# Supplementary material for: Intercomparison of bias correction methods for precipitation of multiple GCMs across six continents
Source: Copernicus journal article supplement (doi:10.5194/gmd-2024-177), 2024-11-14
Supplement: Supplementary file 1 [file gmd-2024-177-supplement.pdf]

Supporting Information for

**Intercomparison of bias correction methods for precipitation of multiple GCMs across six continents**

Young Hoon Song<sup>1</sup>, Eun-Sung Chung<sup>1\*</sup>

<sup>1</sup> Faculty of Civil Engineering, Seoul National University of Science and Technology, 232 Gongneung-ro, Nowon-gu, Seoul 01811, Korea.

**Contents of this file**

Supplementary Figures S1 to S9

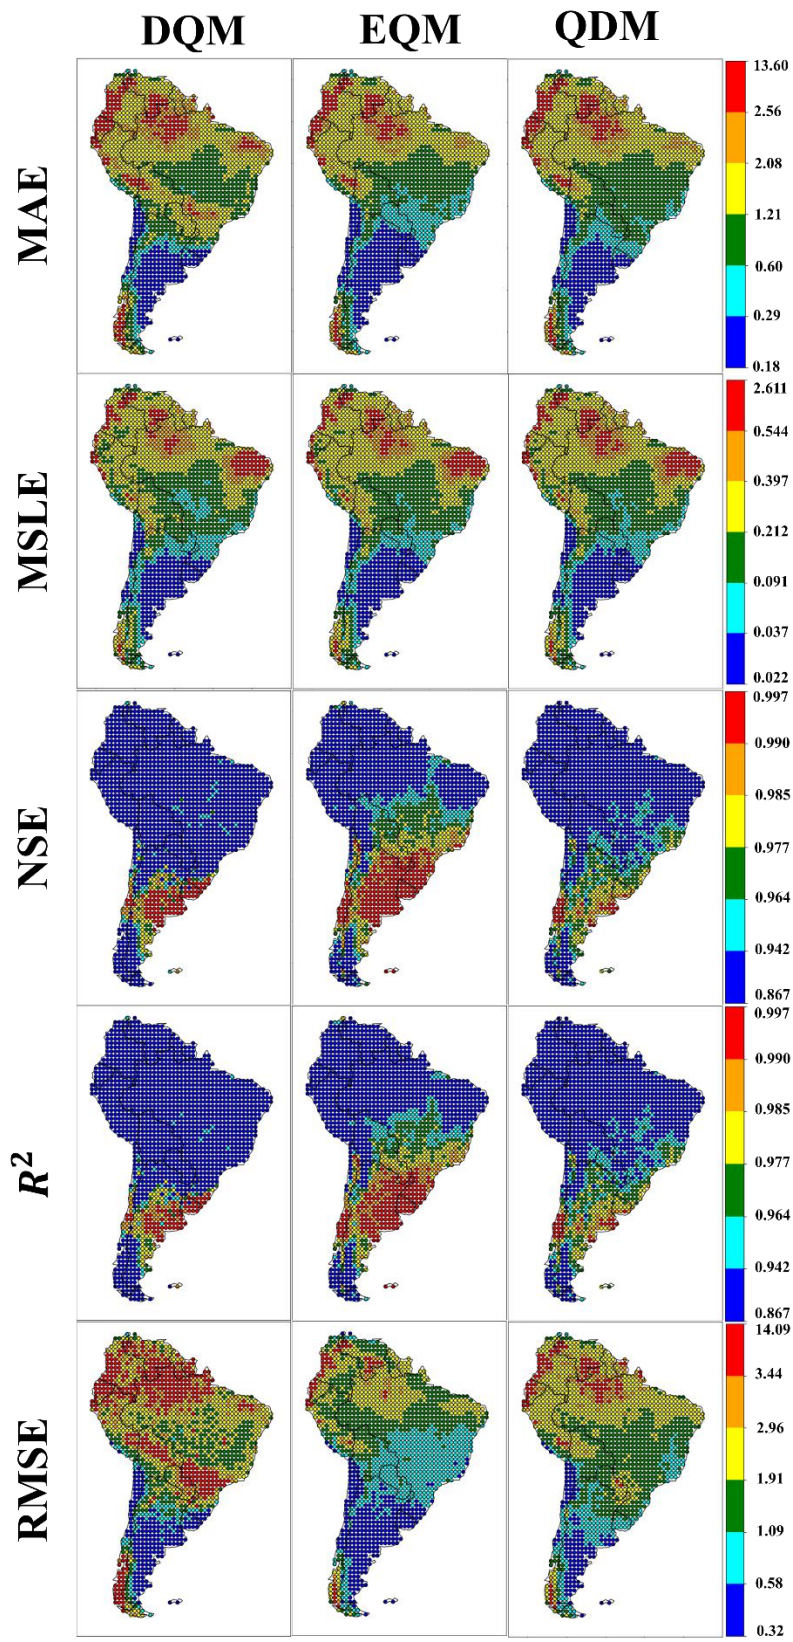

Figure S1. Performance comparison of DQM, EQM, and QDM using evaluation metrics (MAE, MSLE, NSE,  $R^2$ , and RMSE) for daily precipitation in South America

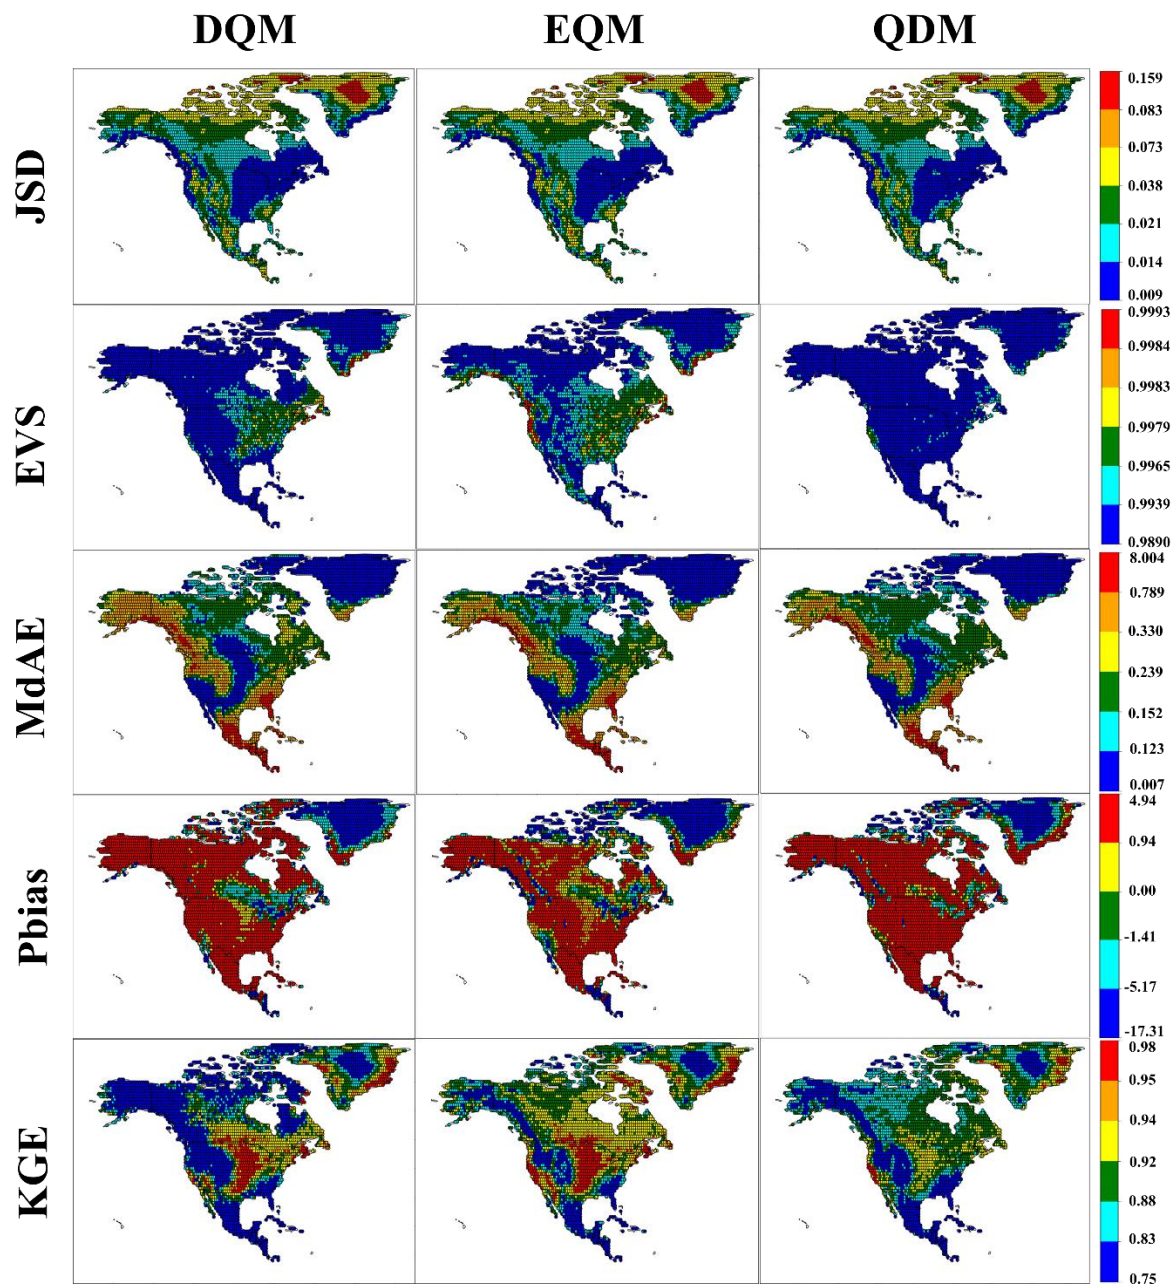

Figure S2. Performance comparison of DQM, EQM, and QDM using evaluation metrics (JSD, EVS, MdAE, Pbias, and KGE) for daily precipitation in North America

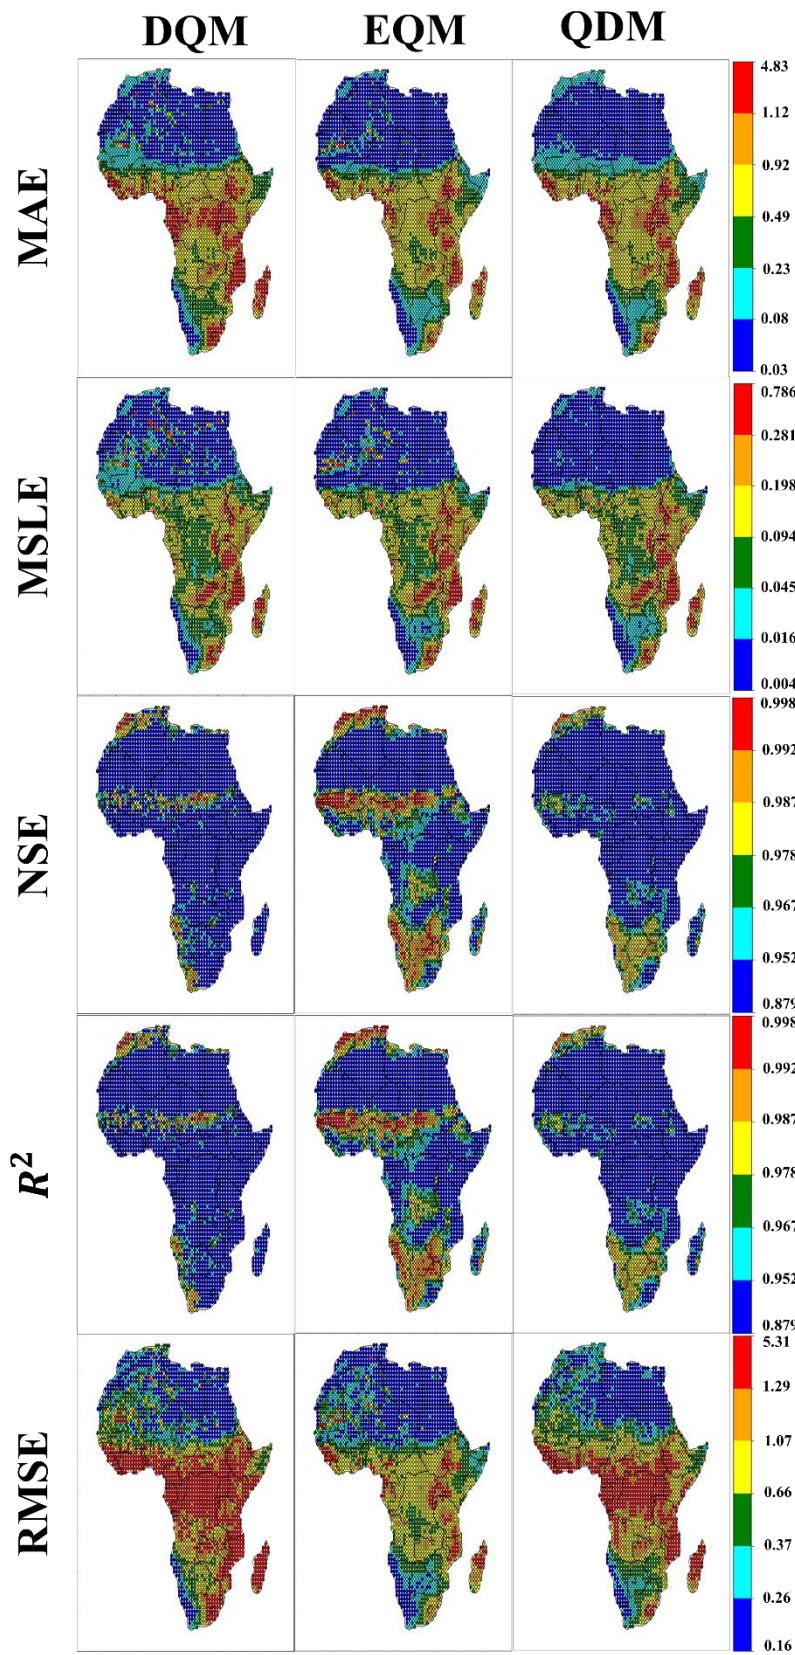

Figure S3. Performance comparison of DQM, EQM, and QDM using evaluation metrics (MAE, MSLE, NSE,  $R^2$ , and RMSE) for daily precipitation in Africa

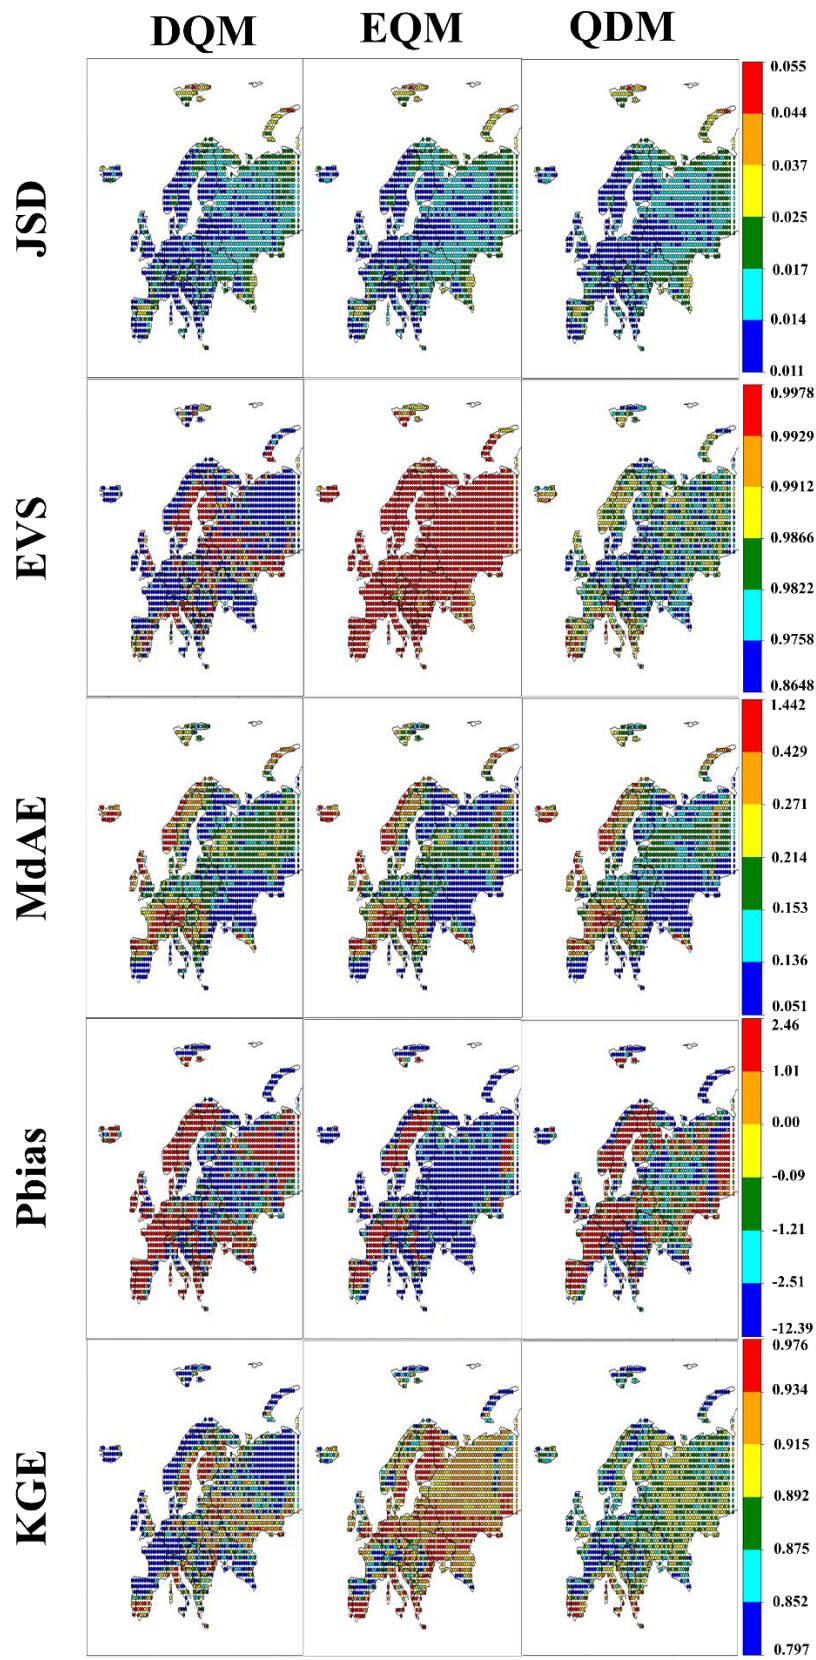

Figure S4. Performance comparison of DQM, EQM, and QDM using evaluation metrics (JSD, EVS, MdAE, Pbias, and KGE) for daily precipitation in Europe

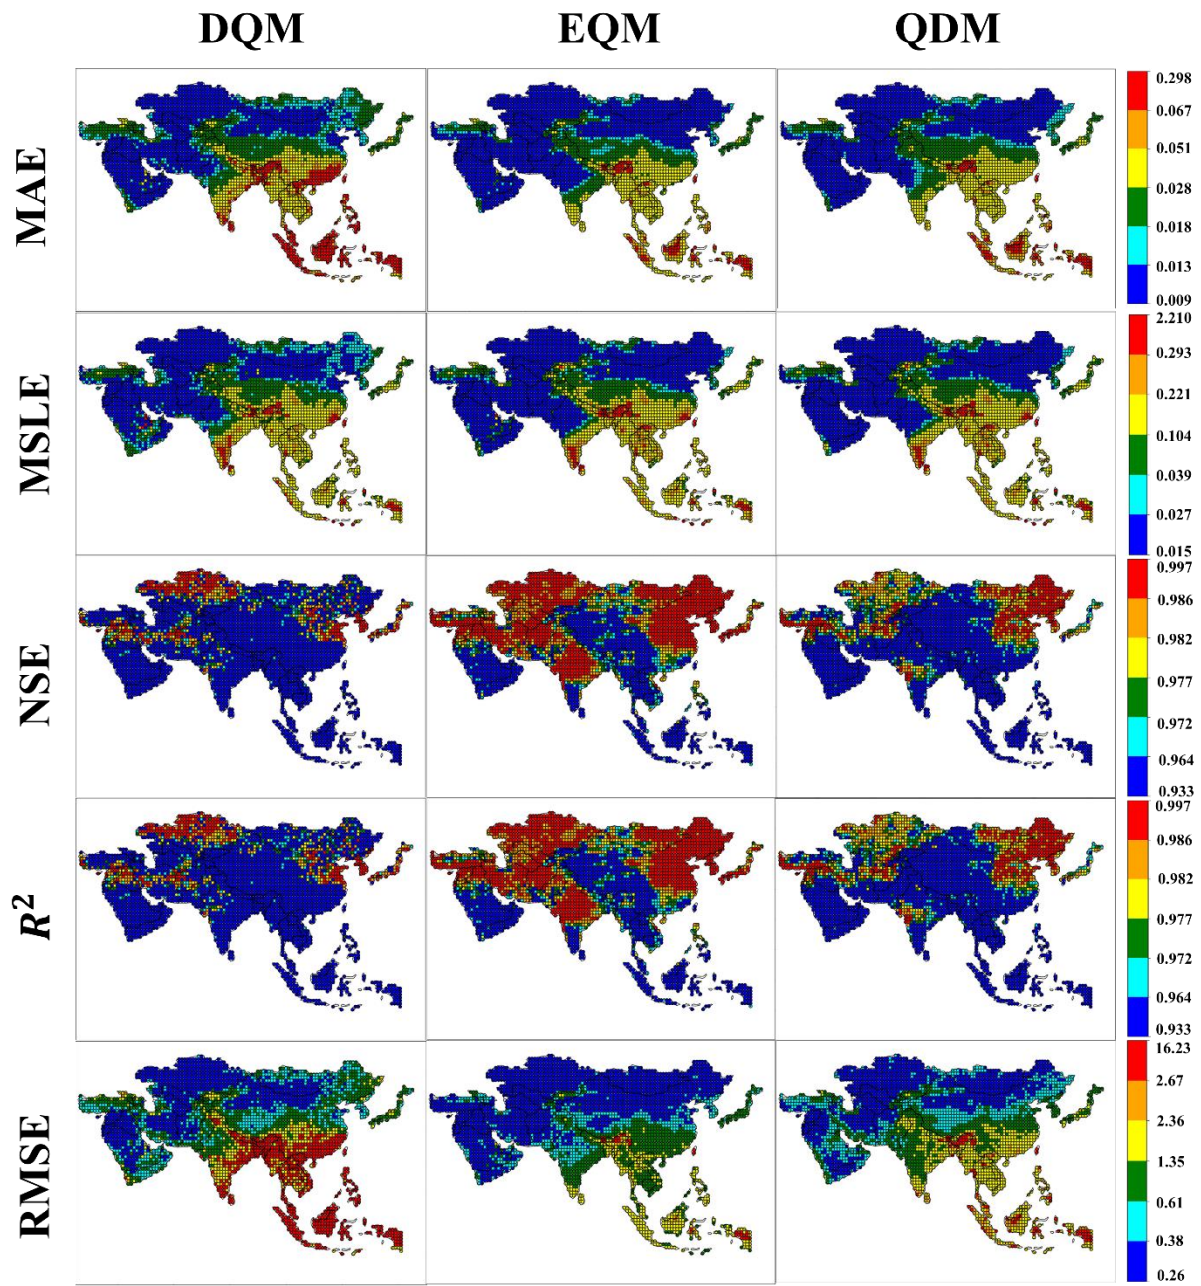

Figure S5. Performance comparison of DQM, EQM, and QDM using evaluation metrics (MAE, MSLE, NSE,  $R^2$ , and RMSE) for daily precipitation in Asia

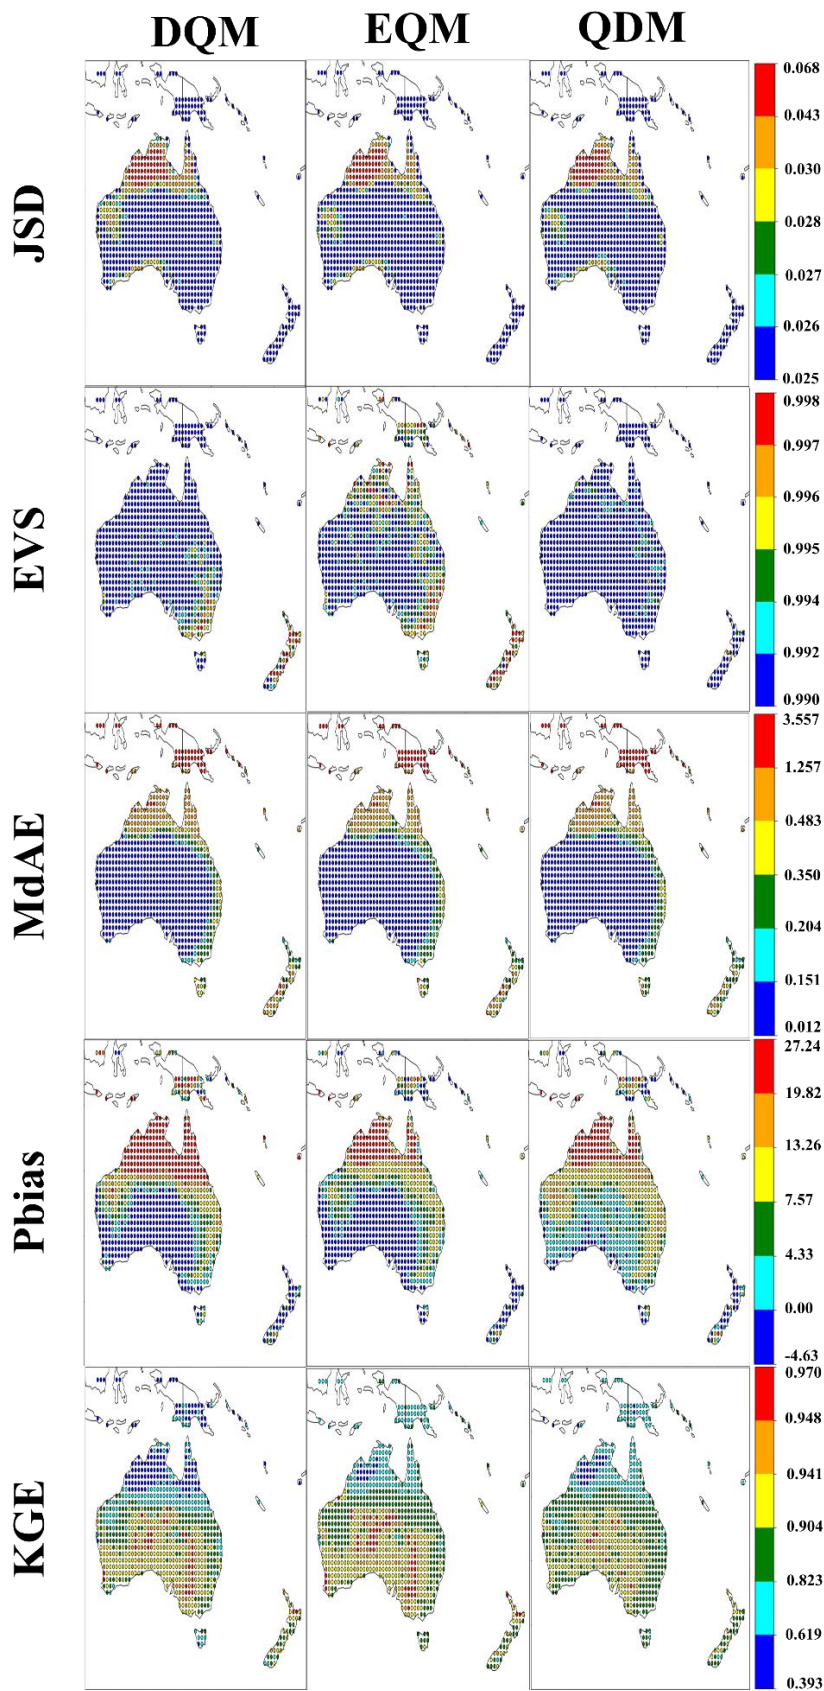

Figure S6. Performance comparison of DQM, EQM, and QDM using evaluation metrics (JSD, EVS, MdAE, Pbias, and KGE) for daily precipitation in Oceania

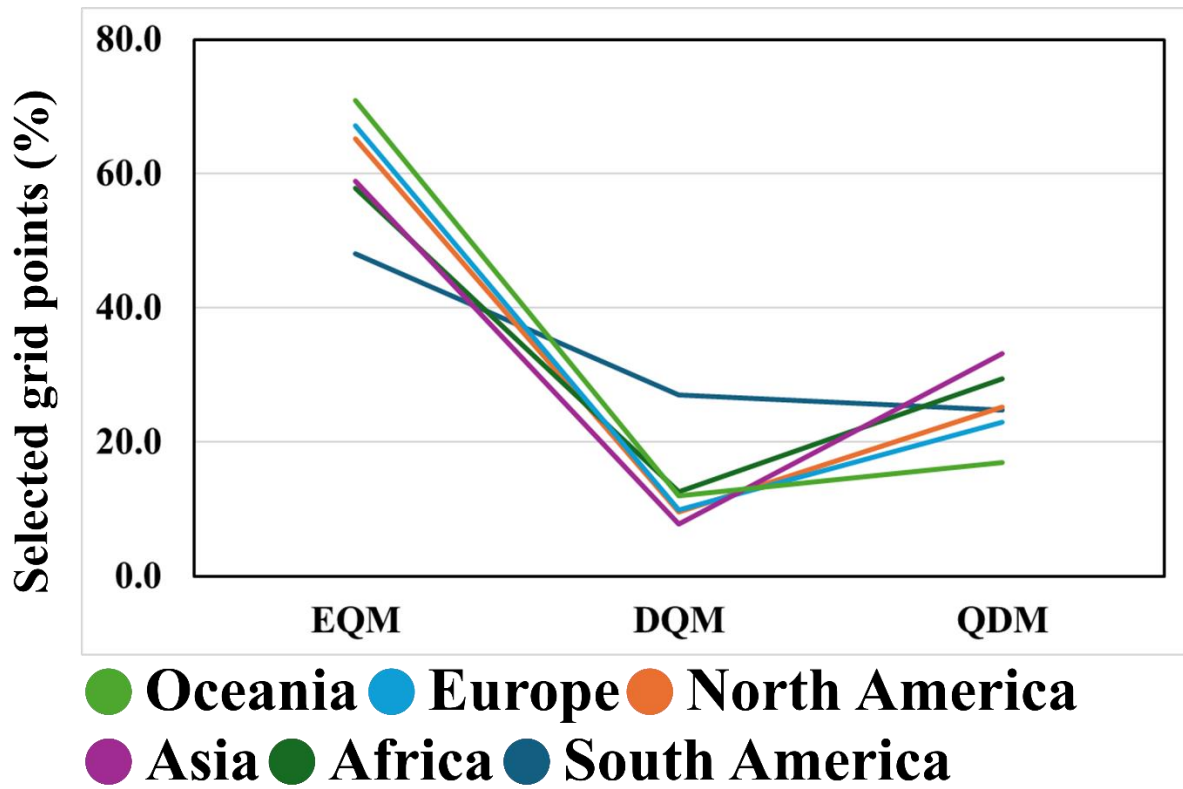

Figure S7. Percentage of selected grid points for best bias correction methods across continents



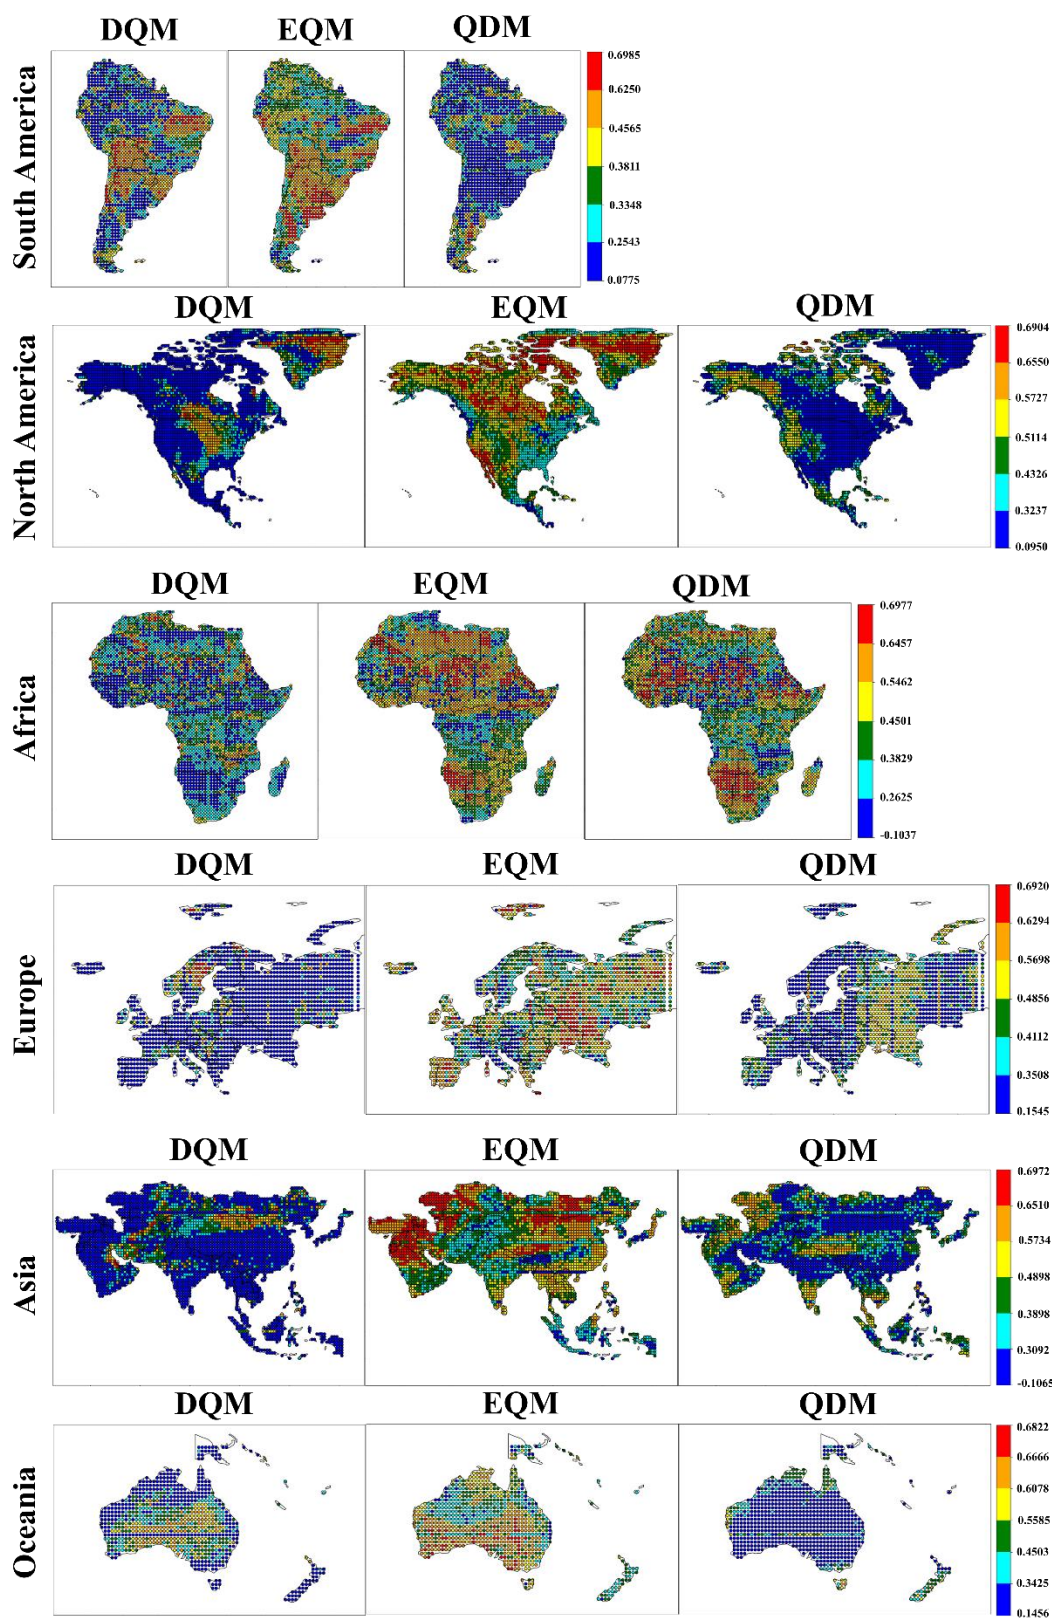

Figure S8 Spatial distribution of comprehensive indices for bias correction methods with the emphasized performance weight ( $\alpha: 0.7$ ,  $\beta: 0.3$ ) across continents

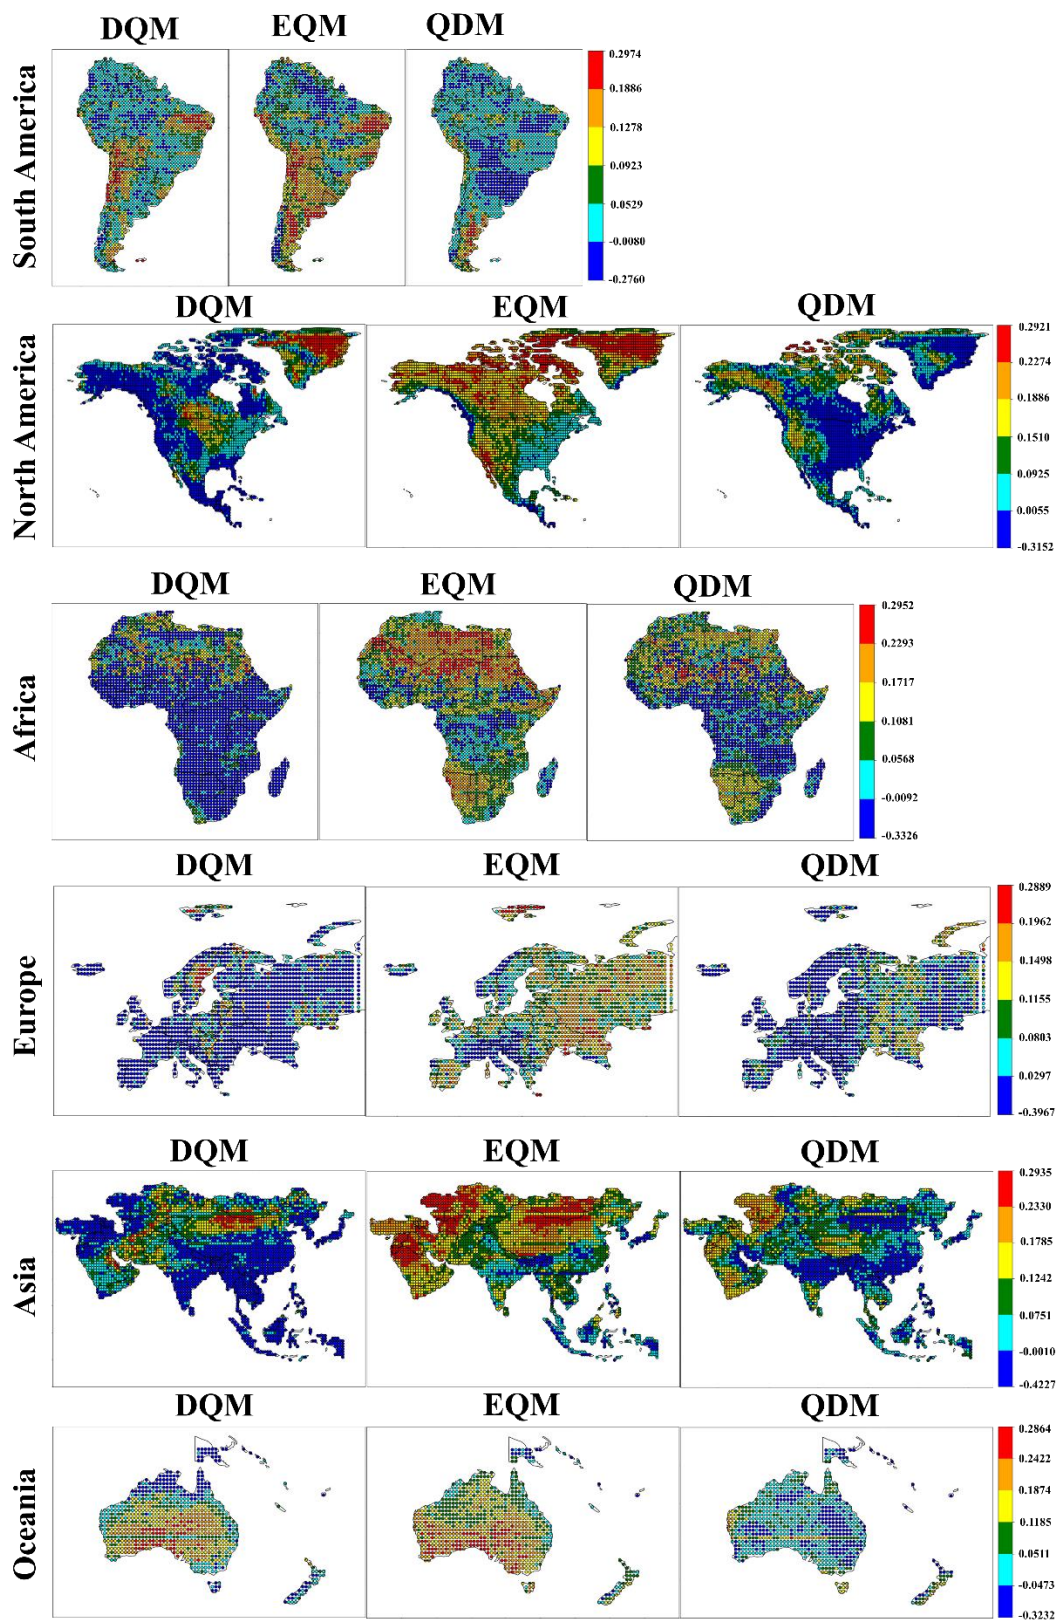

Figure S9 Spatial distribution of comprehensive indices for bias correction methods with emphasized uncertainty weight ( $\alpha: 0.3$ ,  $\beta: 0.7$ ) across continents
