# Supplementary material for: Intercomparison of bias correction methods for precipitation of multiple GCMs across six continents
Source: Copernicus journal article supplement (doi:10.5194/gmd-2024-177), 2024-11-14
Supplement: Supplementary file [file gmd-2024-177-CC11-supplement.pdf]

Thank you very much for your interest in our paper. As you noted, this study aims to make a significant contribution to determining the reliability of GCMs in climate prediction and impact assessment. Previous bias correction studies have primarily focused on selecting the appropriate method based on performance alone; however, this approach has limitations due to the uncertainties arising from various factors. Our research proposes a comprehensive index that integrates uncertainty quantification with performance evaluation when selecting bias correction methods. This approach provides an opportunity to further enhance the reliability of climate models. Specifically, we expect that the results of this study will be effectively used in the process of selecting GCMs and evaluating the various methods applied in the models, ultimately aiding in the choice of the most suitable approach. Once again, we sincerely appreciate your interest and valuable feedback. Now, I would like to address your comments.

### **Comment 1**

L50: What do the authors mean by “which has reduced difference between GCM simulations and observed precipitation? Do the authors mean uncertainty/error in GCMs relative to the observed?”

### **Answer**

We thank the reviewer for raising this important point. In the original sentence, “reduced the difference between GCM simulations and observed precipitation,” we intended to convey that the bias correction methods decrease the systematic errors namely, the bias present in raw GCM outputs when compared to observed (or reference) precipitation data. Raw GCM simulations often exhibit significant discrepancies from observations due to inherent model limitations and incomplete representations of key physical processes. Therefore, many studies apply various bias correction techniques (e.g., quantile mapping methods) to adjust the raw simulations so that they align more closely with observed precipitation, thereby reducing error metrics such as RMSE or MAE. We have clarified this point in the revised manuscript to emphasize that “reduced difference” refers to the decrease in systematic bias/error rather than a reduction in model uncertainty. In addition, we have revised the sentence to clearly express its meaning as follows:

Many studies have developed appropriate bias correction methods based on various theories, which have reduced the difference between raw GCM simulations and observed precipitation (Abdelmoaty and Papalexiou, 2023; Shanmugam et al., 2024; Rahimi et al., 2021).

### **Comment 2**

L57: change “a recent study” to “recent studies” and remove “an”

### **Answer**

Thank you for your comment. We acknowledge that there were some errors in writing the sentence.

Taking your comments into account, we have revised the sentence as follows:

To address these limitations, recent studies proposed an improved QM approach to reflect future non-stationary precipitation across all quantiles of historical precipitation (Rajulapati and Papalexiou, 2023; Cannon et al., 2015; Cannon, 2018; Song et al., 2022b).

### **Comment 3**

L70: There is an abrupt deflection from the bias correction discussion to the MCDA in this paragraph disrupting the flow from the previous paragraph. Authors emphasized the need for selecting appropriate bias correction methods in L67 – 69 and abruptly jumped to GCMs performance evaluation and then again to bias correction. I suggest moving paragraph three to paragraph four and paragraph four to three. Authors should also add a brief importance of TOPSIS to the MCDA method and why it was chosen out of the many other MCDA methods. Nothing about the BMA method was also mentioned in any part of the introduction except at the last paragraph that it was used. While this information is always detailed in the methodology section, briefly introducing while they are used in the introduction section gives comprehensiveness to this section.

### **Answer**

We have carefully considered the reviewer's suggestion regarding the change in paragraph order. However, in paragraph 3 we describe the reasons behind the implementation of existing bias correction methods for GCMs, their limitations, and the various approaches that have been proposed to overcome these shortcomings. In particular, the last sentence emphasizes that the improved QM techniques do not provide uniform results across all grids and points, thereby necessitating a robust evaluation framework for selecting the appropriate QM method. The following paragraph then naturally introduces the MCDA framework. Thus, we believe that the current structure, without any change in paragraph order, already maintains a sufficient logical flow and connectivity.

Nonetheless, to strengthen paragraphs 3 and 4, we have added the following passages regarding TOPSIS and BMA:

Technique for Order Preference by Similarity to Ideal Solution (TOPSIS) is effectively utilized in our study's MCDA framework by integrating multiple evaluation metrics and calculating the distance between each alternative and the ideal solution, thereby enabling clear and intuitive prioritization decisions.

Furthermore, Bayesian Model Averaging (BMA) plays a crucial role in quantifying the predictive uncertainty of multiple climate models and enhancing the reliability of the final predictions, which is why it has been employed as an indispensable tool in our integrated evaluation.

#### **Comment 4**

L79: This line in part shows the justification for this research. I suggest authors put all justification for the study in the second to the last or last paragraph of this section.

#### **Answer**

Thank you for your insightful comment. We have incorporated your suggestions by adding the following sentence to the introduction:

In light of the challenges outlined above, including discrepancies among bias correction methods, regional variability in precipitation distributions, and significant uncertainties in GCM outputs, there is a clear need for an integrated framework that evaluates the performance of various QM methods and quantifies their associated uncertainties.

#### **Comment 5**

L96: change “simulation” to “simulated” or change “simulation precipitation” to “precipitation simulation”

#### **Answer**

Thank you for your comment. We have revised the text as follows:

However, accurately identifying biases in **precipitation simulation** remains challenging due to the lack of comprehensive equations reflecting Earth's physical processes.

#### **Comment 6**

L121: Considering that there are many GCMs, why did the authors consider just 11 in their study?

#### **Answer**

The reason we used only 11 CMIP6 GCMs in this study is that applying QM methods requires extensive computational time. Generating bias-corrected results with three QM methods across 11 CMIP6 GCMs took more than six months. Nonetheless, we determined that using fewer than 10 GCMs would not adequately justify the study, which is why we employed 11 CMIP6 GCMs. We appreciate your understanding on this matter.

#### **Comment 7**

L122: mentioning temperature here is not necessary since the study doesn't consider temperature.

#### **Answer**

Thank you for your comment. We have removed the sentence from the main text in response to your suggestion.

### Comment 8

L129: In table 1. I think the climate variables and the variant label columns are not necessary since only single ones were used. Mentioning it in the text is sufficient. Authors should consider including the full name of the institutions or any other information.

### Answer

Thank you for your comment. In response, we have revised Table 1 and the text as follows:

Table 1. Information of CMIP6 GCMs in this study

| Institution                                                                 | Models           | Resolution                    |
|-----------------------------------------------------------------------------|------------------|-------------------------------|
| Commonwealth scientific and industrial research organization/<br>Australia  | ACCESS-CM2       | $1.2^\circ \times 1.8^\circ$  |
|                                                                             | ACCESS-ESM1-5    | $1.2^\circ \times 1.8^\circ$  |
| Beijing Climate Center/China                                                | BCC-CSM2-MR      | $1.1^\circ \times 1.1^\circ$  |
| Canadian Centre for Climate Modeling and Analysis/ Canada                   | CanESM5          | $2.8^\circ \times 2.8^\circ$  |
| National Center for Atmospheric Research                                    | CESM2-WACCM      | $0.9^\circ \times 1.3^\circ$  |
| Euro-Mediterranean Center on Climate Change coupled<br>climate model/ Italy | CMCC-CM2-SR5     | $\sim 0.9^\circ$              |
|                                                                             | CMCC-ESM2        | $0.9^\circ \times 1.25^\circ$ |
| EC-Earth Climate Model Consortium/ EC-EARTH consortium                      | EC-Earth3-Veg-LR | $1.0^\circ \times 1.0^\circ$  |
| National Oceanic and Atmospheric Administration/ United<br>States           | GFDL-ESM4        | $1.4^\circ \times 1.4^\circ$  |
| Institute for Numerical Mathematics/ Russia                                 | INM-CM4-8        | $\sim 0.9^\circ$              |
| Institute Pierre Simon Laplace/ France                                      | IPSL-CM6A-LR     | $1.1^\circ \times 1.1^\circ$  |

### Comment 9

L136: change “availability” to “purpose”

### Answer

Thank you for your comment. We attempted to locate the term "availability" in L136, but it was not present. Please review it once again.

### Comment 10

L146 – 148: were the historical GCMs corrected before comparison to the observed? If so, why was this done since many studies usually compare the raw GCMs first with the reference before bias correcting and then comparing the bias corrected with the reference. If otherwise, authors should rephrase the sentence.

### Answer

Thank you for your comment. In this study, we compared the raw GCMs and the bias-corrected GCMs with the reference data. In particular, Figure 1 compares the bias-corrected GCMs and raw GCMs using Taylor diagrams.

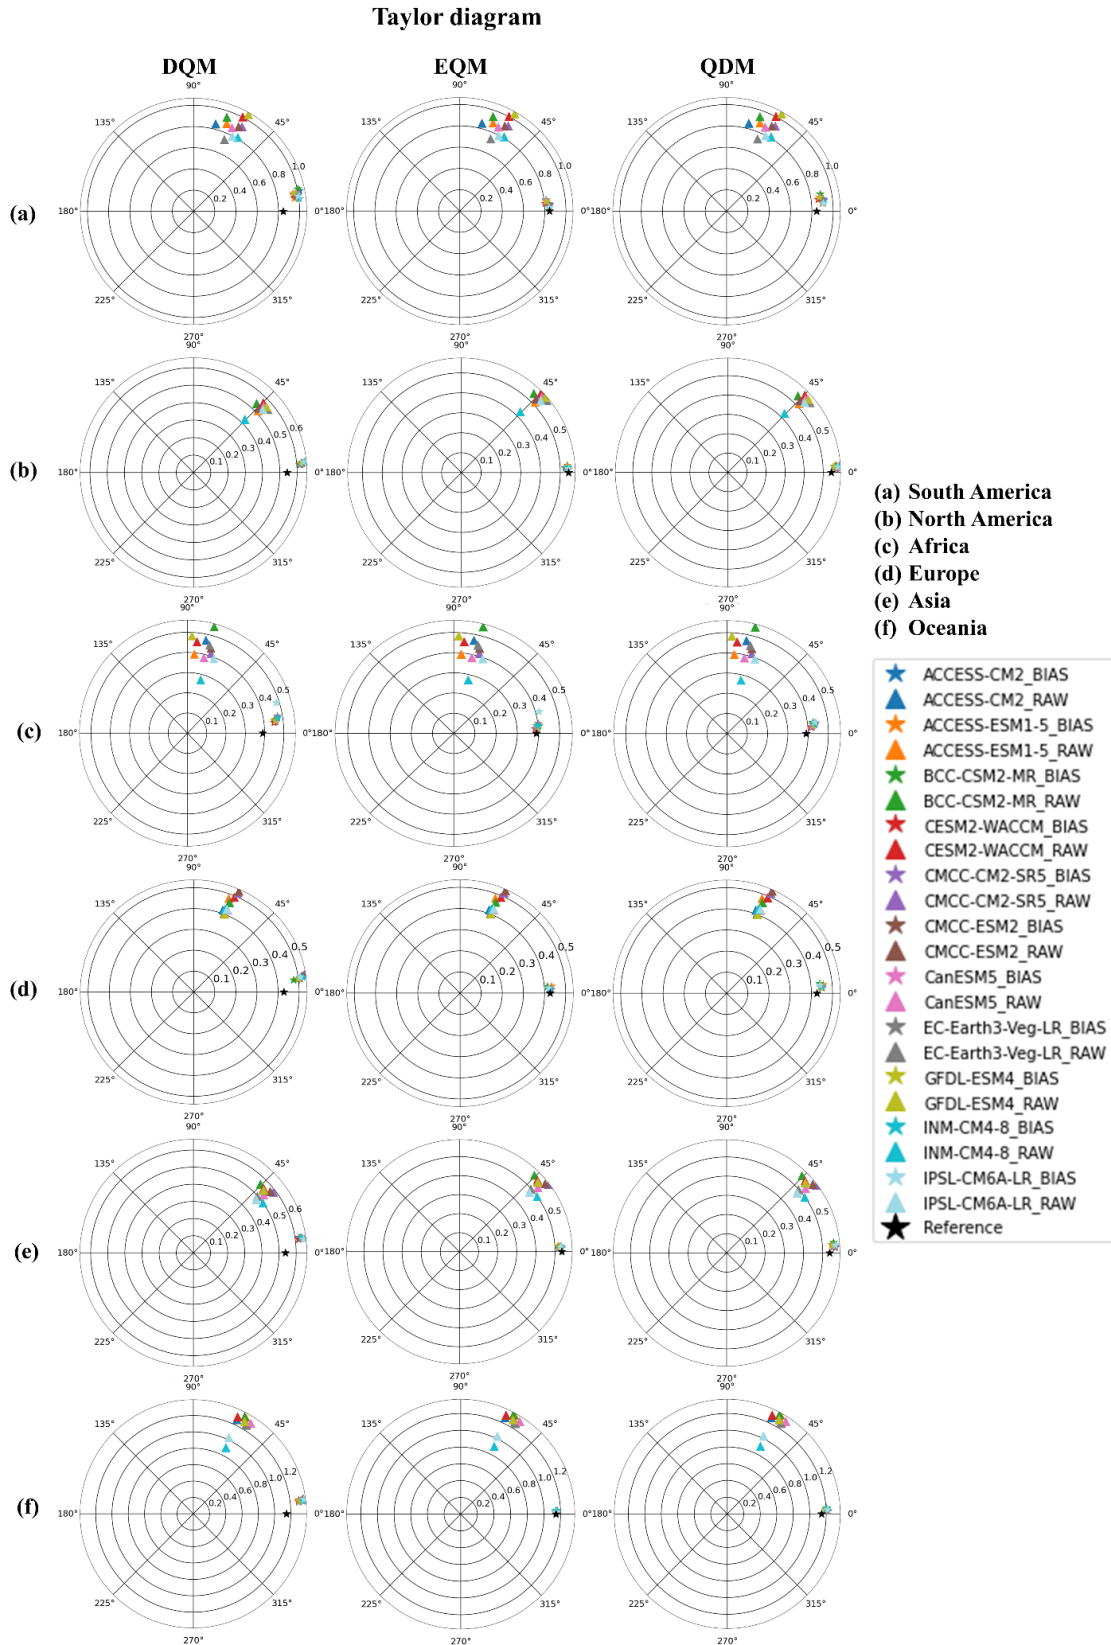

Figure 1. Comparison of raw and corrected daily precipitation on six continents using Taylor diagrams

### **Comment 11**

L148: why was the “frequency-adaptation technique” further needed?.

### **Answer**

Frequency-adaptation is used not only to adjust the magnitude of a climate variable but also the frequency of its events. Climate models, particularly for variables such as precipitation, often exhibit biases in both the intensity of precipitation and the number of precipitation days (i.e., the frequency) compared to observations. This technique adjusts the frequency of precipitation in the model output so that it more closely matches the observational data, thereby enhancing the realism of the overall distribution and the representation of extreme events. In addition, frequency adaptation is employed to address the issue that regional climate models often simulate a lower frequency of dry days than observed, which, if left uncorrected, would lead to a systematic wet bias in the bias-corrected precipitation. This technique randomly interpolates a portion of the excess dry-day cases to preserve the observed distribution of dry days and improve the overall accuracy of Quantile Mapping. The effectiveness of this approach has been demonstrated in Themeßl et al. (2011). For example, when correcting precipitation, if a model predicts too many light rain events or too few heavy rain events compared to reality, the frequency-adaptation technique adjusts these frequency differences. As a result, both the magnitude and the frequency of precipitation events are accurately represented, leading to more reliable climate predictions.

### **Comment 12**

L187: The authors mentioned 10 metrics and again later mentioned 7 metrics. Table show 10 were used. Authors should correct this in text.

### **Answer**

Thank you for your comment. In response to your suggestion, we have revised the sentence as follows:

Ten evaluation metrics used in this study are as follows: Root Mean Square Error (RMSE), Mean Absolute Error (MAE), Coefficient of Determination ( $R^2$ ), Percent bias (Pbias), Nash-Sutcliffe Efficiency (NSE), Kling-Gupta Efficiency (KGE), Median Absolute Error (MdAE), Mean Squared Logarithmic Error (MSLE), Explained Variance Score (EVS), and Jensen-Shannon divergence (JS-D).

### **Comment 13**

L187: The authors mentioned 10 metrics and again later mentioned 7 metrics. Table show 10 were used.

Authors should correct this in text.

**Answer**

Thank you for your comment. In response to your suggestion, we have revised the sentence as follows:

Ten evaluation metrics used in this study are as follows: Root Mean Square Error (RMSE), Mean Absolute Error (MAE), Coefficient of Determination ( $R^2$ ), Percent bias (Pbias), Nash-Sutcliffe Efficiency (NSE), Kling-Gupta efficiency (KGE), Median Absolute Error (MdAE), Mean Squared Logarithmic Error (MSLE), Explained Variance Score (EVS), and Jensen-Shannon divergence (JS-D).

**Comment 14**

L206: GEV was not mentioned at all in the introduction section. A brief introduction about it and its usage should be introduced in the introduction section.

**Answer**

Thank you for your comment. In response, we have added the following sentence:

Furthermore, they compared the extreme precipitation of GCMs using the GEV distribution, which allows for more effective estimation of extreme precipitation, and demonstrated that the performance in estimating extreme precipitation varies according to different bias correction methods.

**Comment 15**

L291: The first sentence: “This study applied.....” is a repetition. It should be removed..

**Answer**

Thank you for your comment. In response to your suggestion, we have revised the sentence as follows:

A Taylor diagram was used to compare the bias-corrected and raw GCM precipitation with the observed data, and Figure 1 presents the results of applying the three QM methods to 11 CMIP6 GCMs.

**Comment 16**

L292: Authors mentioned that figure 1 show the before and after bias correction of the precipitation. There is no indication of the before and after correction in the figure. The figure seems to be showing either of them. Authors should clarify. Figure also shows there seems to be no any changes in the performances of some models based on the three BC methods in some regions. For example, in South America where there are no changes based on the BC methods for models between 45 - 90 o . What could be the reason for these?

**Answer**

Thank you for your comment. In Figure 1, the triangles represent the raw GCM precipitation, while the star symbols represent the bias-corrected GCM precipitation. Furthermore, the black star in Figure 1 denotes the reference data, and most of the bias-corrected GCM precipitation values closely match the reference data across all continents. The models located between 45° and 90° in South America, as you mentioned, represent the raw GCM precipitation. Therefore, all the Taylor diagrams in Figure 1 include both raw and bias-corrected GCM precipitation.

#### **Comment 17**

L320: This study.....This is not necessary. It can be removed.

#### **Answer**

Thank you for your comment. In response to your suggestion, we have revised the sentence as follows:

The spatial patterns of the evaluation metrics computed from the bias-corrected daily precipitation data of GCMs in South America are presented as shown in Figures 2 and S1.

#### **Comment 18**

L339: did authors meant North America here?

#### **Answer**

Thank you for your comment. We made some errors while drafting the text, and in response to your suggestion, we have revised the sentence as follows:

Figures 3 and S2 present the spatial patterns of these evaluation metrics, calculated for daily precipitation from the bias-corrected GCMs in North America.

We utilized supplementary materials to present the results of all evaluation metrics for each continent. Accordingly, the main text explains the outcomes for all 10 evaluation metrics. To further demonstrate that the diversity and computations described in the main text were indeed carried out, we provided various indices. Moreover, the influence of factors such as geographic features (e.g., deserts) on the performance of bias correction methods across regions was primarily discussed in the discussion section with respect to the observations.

#### **Comment 19**

L339: did authors meant North America here?

#### **Answer**

Thank you for your comment. In response to your suggestion, we have revised the caption for Figure 7 as follows:



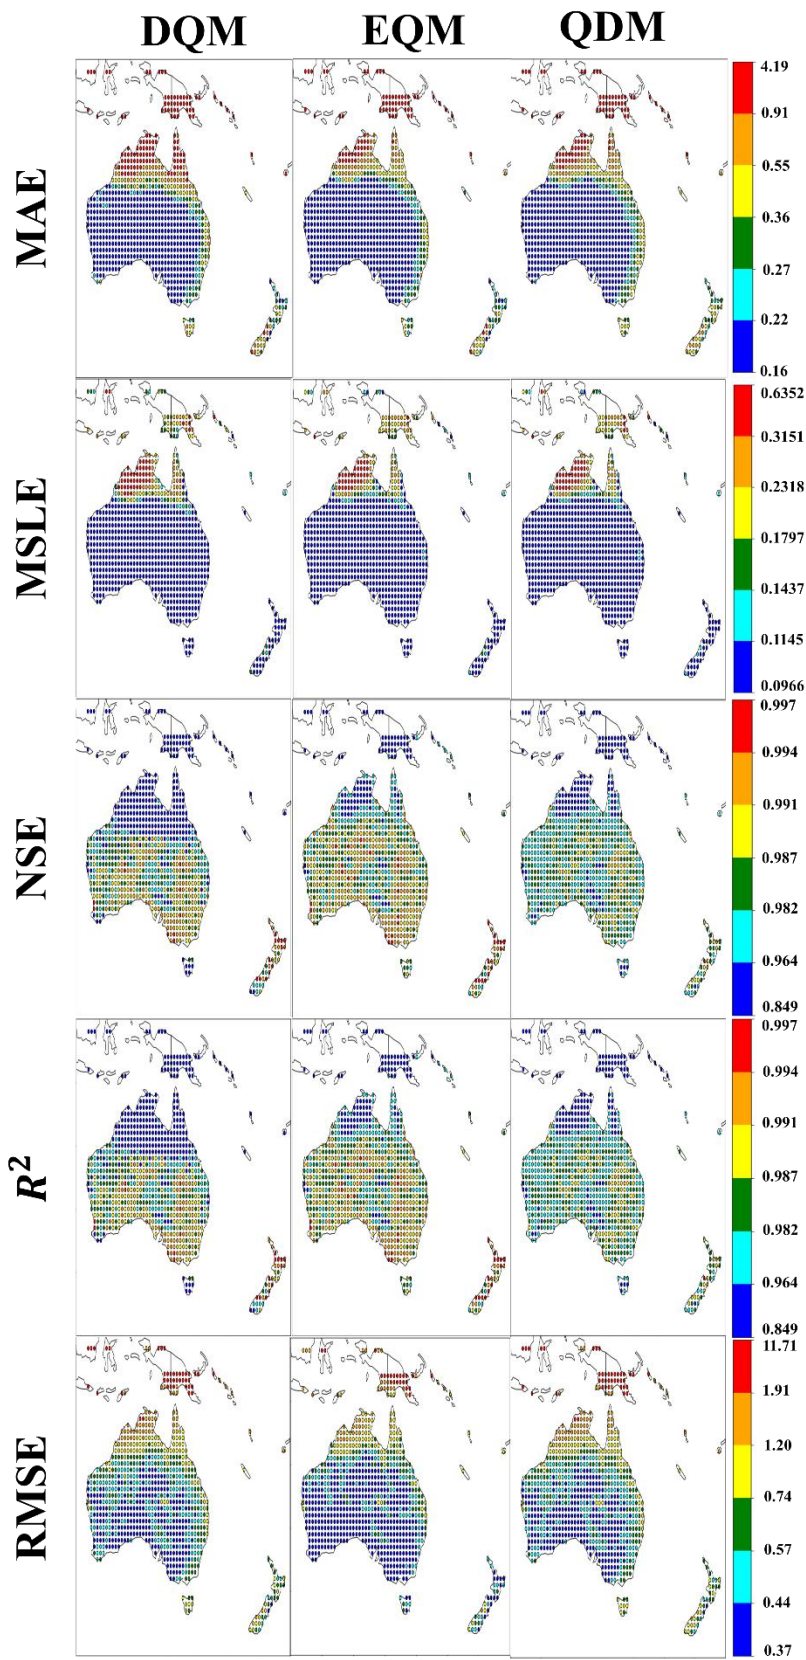

Figure 7. Performances of DQM, EQM, and QDM using evaluation metrics (MAE, MSLE, NSE,  $R^2$ , and RMSE) for daily precipitation in Oceania.

**Comment 20**

L439: removed “biased”

**Answer**

Thank you for your comment. We have revised the sentence as follows:

Figure 9 compares the distribution differences of the daily precipitation adjusted by the bias correction methods based on the GEV distribution using the JSD.

**Comment 21**

L441 – 443: how does this little difference observed for the GEV method compare to the other method in terms of the differences? How does the differences observed in the other methods applied compare to the GEV method?

**Answer**

Thank you for your comment. Figure 9 displays the GEV distributions of the overall precipitation, with distribution differences compared to observed values using the JSD. Subsequently, Figure 10 compares the extreme precipitation values those above the 95th percentile obtained from the three QM methods.

**Comment 22**

L441 – 443: how does this little difference observed for the GEV method compare to the other method in terms of the differences? How does the differences observed in the other methods applied compare to the GEV method?

**Answer**

Thank you for your comment. We have revised the sentence as follows:

In Oceania, high weights were assigned to JSD, KGE, RMSE, and MAE, suggesting that these metrics are critical for evaluating model performance.

**Comment 23**

L42 – 43: This study developed.....There is no need for this sentence.

**Answer**

Thank you for your comment. In response, we have revised the sentence as follows:

A daily precipitation ensemble for the historical period was generated using BMA on 11 CMIP6 GCMs, and the standard deviation of daily precipitation by continent is presented as shown in Figure 14.

**Comment 24**

L575: What factors could contribute to the lower index observed in these regions?

**Answer**

These results quantify the uncertainty arising from predicting precipitation in an ensemble form using BMA on GCMs. This uncertainty is primarily attributed to differences in model structure and physical processes, model weight variance, and uncertainties in the input data. Additionally, variations in the spatial and temporal resolutions of the models and the handling of extreme events can further contribute to the overall uncertainty.

**Comment 25**

L615: I think “best” rather than “proper” is more suitable in this context.

**Answer**

Thank you for your comment. In response, we revised the sentence as follows:

QDM was selected as the best bias correction method in western North America, southern and eastern Africa, and northern Europe.

**Comment 26**

L653: All three methods showed strong overall performance.....This statement seems contradictory of the finding of the better performance of the EQM than the QDM and the QDM than the DQM. Authors should clarify what is meant here.

**Answer**

Thank you for your comment. In order to avoid confusion among readers, we revised the sentence as follows:

All three methods, as evidenced by the Taylor diagram, demonstrated overall stronger performance than the raw GCM and consistently produced good results across various regions. Nonetheless, the performance of the bias-corrected GCMs clearly differs. This highlights the need to use multiple performance metrics to fully understand the strengths and weaknesses of the three QM methods, as relying on a single analysis or macroscopic perspective can overlook important details.

**Comment 27**

L766: In conclusion.....I suggest authors merge this part with the conclusion section since these are some of the conclusions from the study.

**Answer**

Thank you for your comment. In response, we have moved the paragraph to Section 5 (Conclusion) and revised it as follows:

Generally, EQM has emerged as the preferred method due to its balanced performance, but this study emphasizes the importance of regional assessment and careful consideration of uncertainty when selecting a QM method. Furthermore, EQM is the most balanced method regarding performance and uncertainty and will likely be preferred in future climate modeling studies. However, there may be more suitable QM methods depending on the region, and a comprehensive evaluation with various weights is needed. Therefore, when establishing climate change response strategies or policy decisions, it is essential to take a multifaceted approach that considers uncertainty together rather than relying on a single indicator or performance alone. It will enable more reliable predictions and better decision-making. Future research should integrate greenhouse gas scenarios to improve the accuracy of climate predictions and provide a more comprehensive understanding of future climate risks.

**Comment 28**

Were there any limitations of this study. This should be discussed in a paragraph in this section as it can help guide other researchers interested in similar work in the future.

**Answer**

Thank you for your comment. This study has acknowledged its limitations as follows:

Future research should integrate greenhouse gas scenarios to improve the accuracy of climate predictions and provide a more comprehensive understanding of future climate risks.

**Comment 29**

L794: The previous bullets already talked about the conclusions. Authors can remove “In conclusion” from this line or replace it with “generally”

**Answer**

Thank you for your comment. In response to your comment, we have revised the paragraph as follows:

Generally, EQM has emerged as the preferred method due to its balanced performance, but this study emphasizes the importance of regional assessment and careful consideration of uncertainty when selecting a QM method. Furthermore, EQM is the most balanced method regarding performance and uncertainty and will likely be preferred in future climate modeling studies. However, there may be more suitable QM methods depending on the region, and a comprehensive evaluation with various weights is needed. Therefore, when establishing climate change response strategies or policy decisions, it is

essential to take a multifaceted approach that considers uncertainty together rather than relying on a single indicator or performance alone. It will enable more reliable predictions and better decision-making. Future research should integrate greenhouse gas scenarios to improve the accuracy of climate predictions and provide a more comprehensive understanding of future climate risks.

# 1 Intercomparison of bias correction methods for precipitation of 2 multiple GCMs across six continents

3 Young Hoon Song<sup>1</sup>, Eun-Sung Chung<sup>1\*</sup>

4 <sup>1</sup> Faculty of Civil Engineering, Seoul National University of Science and Technology, 232 G  
5 ongneung-ro, Nowon-gu, Seoul 01811, Korea

6  
7 \* Correspondence to: Eun-Sung Chung [eschung@seoultech.ac.kr](mailto:eschung@seoultech.ac.kr)

## 8 9 **Abstract**

10 This study, conducted across six continents, evaluated and compared the effectiveness of three  
11 Quantile Mapping (QM) methods: Quantile Delta Mapping (QDM), Empirical Quantile  
12 Mapping (EQM), and Detrended Quantile Mapping (DQM) for correcting daily precipitation  
13 data from 11 CMIP6 General Circulation Models (GCMs). The performance of corrected  
14 precipitation data was evaluated using ten evaluation metrics, and the Technique for Order of  
15 Preference by Similarity to Ideal Solution (TOPSIS) was applied to calculate performance-  
16 based priorities. Bayesian Model Averaging (BMA) was used to quantify model-specific and  
17 ensemble prediction uncertainties. Subsequently, this study developed a comprehensive index  
18 by aggregating the performance scores from TOPSIS with the uncertainty metrics from BMA.  
19 **According to the results, EQM exhibited the best performance on most metrics across all**  
20 **continents, with values of 0.3 (RMSE), 0.18 (MAE), 0.98 (R square), 0.87 (KGE), 0.93 (NSE),**  
21 **and 0.99 (EVS), while effectively managing uncertainty with a variance of 0.0027. QDM**  
22 **outperformed the other methods in specific regions and achieved the lowest model uncertainty**  
23 **in South America at 0.0025. Furthermore, when greater weight was given to uncertainty, QDM**  
24 **was selected more frequently than DQM by approximately 5% or more.** It suggests that daily  
25 precipitation corrected by QDM is more stable than DQM. On the other hand, DQM effectively  
26 reproduces dry climate but shows the highest uncertainty in certain regions, suggesting  
27 potential limitations in capturing long-term climate trends. This study emphasizes that both  
28 performance and uncertainty should be considered when choosing a bias correction method to  
29 increase the reliability of climate predictions.

31 **Keywords**

32 CMIP6 GCM, Bias correction, Uncertainty, TOPSIS, Comprehensive index

33

## 34 1. Introduction

35 The Coupled Model Intercomparison Project (CMIP) General Circulation Models  
36 (GCMs) have provided critical scientific evidence to explore climate change (IPCC, 2021;  
37 IPCC, 2022). Nevertheless, GCMs exhibit significant biases compared to observational data  
38 for reasons such as incomplete model parameterization and inadequate understanding of key  
39 physical processes (Evin et al., 2024; Zhang et al., 2024; Nair et al., 2023). These deficiencies  
40 with GCM have introduced various uncertainties in climate projections, making ensuring  
41 sufficient reliability in climate change impact assessments difficult. In this context, many  
42 studies have proposed various bias correction methods to reduce the discrepancies between  
43 observational data and GCM simulations, thereby providing more stable results than raw GCM-  
44 based assessments (Cannon et al., 2015; Themeßl et al., 2012; Piani et al., 2010). Despite these  
45 advancements, the suggested bias correction methods differ in their physical approaches,  
46 resulting in discrepancies in the climate variables adjusted for historical periods. Furthermore,  
47 the distribution of precipitation across continents and specific locations causes variations in the  
48 correction outcomes depending on the method used, which makes it challenging to reflect  
49 extreme climate events in future projections and adds another layer of confusion to climate  
50 change research (Song et al., 2022b; Maraëun, 2013; Ehret et al., 2012; Enayati et al., 2021).  
51 Thus, exploring multiple aspects to make reasonable selections when applying bias correction  
52 methods specific to each continent and region is necessary.

53 Many studies have developed appropriate bias correction methods based on various  
54 theories, which have reduced the difference between raw GCM simulations and observed  
55 precipitation (Abdelmoaty and Papalexiou, 2023; Shanmugam et al., 2024; Rahimi et al., 2021).  
56 The Quantile Mapping (QM) series has been widely adopted among bias correction methods  
57 due to its conceptual simplicity, ease of application, and adaptability to various methodologies.  
58 However, although standard QM methods have high performance in correcting stationary  
59 precipitation, they are less efficient in non-stationary data, such as extreme precipitation events  
60 (Song et al., 2022b). To address these limitations, recent studies proposed an improved QM  
61 approach to reflect future non-stationary precipitation across all quantiles of historical  
62 precipitation (Rajulapati and Papalexiou, 2023; Cannon et al., 2015; Cannon, 2018; Song et al.,  
63 2022b). In recent years, climate studies using GCMs have adopted several improved QM  
64 methods that offer higher performance than previous methods to correct historical precipitation  
65 and project it accurately into the future. For example, Song et al. (2022b) performed bias



66 correction on daily historical precipitation over South Korea using distribution transformation  
67 methods they developed and found that the best QM method varied depending on the station.  
68 Additionally, previous studies have reported that QM performance varied by grid and station  
69 (Ishizaki et al., 2022; Chua et al., 2022). **Furthermore, they compared the extreme precipitation  
70 of GCMs using the GEV distribution, which allows for more effective estimation of extreme  
71 precipitation, and demonstrated that the performance in estimating extreme precipitation varies  
72 according to different bias correction methods.** From this perspective, these improved QMs  
73 may only guarantee uniform results across some grids and regions. Therefore, to analyze  
74 positive changes in future climate impact assessments, selecting appropriate bias correction  
75 methods based on a robust framework is essential.

76 Multi-criteria decision analysis (MCDA) is efficient for prioritization because it can  
77 aggregate diverse information from various alternatives. MCDA has been extensively used  
78 across different fields to select suitable alternatives, with numerous studies confirming its  
79 stability in priority selection (Chae et al., 2022; Chung and Kim, 2014; Song et al., 2024a).  
80 Moreover, MCDA has been employed in future climate change studies to provide reasonable  
81 solutions to emerging problems, including the selection of bias correction methods for specific  
82 regions and countries (Homsy et al., 2019; Saranya and Vinish, 2021). **Technique for Order  
83 Preference by Similarity to Ideal Solution (TOPSIS) is effectively utilized in our study's  
84 MCDA framework by integrating multiple evaluation metrics and calculating the distance  
85 between each alternative and the ideal solution, thereby enabling clear and intuitive  
86 prioritization decisions.** However, MCDA's effectiveness is sensitive to the source and quality  
87 of alternatives, making accurate ranking challenging when information is lacking or overly  
88 focused on specific criteria (Song and Chung, 2016). Small-scale regional and observation-  
89 based studies have conducted GCM performance evaluations, but global and continental-scale  
90 evaluations are rare due to the substantial time and cost required.

91 GCM simulation includes uncertainties from various sources, such as model structure,  
92 initial condition, boundary condition, and parameters (Pathak et al., 2023; Cox and Stephenson,  
93 2007; Yip et al., 2011; Woldemeskel et al., 2014). The selection of bias correction methods  
94 contributes significantly to uncertainty in climate change research using GCMs. Jobst et al.  
95 (2018) argued that GHG emission scenarios, bias correction methods, and GCMs are primary  
96 sources of uncertainty in climate change assessments across various fields. The extensive  
97 uncertainties in GCMs complicate the efficient establishment of adaptation and mitigation

98 policies. This issue has increased awareness of the uncertainties inherent in historical  
99 simulations. Consequently, many studies have focused on estimating uncertainties using  
100 diverse methods to quantify these uncertainties (Giorgi and Mearns, 2002; Song et al., 2022a;  
101 Song et al., 2023). Although it is impossible to drastically reduce the uncertainty of GCM  
102 outputs due to the unpredictable nature of climate phenomena, uncertainties in GCM  
103 simulations can be reduced using ensemble principles, such as multi-model ensemble  
104 development using a rational approach (Song et al., 2024). **However, accurately identifying  
105 biases in precipitation simulation remains challenging due to the lack of comprehensive  
106 equations reflecting Earth's physical processes.** In this context, climate change studies have  
107 aimed to quantify the uncertainty of historical climate variables in GCMs, offering insights into  
108 the variability of GCM simulations (Pathak et al., 2023). Bias-corrected precipitation of GCMs  
109 using QM has shown high performance in the historical period, which is expected to result in  
110 better future predictions. However, the physical concepts of various QMs may lead to more  
111 significant uncertainty in the future (Lafferty et al., 2023). Therefore, efforts should be made  
112 to consider and reduce uncertainty in the GCM selection process. It will ensure the reliability  
113 of predictions by selecting an appropriate bias-correcting method. **Furthermore, Bayesian  
114 Model Averaging (BMA) plays a crucial role in quantifying the predictive uncertainty of  
115 multiple climate models and enhancing the reliability of the final predictions, which is why it  
116 has been employed as an indispensable tool in our integrated evaluation.**

117 **In light of the challenges outlined above, including discrepancies among bias  
118 correction methods, regional variability in precipitation distributions, and significant  
119 uncertainties in GCM outputs, there is a clear need for an integrated framework that evaluates  
120 the performance of various QM methods and quantifies their associated uncertainties.** This  
121 study aims to compare the performance of three bias correction methods using daily historical  
122 precipitation data (1980-2014) from CMIP6 GCMs across six continents (South America: SA;  
123 North America: NA; Africa: AF; Europe: EU; Asia: AS; and Oceania: OA). Ten evaluation  
124 metrics were used to assess the performance of daily precipitation corrected by the three QM  
125 methods for each continent. Subsequently, the Technique for Order of Preference by Similarity  
126 to Ideal Solution (TOPSIS) of MCDA was applied to select an appropriate bias correction  
127 method for each continent. Additionally, the uncertainty in daily precipitation for historical  
128 periods was quantified using BMA. By integrating performance scores from TOPSIS and  
129 uncertainty metrics from BMA, this study developed a Comprehensive Index (CI), which was

130 then used to select the best bias correction method for each continent. This comprehensive  
 131 approach ensures a balanced consideration of both performance and uncertainty, enhancing  
 132 understanding of the bias correction process based on the distribution of daily precipitation  
 133 across continents.

134

## 135 **2. Datasets and methods**

### 136 **2.1 General Circulation Model**

137 This study used 11 CMIP6 GCM to perform bias correction for daily precipitation in the  
 138 historical period. The variant label for the GCMs used in this study was r1i1p1f1. Table 1  
 139 presents basic information, including model names, resolution. The model resolution of 11  
 140 CMIP6 GCMs was equally re-gridded to  $1^\circ \times 1^\circ$  using linear interpolation. Furthermore, this  
 141 study's ensemble member of CMIP6 GCMs was the first member of realizations (r1).

142

143 **Table 1. Information of CMIP6 GCMs in this study**

| <b>Institution</b>                                                       | <b>Models</b>    | <b>Resolution</b>             |
|--------------------------------------------------------------------------|------------------|-------------------------------|
| Commonwealth scientific and industrial research organization/ Australia  | ACCESS-CM2       | $1.2^\circ \times 1.8^\circ$  |
|                                                                          | ACCESS-ESM1-5    | $1.2^\circ \times 1.8^\circ$  |
| Beijing Climate Center/China                                             | BCC-CSM2-MR      | $1.1^\circ \times 1.1^\circ$  |
| Canadian Centre for Climate Modeling and Analysis/ Canada                | CanESM5          | $2.8^\circ \times 2.8^\circ$  |
| National Center for Atmospheric Research                                 | CESM2-WACCM      | $0.9^\circ \times 1.3^\circ$  |
| Euro-Mediterranean Center on Climate Change coupled climate model/ Italy | CMCC-CM2-SR5     | $\sim 0.9^\circ$              |
|                                                                          | CMCC-ESM2        | $0.9^\circ \times 1.25^\circ$ |
| EC-Earth Climate Model Consortium/ EC-EARTH consortium                   | EC-Earth3-Veg-LR | $1.0^\circ \times 1.0^\circ$  |
| National Oceanic and Atmospheric Administration/ United States           | GFDL-ESM4        | $1.4^\circ \times 1.4^\circ$  |
| Institute for Numerical Mathematics/ Russia                              | INM-CM4-8        | $\sim 0.9^\circ$              |
| Institute Pierre Simon Laplace/ France                                   | IPSL-CM6A-LR     | $1.1^\circ \times 1.1^\circ$  |

144

### 145 **2.2 Reference data**

146 This study utilized re-gridded precipitation data derived from ERA5 reanalysis products  
 147 provided by the European Centre for Medium-Range Weather Forecasts (ECMWF). The  
 148 original ERA5 precipitation data, available at a  $0.25^\circ \times 0.25^\circ$  spatial resolution, was re-gridded  
 149 to a  $1.0^\circ \times 1.0^\circ$  resolution using the Python library xESMF. The data units were converted from  
 150 meters per day (m/day) to millimeters per day (mm/day) for consistency with other datasets.  
 151 The dataset is part of the FROGS (Frequent Rainfall Observations on Grids) database, which

152 integrates various precipitation products, including satellite-based, gauge-based, and reanalysis  
 153 data (Roca et al., 2019). The re-gridded dataset was selected for its spatial compatibility with  
 154 the study's objectives, facilitating the evaluation of General Circulation Model (GCM)  
 155 simulations in replicating observed precipitation patterns. The FROGS database provides a  
 156 robust framework for intercomparison and assessment of precipitation products across different  
 157 sources. FROGS database has been widely used in various studies to ensure the reliability of  
 158 climate model evaluation and climate change assessment (Wood et al., 2021; Roca and Fiolleau,  
 159 2020; Petrova et al., 2024).

160

### 161 **2.3 Quantile mapping**

162 This study employed three (Quantile delta mapping, QDM; Detrended quantile mapping, DQM;  
 163 Empirical quantile mapping, EQM) QM methods to correct the simulation of CMIP6 GCMs,  
 164 and these methods are commonly used in climate change research based on the climate models  
 165 (Switanek et al., 2017). This study divided the data into a training period (1980-1996) and a  
 166 validation period (1997-2014) to correct the historical period's data. This approach minimizes  
 167 the influence of uncertainties associated with future projections, allowing the study to focus on  
 168 evaluating the intrinsic performance differences of the QM methods. The frequency-adaptation  
 169 technique, as described by Themeßl et al. (2012), was applied to address potential biases and  
 170 improve the accuracy of the corrections. The corrected precipitation using the QM used a  
 171 cumulative distribution function, as shown in Equation 1, to reduce the difference from the  
 172 reference data.

$$173 \hat{x}_{m,p}(t) = F_{o,h}^{-1}\{F_{m,h}[x_{m,p}(t)]\} \quad (1)$$

174 where,  $\hat{x}_{m,p}(t)$  presents the bias-corrected results.  $F_{o,h}$  represents the cumulative distribution  
 175 function (CDF) of the observed data, and  $F_{m,h}$  presents the CDF of the model data. The  
 176 subscripts  $o$  and  $m$  denote observed and model data, respectively, and the subscript  $h$  denotes  
 177 the historical period.

178 QDM, developed by Cannon et al. (2015), preserves the relative changes ratio of modeled  
 179 precipitation quantiles. In this context, QDM consists of bias correction terms derived from  
 180 observed data and relative change terms obtained from the model. The computation process of  
 181 QDM is carried out as described in Equation (2) to (4).

$$182 \hat{x}_{m,p}(t) = \hat{x}_{o:m,h;p}(t) \cdot \Delta_m(t) \quad (2)$$

$$183 \hat{x}_{o:m,h;p}(t) = F_{o,h}^{-1}[F_{m,p}^{(t)}\{x_{m,p}(t)\}] \quad (3)$$

$$184 \quad \Delta_m(t) = \frac{x_{m,p}(t)}{F_{m,h}^{-1}[F_{m,p}^{(t)}\{x_{m,p}(t)\}]} \quad (4)$$

185 where,  $\hat{x}_{o:m,h:p}(t)$  presents the bias corrected daily precipitation for the historical period, and  
 186  $\Delta_m(t)$  the relative change in the model simulation between the reference period and the target  
 187 period. In addition, the target period is calculated by multiplying the relative change ( $\Delta_m(t)$ )  
 188 at time ( $t$ ) multiplied by the bias-corrected precipitation in the reference period.  $\Delta_m(t)$  is  
 189 defined as  $\widehat{x_{m,p}}(t)$  divided by  $F_{o,h}^{-1}[F_{m,p}^{(t)}\{x_{m,p}(t)\}]$ .  $\Delta_m(t)$  preserving the relative change  
 190 between the reference and target periods. DQM, while more limited compared to QDM,  
 191 integrates additional information regarding the projection of future precipitation. Furthermore,  
 192 climate change signals estimated from DQM tend to be consistent with signals from baseline  
 193 climate models. The computational process of DQM is performed as shown in Equation (5).

$$194 \quad \hat{x}_{m,p} = F_{o,h}^{-1} \left\{ F_{m,h} \left[ \frac{\bar{x}_{m,h} x_{m,h}(t)}{\bar{x}_{m,p}(t)} \right] \right\} \frac{\bar{x}_{m,p}(t)}{\bar{x}_{m,h}} \quad (5)$$

195 where,  $\bar{x}_{m,h}$  and  $\bar{x}_{m,p}$  represent the long-term modeled averages for the historical reference  
 196 period and the target period, respectively.

197 EQM is a method that corrects the quantiles of the empirical cumulative distribution function  
 198 from a GCM simulation based on a reference precipitation distribution using a corrected  
 199 transfer function (Dequé, 2007). The calculation process of EQM can be represented as follows  
 200 in Equation (6).

$$201 \quad \hat{x}_{m,p}(t) = F_{o,h}^{-1}(F_{m,h}(x_{m,p}(t))) \quad (6)$$

202 All these QMs can be applied to historical data correction in this approach. The bias correction  
 203 is performed based on the relative changes between a reference period and a target period in  
 204 the past, ensuring that the relative changes between these periods are preserved in the corrected  
 205 data (Ansari et al., 2023; Tanimu et al., 2024; Cannon et al., 2015).

206

## 207 **2.4 Evaluation metrics**

208 This study used ten evaluation metrics to assess the output performance of three quantile  
 209 mapping methods against the reference data for the validation period (1997-2014). **Ten**  
 210 **evaluation metrics used in this study are as follows: Root Mean Square Error (RMSE), Mean**  
 211 **Absolute Error (MAE), Coefficient of Determination ( $R^2$ ), Percent bias (Pbias), Nash-Sutcliffe**  
 212 **Efficiency (NSE), Kling-Gupta efficiency (KGE), Median Absolute Error (MdAE), Mean**  
 213 **Squared Logarithmic Error (MSLE), Explained Variance Score (EVS), and Jenson-Shannon**  
 214 **divergence (JS-D).** The equations of seven evaluation metrics are presented in Table 2.

| Metrics | Equations                                                                                           | Factors                                                                                            | References                     |
|---------|-----------------------------------------------------------------------------------------------------|----------------------------------------------------------------------------------------------------|--------------------------------|
| RMSE    | $= \sqrt{\frac{1}{n} \sum_{i=1}^n (X_i^{sim} - X_i^{ref})^2}$                                       |                                                                                                    |                                |
| MAE     | $= \sum_{i=1}^n  X_i^{sim} - X_i^{ref} $                                                            |                                                                                                    |                                |
| $R^2$   | $= 1 - \frac{\sum_{i=1}^n (X_i^{sim} - X_i^{ref})^2}{(X_i^{ref} - \bar{X}_i^{ref})^2}$              |                                                                                                    | Galton,<br>1886                |
| Pbias   | $= \frac{\sum_{i=1}^n (X_i^{ref} - X_i^{sim})}{\sum_{i=1}^n X_i^{ref}} \times 100$                  | $X_i^{ref}$ reference data<br>$X_i^{sim}$ Bias                                                     |                                |
| NSE     | $= 1 - \frac{\sum_{i=1}^n (X_i^{sim} - X_i^{ref})^2}{\sum_{i=1}^n (X_i^{ref} - \bar{X}_i^{ref})^2}$ | corrected GCM                                                                                      | Nash and<br>Sutcliffe,<br>1970 |
| MdAE    | $= \text{median}( X_i^{sim} - X_i^{ref} )$                                                          |                                                                                                    |                                |
| MSLE    | $= \frac{1}{n} \sum_{i=1}^n (\log(1 + X_i^{sim}) - \log(1 + X_i^{ref}))^2$                          |                                                                                                    |                                |
| EVS     | $= 1 - \frac{\text{Var}(X^{sim} - X^{ref})}{\text{Var}(X^{ref})}$                                   |                                                                                                    |                                |
| KGE     | $= 1 - \sqrt{(r - 1)^2 + (\alpha - 1)^2 + (\beta - 1)^2}$                                           | $r$ Pearson product-<br>moment<br>correlation<br>$\alpha$ Variability error<br>$\beta$ : Bias term | Gupta et<br>al. 2009           |

|      |                                                                                                                             |                                                                                                                                    |           |
|------|-----------------------------------------------------------------------------------------------------------------------------|------------------------------------------------------------------------------------------------------------------------------------|-----------|
| JS-D | $= \frac{1}{2}D_{KL} \left( P \parallel \frac{P+Q}{2} \right) + \frac{1}{2}D_{KL} \left( Q \parallel \frac{P+Q}{2} \right)$ | $P(x)$ : Probability density distribution of reference data<br>$Q(x)$ : Probability density distribution of GCM<br>$D_{KL}$ : KL-D | Lin, 1991 |
|------|-----------------------------------------------------------------------------------------------------------------------------|------------------------------------------------------------------------------------------------------------------------------------|-----------|

217

218 Ten evaluation metrics selected in this study assess GCM performance from various  
 219 perspectives, including error (RMSE, MAE, MdAE, and MSLE), deviation (Pbias), accuracy ( $R^2$ , NSE), variability (EVS), correlation and overall performance (KGE), and distributional  
 220 differences (JSD). These metrics complement each other by offering a comprehensive  
 221 evaluation framework. For instance, while NSE evaluates the overall fit of the simulated data  
 222 to observations, KGE provides a holistic view by integrating correlation, variability, and bias  
 223 into a single efficiency score, and JS-D captures the difference between the distributions of the  
 224 reference data and the bias-corrected GCM output.  
 225

226

## 227 2.5 Generalized extreme value

228 This study used generalized extreme value (GEV) to compare the extreme precipitation  
 229 calculated by the bias-corrected GCM at each grid of six continents over the historical period.  
 230 The historical precipitation was compared with the distribution of reference data and bias-  
 231 corrected GCM above the 95th quantile of the Probability Density Function (PDF) of the GEV  
 232 distribution (Hosking et al. 1985). In addition, this study compared the distribution differences  
 233 between the reference data based on the GEV distribution and the corrected GCM using JSD.  
 234 GEV distribution is commonly used to confirm extreme values in climate variables. The PDF  
 235 of the GEV distribution is shown in Equation 7, and the parameters of the GEV distribution  
 236 were estimated using L-moment (Hosking, 1990).

$$237 \quad g(x) = \frac{1}{\alpha} \left[ 1 - k \frac{x-\epsilon}{\alpha} \right]^{\frac{1}{k}-1} \exp \left\{ - \left[ 1 - k \frac{x-\epsilon}{\alpha} \right]^{\frac{1}{k}} \right\} \quad (7)$$

238 where,  $k$ ,  $\alpha$ , and  $\epsilon$  represents a shape, scale, and location of the GEV distribution, respectively.

239

## 240 2.6 Bayesian model averaging (BMA)

241 The BMA is a statistical technique that combines multiple models to provide predictions that  
 242 account for model uncertainty (Hoeting et al., 1999). BMA is used to integrate predictions from  
 243 GCMs to improve the robustness and reliability of the resulting assemblies. The posterior  
 244 probability of each model is calculated based on Bayes' theorem as shown in Equation 8.

$$245 \quad P(M_k | D) = \frac{P(D|M_k)P(M_k)}{\sum_{j=1}^K P(D|M_j)P(M_j)} \quad (8)$$

246 where,  $P(M_k)$  is the prior probability of model  $M_k$ , and  $P(D | M_k)$  is the likelihood of the data  
 247  $D$  given model  $M_k$ ,  $P(M_k | D)$  is the posterior probability of model  $M_k$ . In addition, the BMA  
 248 prediction  $\hat{Q}_{BMA}$  is the weighted average of the predictions from each model as shown in  
 249 Equation 9.

$$250 \quad \hat{Q}_{BMA} = \sum_{k=1}^K P(M_k | D) \hat{Q}_k \quad (9)$$

251 where,  $\hat{Q}_k$  is the prediction from model  $M_k$ . In this study, BMA was used to quantify the model  
 252 uncertainty and ensemble prediction uncertainty for daily precipitation corrected by three QM  
 253 methods (QDM, EQM, and DQM) applied to 11 CMIP6 GCMs, as shown in Equations 10 and  
 254 11.

$$255 \quad \alpha_w^2 = \frac{1}{K} \sum_{k=1}^K (w_k - \bar{w})^2 \quad (10)$$

256 where,  $K$  is the number of models,  $w_k = P(M_k | D)$  is the weight of model  $M_k$ ,  $\bar{w}$  is the mean  
 257 of the weights, given by  $\bar{w} = \frac{1}{K} \sum_{k=1}^K w_k$ . A higher variance in model weights indicates more  
 258 significant prediction differences, implying greater model uncertainty.

$$259 \quad \sigma_{BMA} = \sqrt{\frac{1}{K} \sum_{k=1}^K (\hat{Q}_k - \hat{Q}_{BMA})^2} \quad (11)$$

260  $\sigma_{BMA}$  is standard deviation of the BMA ensemble predictions,  $\hat{Q}_k$  is the prediction from each  
 261 model  $M_k$ ,  $\hat{Q}_{BMA}$  is the weighted average prediction from BMA. This standard deviation  
 262 represents the variability among the ensemble predictions and serves as an indicator of  
 263 uncertainty. A lower standard deviation implies higher consistency among predictions,  
 264 indicating lower uncertainty, while a higher standard deviation suggests greater variability and  
 265 higher uncertainty.

266

## 267 **2.7 TOPSIS**

268 This study used TOPSIS to calculate a rational priority among three QM methods based on the  
 269 outcomes derived from evaluation metrics. Furthermore, the closeness coefficient calculated  
 270 using TOPSIS was used as the performance metric for the CI. Proposed by Hwang and Yoon



271 (1981), TOPSIS is a multi-criteria decision-making technique frequently used in water  
 272 resources and climate change research to select alternatives (Song et al., 2024). As described  
 273 in Equation 12 and 13, the proximity of the three QM methods is calculated based on the  
 274 Positive Ideal Solution (PIS) and the Negative Ideal Solution (NIS).

$$275 \quad D_i^+ = \sqrt{\sum_{j=1}^n w_j (f_j^+ - f_{i,j})^2} \quad (12)$$

$$276 \quad D_i^- = \sqrt{\sum_{j=1}^n w_j (f_j^- - f_{i,j})^2} \quad (13)$$

277 where,  $D_i^+$  is the Euclidean distance of each criterion from the PIS, summing the whole criteria  
 278 for an alternative  $f_j^+$ ,  $j$  presents the normalized value for the alternative  $f_j^+$ .  $w_j$  presents weight  
 279 assigned to the criterion  $j$ .  $D_i^-$  is the distance between the alternative  $f_j^-$  and the NIS. The  
 280 relative closeness is calculated as shown in Equation 14. The optimal value is closer to 1 and  
 281 represents a reasonable alternative.

$$282 \quad C_i = \frac{D_i^-}{(D_i^- + D_i^+)} \quad (14)$$

283 **This study used entropy theory to calculate the weights for each criterion. Entropy weighting**  
 284 **ensures sufficient objectivity by calculating weights based on the variability and distribution**  
 285 **of data. This approach minimizes subjectivity, preventing biases in the weighting process.**

286

## 287 **2.8 Comprehensive index (CI)**

288 This study proposed a CI to select the best QM method by combining performance scores and  
 289 model uncertainty indicators. The CI integrates the performance scores (closeness coefficient)  
 290 derived from the TOPSIS method with the uncertainty quantified using BMA. This approach  
 291 allows for a balanced evaluation that considers both the effectiveness of the QM methods and  
 292 the associated uncertainties. Uncertainty was quantified in two ways. Model-specific weight  
 293 variance was calculated using the variance of the model weights assigned by BMA,  
 294 representing the uncertainty in selecting the appropriate QM. The standard deviation of BMA  
 295 ensemble prediction was calculated to capture the spread and, thus, the uncertainty of the  
 296 ensemble forecasts. Both the indicators were normalized using a min-max scaler to ensure  
 297 comparability. **The CI is calculated individually for every grid and can reflect climate**  
 298 **characteristics. Framework provides flexibility in determining the weighting of uncertainty or**  
 299 **performance depending on the study objectives. Additionally, the methodology offers**  
 300 **flexibility in selecting performance and uncertainty metrics. Alternative MCDA methods**

301 beyond TOPSIS can be utilized for performance indicators, or indices that effectively represent  
302 the model's performance can be employed to calculate the CI. Similarly, for uncertainty  
303 indicators, approaches such as variance, standard deviation, or other uncertainty quantification  
304 techniques can be applied to enhance the robustness of the framework further. Finally, the  
305 calculation process of the CI is performed as shown in Equations 15 and 16.

$$306 \quad UI = \frac{V_w + \sigma_e}{2} \quad (15)$$

$$307 \quad CI = \alpha \times C_i - \beta \times UI \quad (16)$$

308 where,  $UI$  represents the uncertainty indicator.  $V_w$  and  $\sigma_e$  represent the normalized weight  
309 variance and the normalized ensemble standard deviation, respectively, calculated using BMA.  
310  $C_i$  represents the closeness coefficient calculated from TOPSIS.  $\alpha$  represents the weight given  
311 to the performance score,  $\beta$  represents the weight given to the uncertainty indicator.  
312 Furthermore, by adjusting the weights  $\alpha$  and  $\beta$ , the study evaluated the QM methods under  
313 different scenarios. Equal weight ( $\alpha = 0.5$ ,  $\beta = 0.5$ ) balances performance and uncertainty  
314 equally, and the emphasized performance weight ( $\alpha = 0.7$ ,  $\beta = 0.3$ ) prioritize performance over  
315 uncertainty. The emphasized uncertainty weight ( $\alpha = 0.3$ ,  $\beta = 0.7$ ) prioritize uncertainty over  
316 performance. The results from the CI provide a holistic evaluation of the QM methods,  
317 considering both their effectiveness in bias correction and the reliability of their predictions.

318

### 319 **3. Result**

#### 320 **3.1 Assessment of bias correction reproducibility across continents**

##### 321 **3.1.1 Comparison of bias correction effects**

322 A Taylor diagram was used to compare the bias-corrected and raw GCM precipitation with the  
323 observed data, and Figure 1 presents the results of applying the three QM methods to 11 CMIP6  
324 GCMs. In general, the precipitation corrected by DQM showed a larger difference from the  
325 reference data than other methods. In contrast, EQM performed better than DQM, and many  
326 models showed results close to the reference data. The precipitation corrected by QDM also  
327 showed good performance in most continents but slightly lower than EQM. Nevertheless,  
328 QDM showed clearly better results than DQM.

329 Regarding correlation coefficients, precipitation corrected by DQM showed relatively high  
330 values between 0.8 and 0.9 but lower than EQM and QDM. The precipitation corrected by  
331 EQM showed high agreement with the reference data, recording correlation coefficients above

332 0.9 in most continents. QDM generally showed similar correlation coefficients to EQM but  
333 slightly lower values than EQM in North America and Asia.

334 For RMSE, precipitation corrected by DQM was higher than EQM and QDM, indicating that  
335 the corrected precipitation differed more from the reference data. On the other hand, EQM had  
336 the lowest RMSE and showed superior performance compared to other methods. QDM had  
337 slightly higher RMSE than EQM but still outperformed DQM.

338 In terms of standard deviation, precipitation corrected by DQM was higher or lower than the  
339 reference data in most continents. On the other hand, precipitation corrected by EQM was  
340 similar to the reference data and almost identical to the reference data in Africa and Asia. QDM  
341 was similar to the reference data in some continents but showed slight differences from EQM.

342 These results imply that the precipitation corrected by the three methods outperforms the raw  
343 simulation, which confirms that the GCM's daily precipitation is reliably corrected in the  
344 historical period.

345

### Taylor diagram

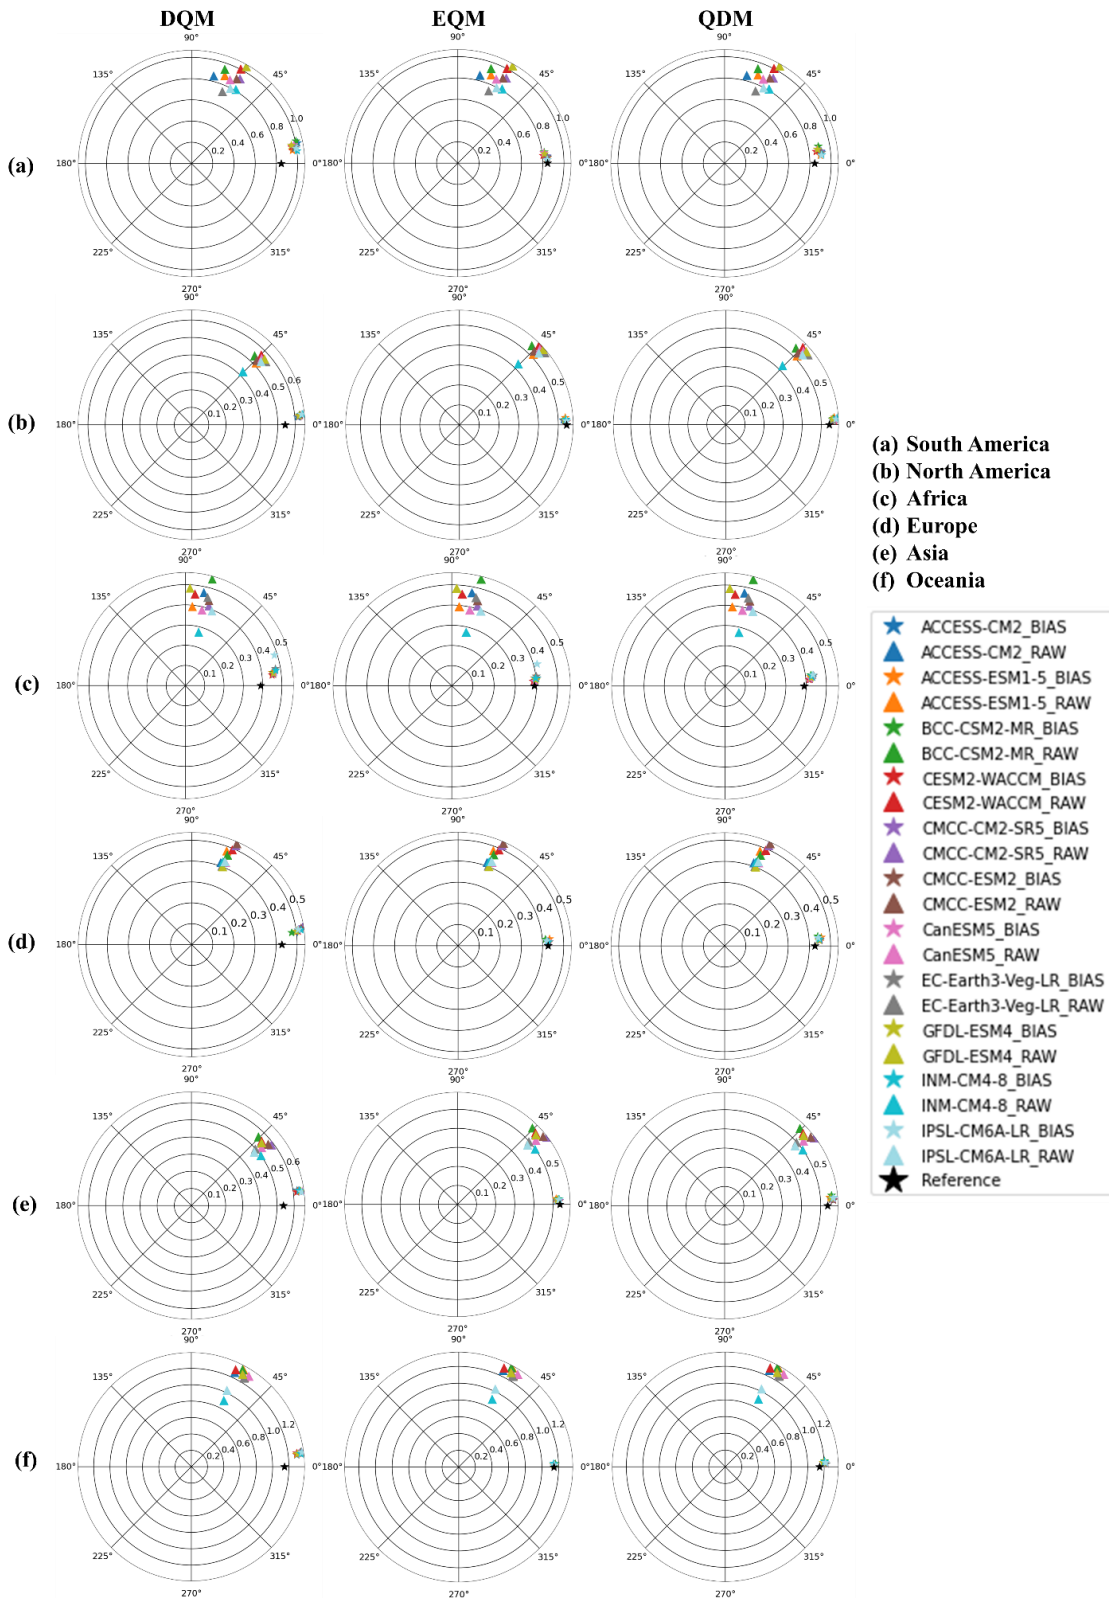

346

347 Figure 1. Comparison of raw and corrected daily precipitation on six continents using Taylor

348 diagrams

349 **3.1.2 Spatial distribution of bias correction performance**

350 The spatial patterns of the evaluation metrics computed from the bias-corrected daily  
351 precipitation data of GCMs in South America are presented as shown in Figures 2 and S1.

352 Overall, the precipitation corrected by EQM demonstrated lower JSD values, as well as higher  
353 EVS and KGE values, compared to other methods. The precipitation corrected by EQM  
354 showed higher EVS in certain regions but slightly lower performance in MDAE and Pbias  
355 across some grids. DQM exhibited performance similar to EQM and QDM in most evaluation  
356 indices but was relatively lower in most evaluation metrics. The precipitation corrected by the  
357 three methods was underestimated compared to the reference data in northern South America,  
358 while it was overestimated in eastern South America. In addition, precipitation corrected by  
359 the DQM method tended to be overestimated more than the other methods, while the EQM  
360 method showed the opposite result. Furthermore, the daily precipitation corrected by EQM  
361 showed the lowest overall error and high performance in both NSE and  $R^2$ . QDM and DQM  
362 also performed well but exhibited slightly larger errors in some regions than EQM.

363

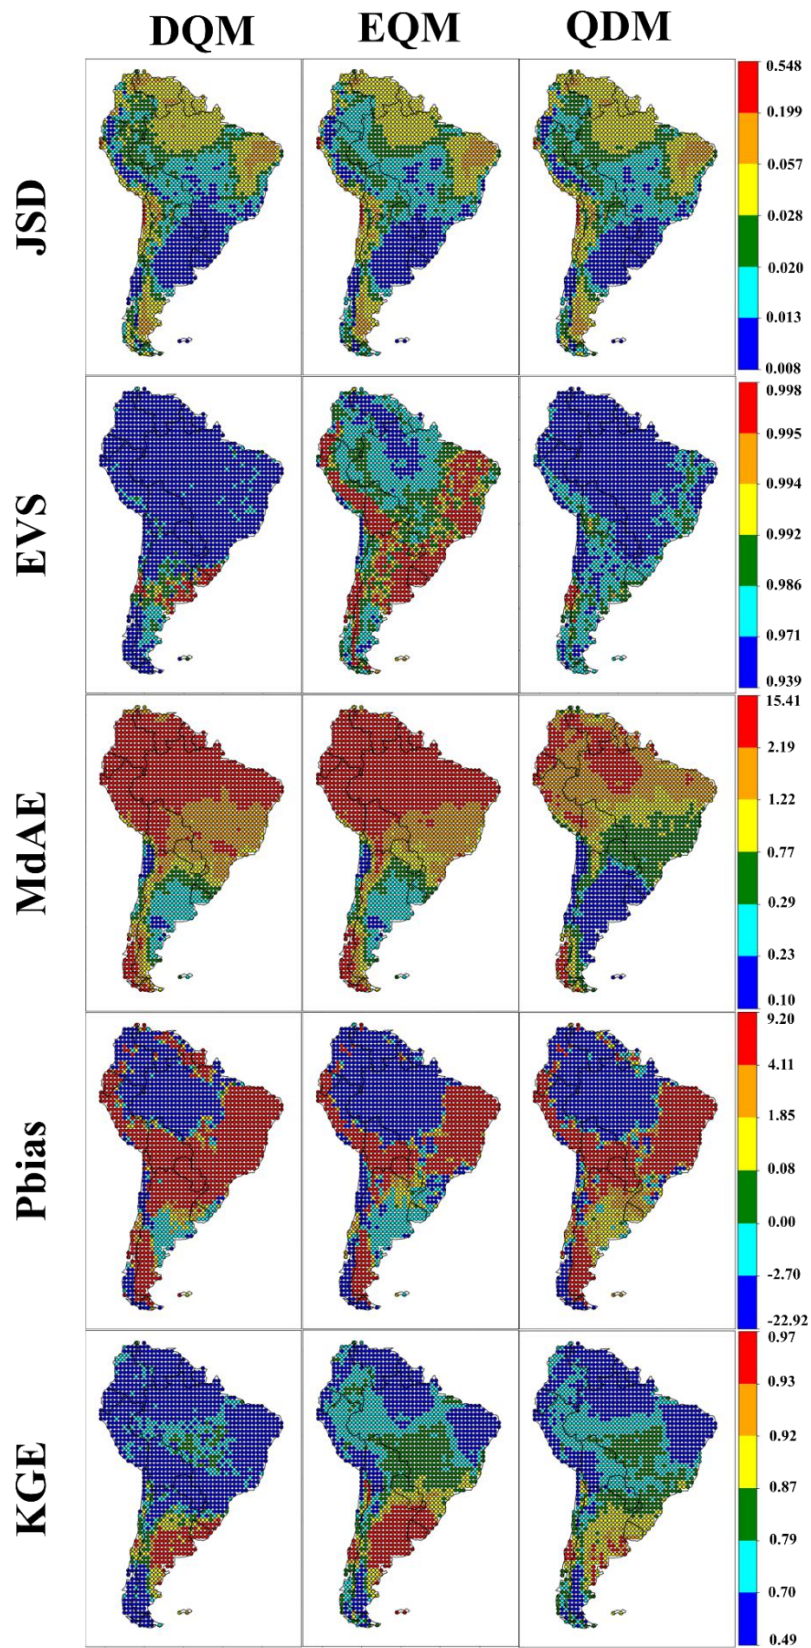

364

365 Figure 2. Performance comparison of DQM, EQM, and QDM using evaluation metrics (JSD,

366 EVS, MdAE, Pbias, and KGE) for daily precipitation in South America.



367 **Figures 3 and S2 present the spatial patterns of these evaluation metrics, calculated for daily**  
368 **precipitation from the bias corrected GCMs in North America.** Regarding error metrics (MAE,  
369 MSLE, RMSE, and MdAE), precipitation corrected using DQM showed relatively lower  
370 performance across North America, with substantial errors in the southern region. In contrast,  
371 precipitation corrected using EQM demonstrated superior performance across the continent  
372 compared to other methods. QDM exhibited similar error performance to EQM but slightly  
373 higher errors in the southern region.

374 For correlation metrics (NSE and  $R^2$ ), DQM-corrected precipitation had lower performance  
375 than other methods, although some grid cells in the central and eastern regions showed high  
376 performance, with values exceeding 0.995. The precipitation corrected using EQM showed the  
377 highest performance, especially in the central and eastern regions, where most grid points  
378 showed correlation coefficients above 0.995. QDM, while achieving correlation metrics above  
379 0.978 for most grid points, had slightly lower performance than the other methods.

380 Regarding Pbias, all three methods tended to overestimate precipitation relative to the reference  
381 data across most grid points in North America, while corrected precipitation in Greenland was  
382 underestimated. For JSD, EVS, and KGE metrics, EQM-corrected precipitation showed the  
383 highest performance, with DQM and QDM performing lower than EQM.

384

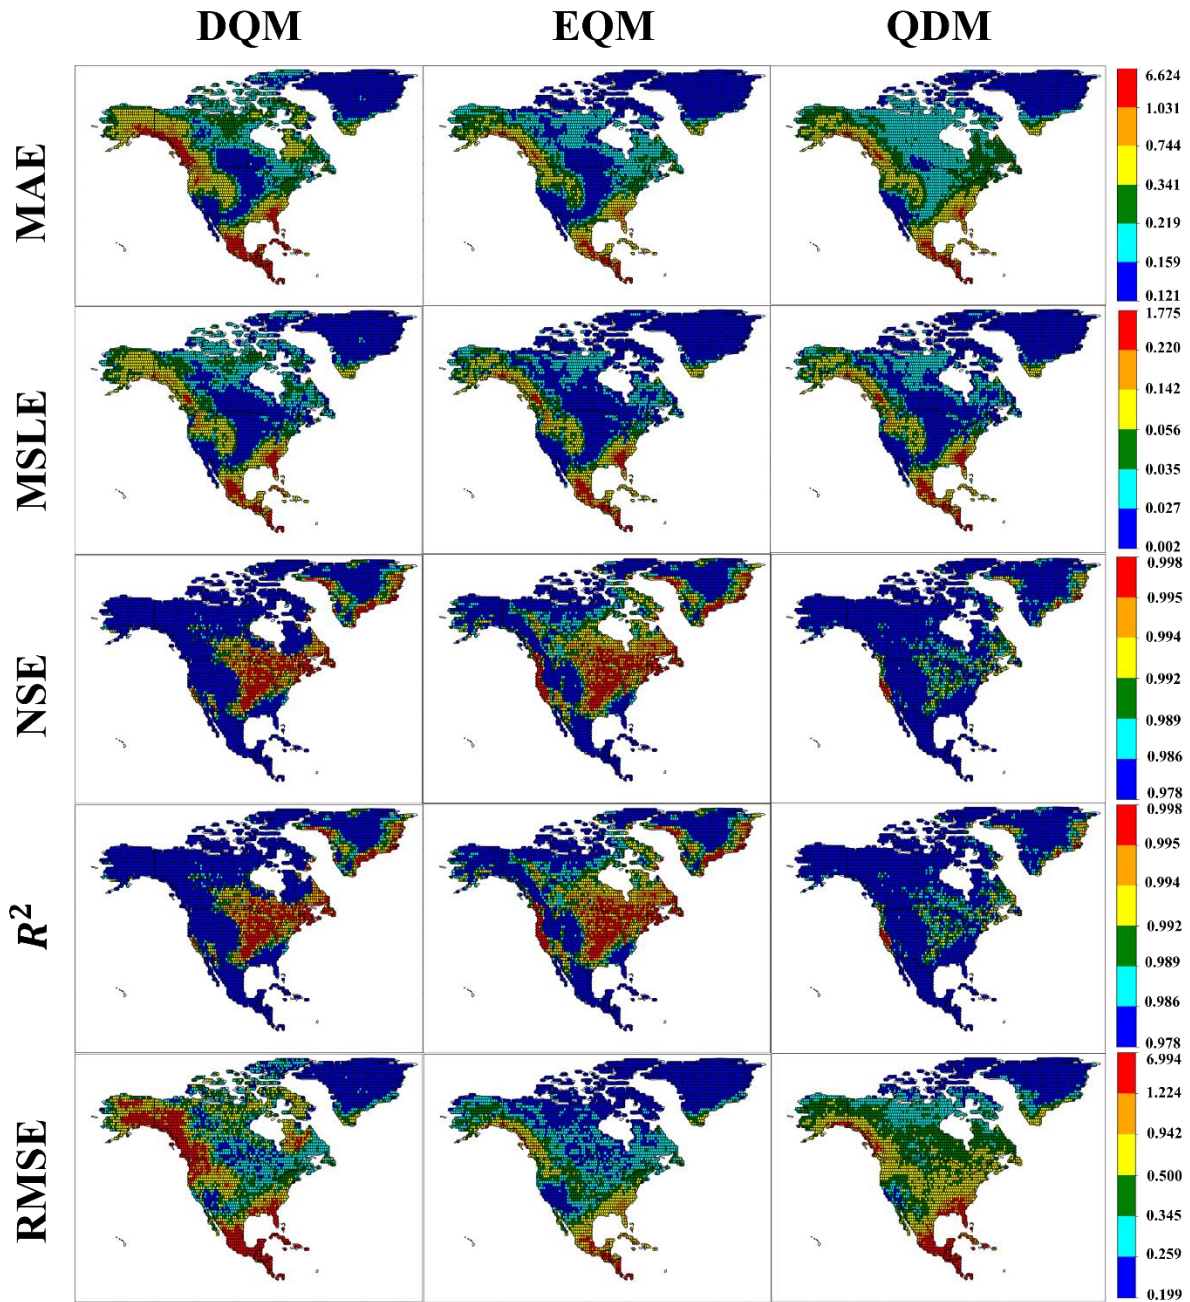

385  
 386 Figure 3. Performance comparison of DQM, EQM, and QDM using evaluation metrics (MAE,  
 387 MSLE, NSE,  $R^2$ , and RMSE) for daily precipitation in North America.

388  
 389 In this study, the daily precipitation in Africa was corrected using three QM methods, and the  
 390 performance is shown in Figures 4 and S3. Overall, the JSD of precipitation corrected by the  
 391 three methods showed similar spatial patterns, but the precipitation of DQM showed lower  
 392 performance than the other methods in the southern region. In terms of EVS, the precipitation  
 393 of DQM showed higher variability than the other methods. The precipitation of QDM showed



394 lower variability in southern Africa than DQM, but overall, it showed higher variability than  
395 EQM. The precipitation of EQM showed lower variability in southern and central Africa but  
396 still showed high variability in the northern region. Analyzing the error performance, the  
397 precipitation corrected by QDM showed the best performance compared to the other methods.  
398 In particular, QDM showed the highest performance in North Africa (MAE: 0.03, and MSLE:  
399 0.004), and EQM's error performance was lower than QDM's in most indicators but better than  
400 DQM's. Finally, EQM performed the highest in correlation metrics (NSE and  $R^2$ ), and QDM  
401 performed better than DQM.

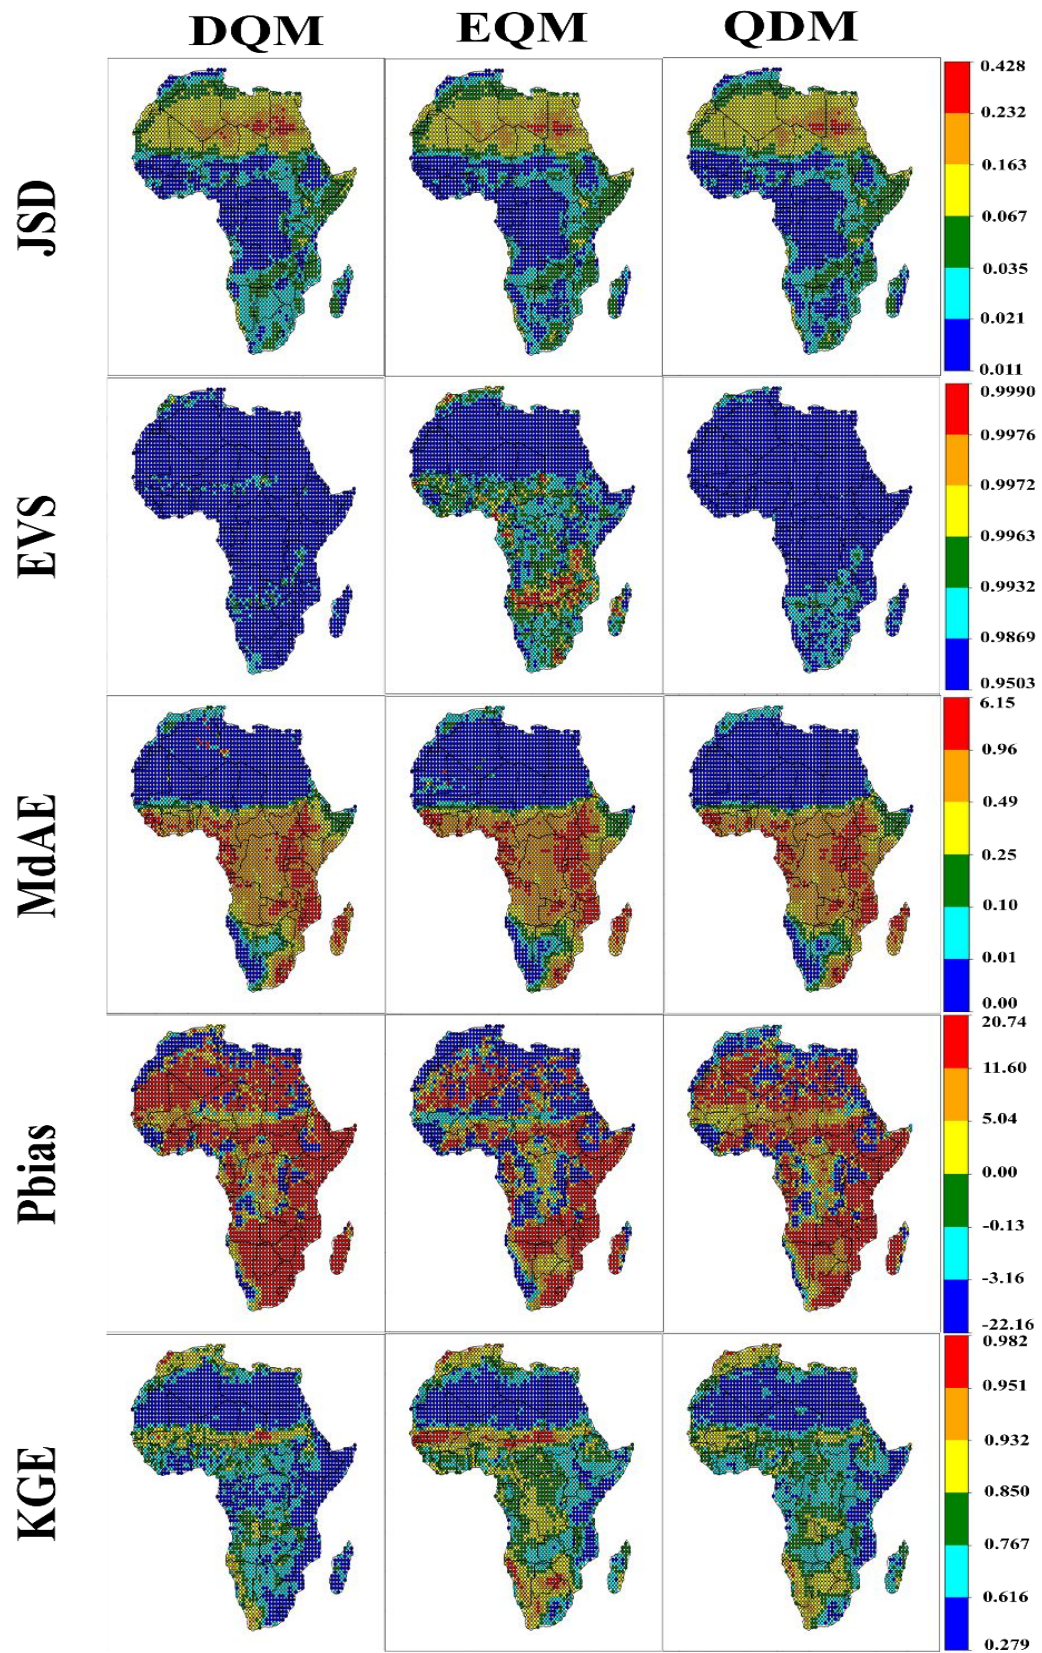

402

403 Figure 4. Performances of DQM, EQM, and QDM using evaluation metrics (JSD, EVS, MdAE,

404 Pbias, and KGE) for daily precipitation in Africa.

405 Figures 5 and S4 show the spatial results of the grid-based evaluation metrics for the European  
406 region. In terms of error metrics, EQM-corrected precipitation performed the best across  
407 Europe compared to other methods. In contrast, QDM-corrected precipitation performed  
408 similarly to DQM in MAE and MSLE but significantly outperformed DQM in RMSE.  
409 Regarding NSE and R, EVS, and KGE metrics, EQM-corrected precipitation performed  
410 overwhelmingly better than other methods. QDM precipitation performed better than DQM,  
411 while DQM performed the worst. Regarding Pbias, EQM-corrected precipitation was  
412 underestimated compared to the reference data in most parts of Europe. In contrast, QDM-  
413 corrected precipitation was more similar to the reference data compared to other methods, and  
414 DQM precipitation was overestimated compared to the reference data except in central Europe.

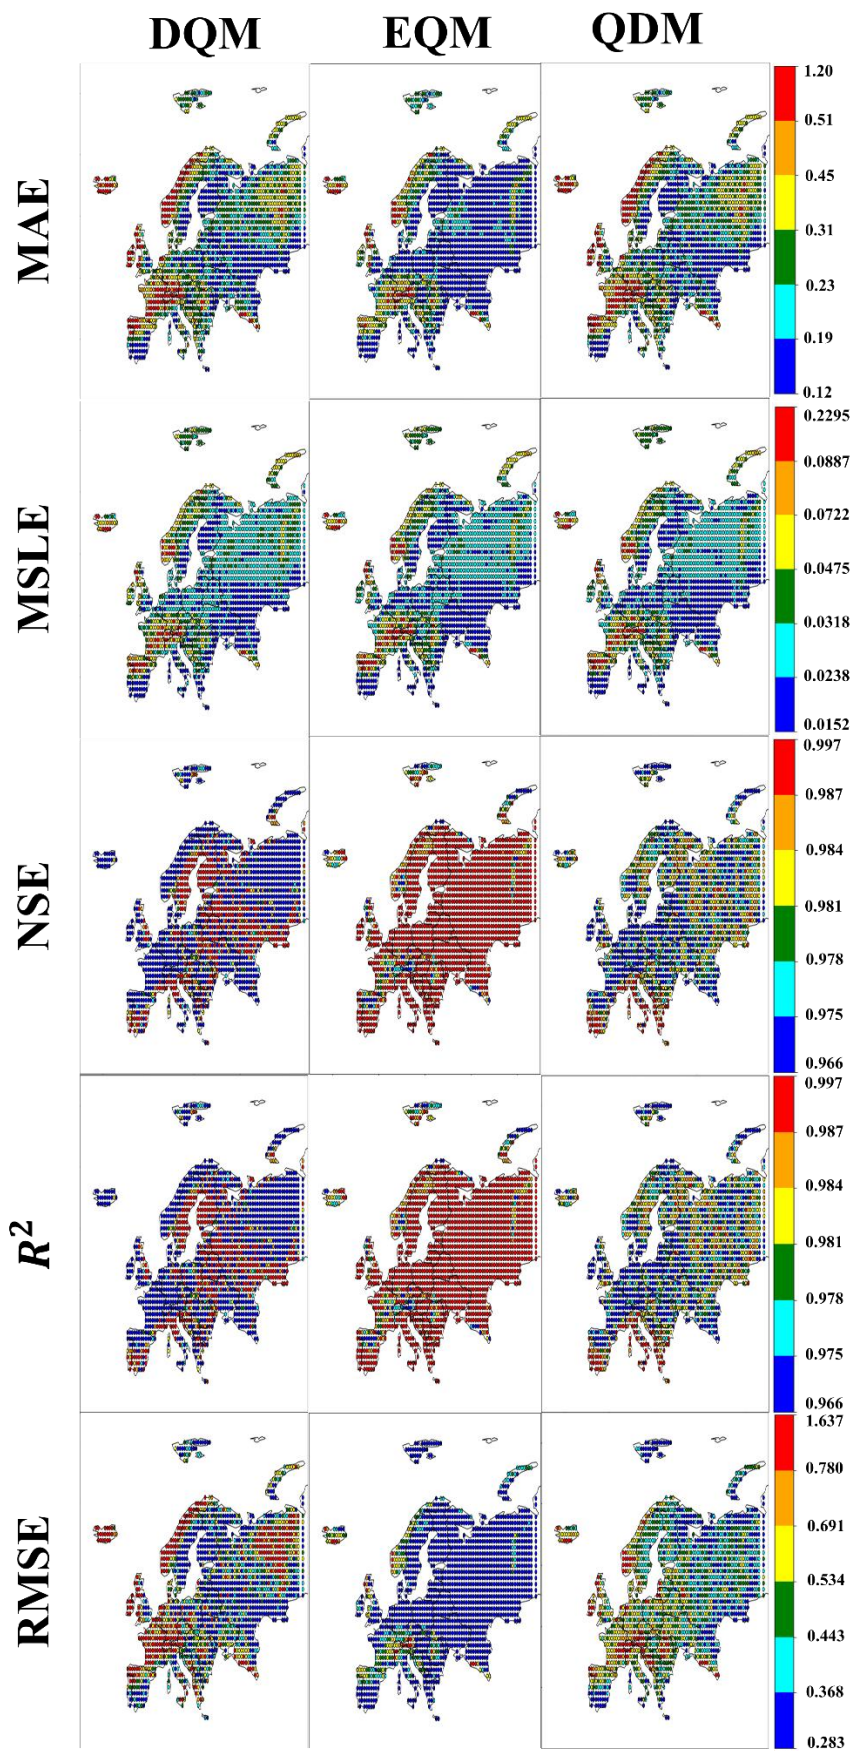

416 Figure 5. Performances of DQM, EQM, and QDM using evaluation metrics (MAE, MSLE,  
417 NSE,  $R^2$ , and RMSE) for daily precipitation in Europe.

418 Figures 6 and S5 show the results of spatially quantifying the corrected precipitation in Asia  
419 using various evaluation metrics. Regarding error metrics, EQM-corrected precipitation stands  
420 out with its superior performance, particularly in RMSE, which was consistently below 1.35 in  
421 most areas except for certain parts of Central Asia. In contrast, DQM-corrected precipitation  
422 showed the poorest performance in error metrics. QDM-corrected precipitation demonstrated  
423 a performance similar to EQM but slightly lower in East Asia and North Asia. In NSE and R,  
424 the precipitation corrected by EQM performed better than other methods, especially in  
425 Southwest and East Asia. In contrast, the precipitation corrected by DQM performed lower  
426 than other methods. Regarding EVS, the precipitation corrected by EQM showed the lowest  
427 variability, while QDM showed higher variability than EQM but lower variability than DQM.  
428 In the case of Pbias, precipitation corrected by DQM was overestimated compared to the  
429 reference data throughout Asia. The precipitation corrected by EQM was underestimated in  
430 most regions except Central Asia. Precipitation in QDM showed a similar spatial pattern to that  
431 in EQM, but the range of Pbias was more diverse.

432



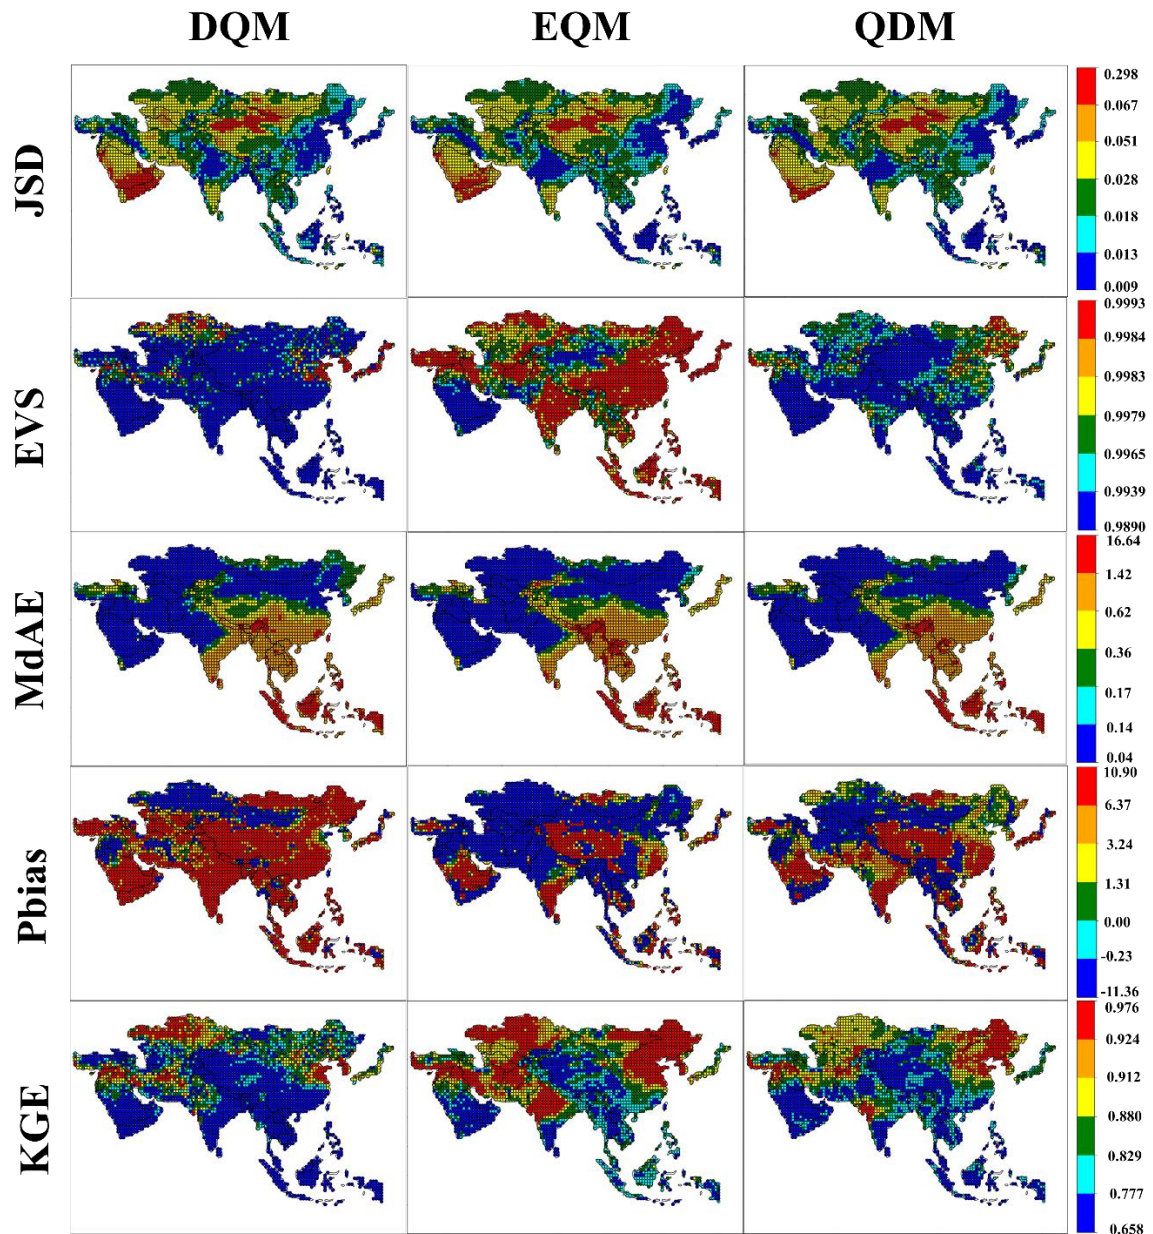

433

434 Figure 6. Performances of DQM, EQM, and QDM using evaluation metrics (JSD, EVS, MdAE,  
 435 Pbias, and KGE) for daily precipitation in Asia.

436

437 Figures 7 and S6 show the results of spatially quantifying the corrected daily precipitation in  
 438 Oceania using various evaluation metrics. In terms of error metrics, the precipitation estimated  
 439 by the three QM methods performed similarly in MAE, MdAE, and MSLE. However, the  
 440 precipitation corrected by EQM performed better in RMSE than the other methods. In the case  
 441 of JSD, all three methods performed well.

442 Regarding EVS, the precipitation corrected by EQM showed lower variability than the other  
443 methods, and DQM showed higher performance than QDM. In Pbias, the precipitation adjusted  
444 by QDM was overestimated compared to the reference data in Oceania, while the precipitation  
445 corrected by DQM and EQM was underestimated compared to the reference data in central and  
446 southern Oceania. Finally, in KGE, precipitation corrected by EQM showed the highest  
447 performance, while DQM showed the lowest.



448

449 Figure 7. Performances of DQM, EQM, and QDM using evaluation metrics (MAE, MSLE,

450 NSE,  $R^2$ , and RMSE) for daily precipitation in Oceania.



451 Figure 8 visualizes the results of evaluating the bias-corrected precipitation data using 11  
452 CMIP6 GCMs on six continents using ten evaluation metrics as boxplots. Overall, the  
453 precipitation corrected by EQM outperforms the other methods on most continents. In  
454 particular, EQM performs the best on the error metrics. QDM performs slightly lower than  
455 EQM but still maintains a high level of performance on all continents. On the other hand, DQM  
456 has more significant errors and relatively poor performance compared to the other methods on  
457 most metrics.

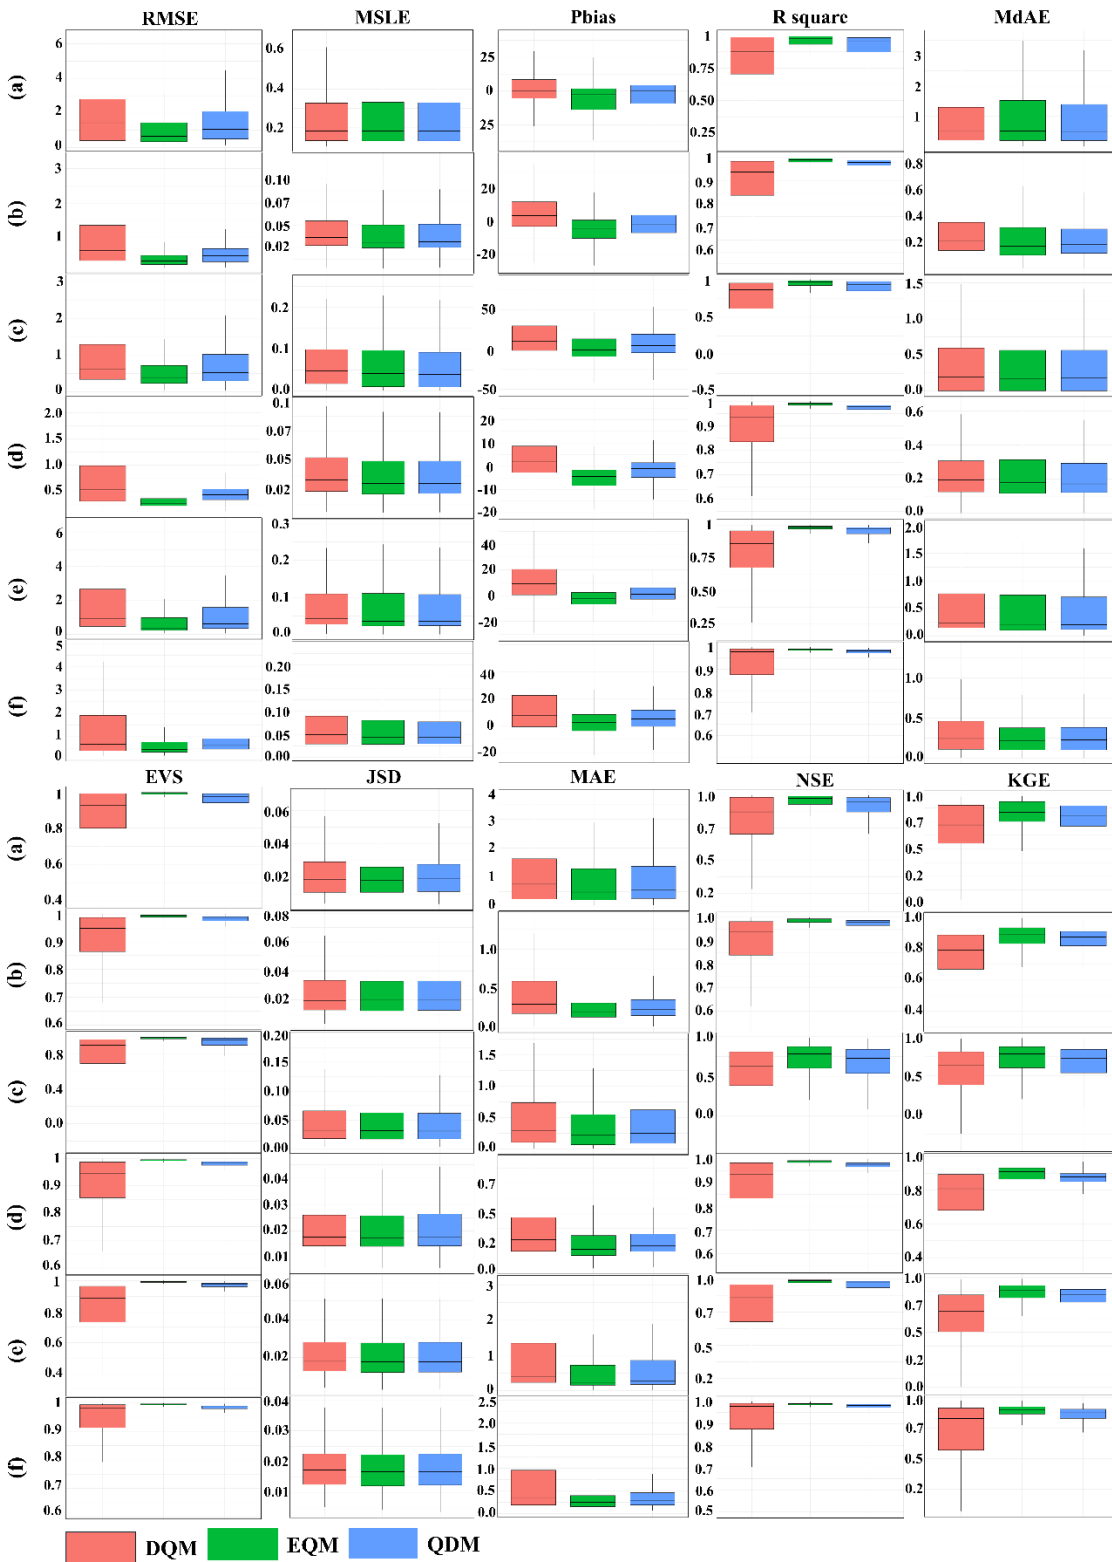

(a) South America (b) North America (c) Africa (d) Europe (e) Asia (f) Oceania

458

459 Figure 8. Performances of DQM, EQM, and QDM of historical period precipitation using

460 boxplots based on ten evaluation metrics

461

462 **3.1.3 Comparison of reproducibility for extreme daily precipitation**

463 This study compared the daily extreme precipitation corrected by three methods using the GEV  
464 distribution. **Figure 9 compares the distribution differences of the daily precipitation adjusted**  
465 **by the bias correction methods based on the GEV distribution using the JSD.** In general, the  
466 JSD values for precipitation from DQM, EQM, and QDM are very low for most continents,  
467 indicating that the GEV distributions are almost identical among the three methods. Although  
468 there are some outliers, the overall distribution differences are not significant, suggesting little  
469 difference among the three methods when correcting for historical precipitation. However, in  
470 Europe, unlike other continents, the differences between the first and third quartiles of the JSD  
471 are relatively significant, indicating that the distributions can vary significantly from grid  
472 grid depending on the QM method.  
473

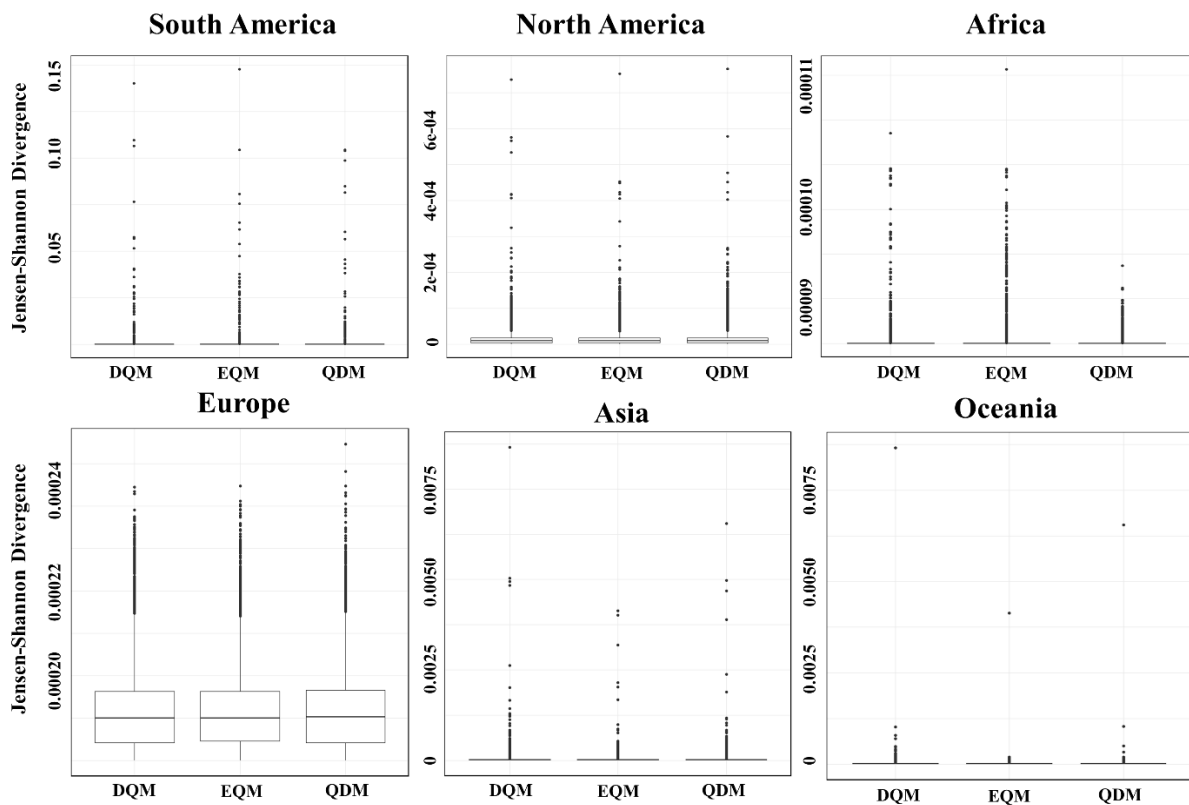

474  
475 Figure 9. Comparison of distribution differences for GEV distribution using JSD across six  
476 continents.

477  
478 Figure 10 shows the probability density functions for extreme precipitation above the 95th  
479 percentile of the GEV distribution. Overall, DQM shows the highest probability density for

480 extreme precipitation across all continents and has the widest distribution, indicating that DQM  
 481 corrects more extreme precipitation. On the other hand, EQM shows the lowest probability  
 482 density and conservatively corrects for extreme precipitation. QDM shows probability  
 483 densities between EQM and DQM across most continents but closer to EQM.

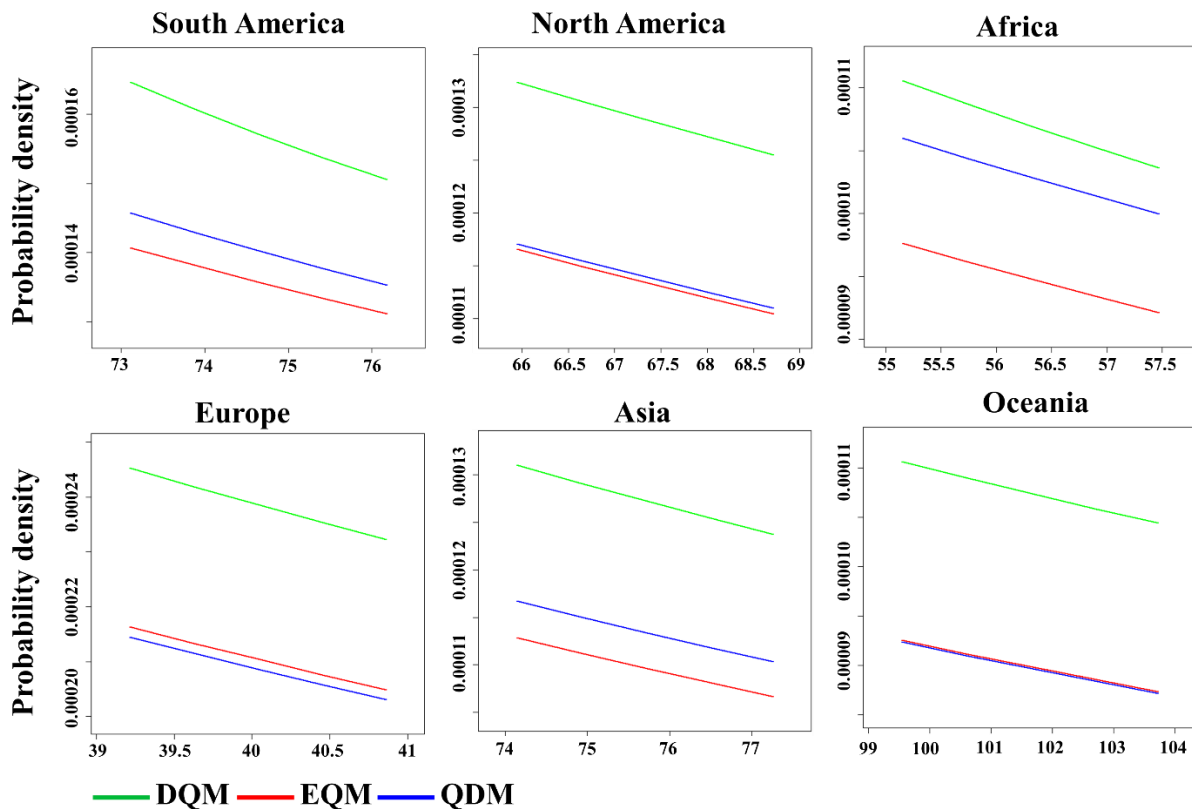

484  
 485 Figure 10. Comparison of probability densities for extreme precipitation values above the 95th  
 486 percentile using GEV.

487  
 488 **3.2 Prioritization of bias correction methods based on performance**

489 **3.2.1 Results of weight for evaluation metrics**

490 In this study, the weights were calculated by applying entropy theory to the evaluation metrics  
 491 used in the TOPSIS analysis, and the results are presented in Table 3. JSD had the highest  
 492 weight in South America because the estimated JSD from 11 CMIP6 GCMs was an important  
 493 metric for evaluating model performance differences. These results indicate that the differences  
 494 between distributions are significant. On the other hand, EVS and NSE in South America had  
 495 very low weights, suggesting that the variability and efficiency of precipitation were considered  
 496 less important than other indicators. For North America, the RMSE, MSLE, and MAE metrics  
 497 were of significant importance, as evidenced by their high weights. These error metrics

498 revealed substantial regional differences. In contrast, EVS carried a negligible weight,  
 499 suggesting it was less important in explaining variability in North America. For Africa, MdAE  
 500 and JSD metrics were of considerable importance, as indicated by their high weights. These  
 501 metrics were key evaluation factors in Africa. Conversely, EVS carried a low weight,  
 502 suggesting it was considered relatively less important. RMSE had the highest weight in Europe,  
 503 and KGE also had a relatively high weight, indicating that these metrics were considered  
 504 important evaluation criteria in Europe. In Asia, MAE and MSLE had high weights, suggesting  
 505 that these metrics were important evaluation metrics. On the other hand, EVS and NSE were  
 506 considered less important due to their low variability. **In Oceania, high weights were assigned**  
 507 **to JSD, KGE, RMSE, and MAE, suggesting that these metrics are critical for evaluating model**  
 508 **performance.** On the other hand,  $R^2$  and NSE were assigned low weights.

509  
 510 Table 3. Entropy-based weights for evaluation metrics across different continents

|                  | RMS<br>E | MAE    | $R^2$   | NSE     | KGE    | Pbias  | MdAE   | MSLE   | EVS     | JSD    |
|------------------|----------|--------|---------|---------|--------|--------|--------|--------|---------|--------|
| South<br>America | 0.1439   | 0.1536 | 0.0001  | 0.0001  | 0.0005 | 0.0238 | 0.1754 | 0.1934 | 0.0004  | 0.3088 |
| North<br>America | 0.2289   | 0.1908 | 0.0001  | 0.0001  | 0.0007 | 0.0118 | 0.2152 | 0.2117 | 0.0001  | 0.1411 |
| Africa           | 0.1319   | 0.1686 | 0.0002  | 0.0002  | 0.0002 | 0.0855 | 0.2436 | 0.1911 | 0.0002  | 0.1786 |
| Europe           | 0.2821   | 0.1762 | 0.0022  | 0.0022  | 0.0063 | 0.0378 | 0.1754 | 0.1666 | 0.0021  | 0.1490 |
| Asia             | 0.2073   | 0.1954 | 0.00003 | 0.00003 | 0.0001 | 0.0305 | 0.2300 | 0.2024 | 0.00003 | 0.1342 |
| Oceania          | 0.2384   | 0.2204 | 0.0013  | 0.0013  | 0.0068 | 0.0214 | 0.2338 | 0.2093 | 0.0012  | 0.0660 |

511  
 512 **3.2.2 Selection of the best bias correction method based on TOPSIS**  
 513 Figures 11 and S7 present the best bias correction method selected for each continent using the  
 514 TOPSIS approach. In Figure 11(a), the spatial distribution of the most effective bias correction  
 515 method across the grid points of each continent is shown. In contrast, Figure 11(b) shows the  
 516 number of grid points selected for each QM method. In South America, EQM was chosen as  
 517 the best method in most grid points, with EQM being selected in over 1,500 grid points. In  
 518 contrast, QDM was selected in fewer than 700 grid cells, making it the least chosen method in  
 519 South America. Across all continents except South America, EQM was selected as the best  
 520 model in the majority of grid cells, with the number of selected grid points (North America:  
 521 7,583; Africa: 2,879; Europe: 2,719; Asia: 8,793; and Oceania: 1,659). On the other hand,

522 DQM was the least chosen method across all continents. For QDM, although it was the second  
 523 most selected method across all continents except South America, the difference in the number  
 524 of grid points between QDM and EQM is significant.

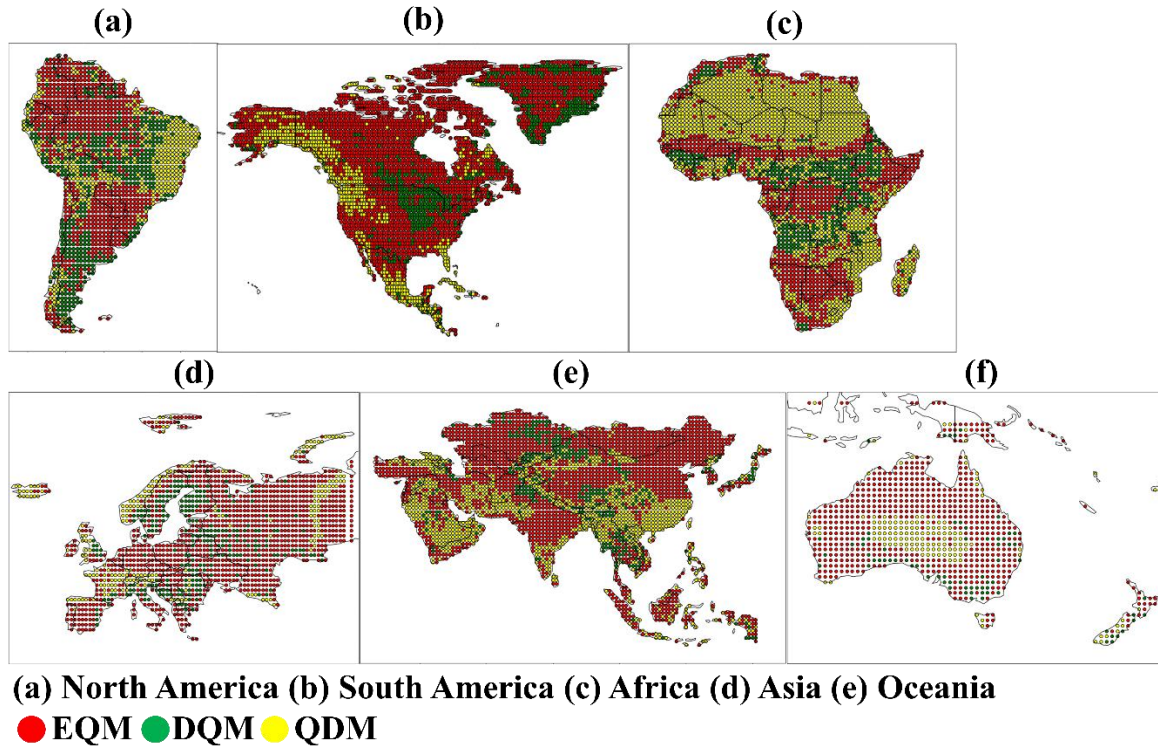

525  
 526 Figure 11 Spatial distribution for selected best bias correction methods across continents  
 527 using TOPSIS

### 529 3.3 Uncertainty quantification of bias corrected daily precipitation

#### 530 3.3.1 Uncertainty by model

531 This study quantifies the daily precipitation uncertainty of 11 CMIP6 GCMs, corrected using  
 532 three different BMA methods. Figure 12 shows the distribution of GCM weight variances  
 533 calculated by BMA across six continents. In South America, the highest weight variance was  
 534 observed mainly in DQM. EQM showed high weight variance in the northern region but lower  
 535 variance than DQM in most other regions. QDM exhibited the lowest weight variance, with  
 536 values less than 0.00113 in most regions. In North America, EQM had the lowest weight  
 537 variance, with values between 0.00055 and 0.00024 in most regions. QDM showed the lowest  
 538 model uncertainty across North America, with more regions where weight variances were  
 539 closer to 0 than the other methods. On the other hand, DQM exhibited high weight variance  
 540 overall, with exceptionally high model uncertainty in the northeast and southern regions. In

541 Africa, EQM's weight variance was estimated to be low overall, resulting in low model  
542 uncertainty in most regions. For QDM, weight variance was low in some regions but higher  
543 than 0.00113 in others. DQM showed high weight variance in most regions except for the  
544 northern area, indicating high model uncertainty across the continent. EQM's weight variance  
545 was the lowest in Europe compared to the other methods, with weight variances close to 0  
546 across the continent. QDM also showed low weight variance overall, though higher than EQM.  
547 DQM exhibited high weight variance in most regions except for Central Europe. In Asia, EQM  
548 showed low weight variance in most regions except Southeast Asia. QDM's weight variance  
549 was similar to EQM's, though some regions had higher model uncertainty. DQM showed high  
550 weight variance in most regions except for some Southwest and North Asian areas. For Oceania,  
551 the weight variances of EQM and DQM were mainly similar, but DQM showed a higher weight  
552 variance overall.



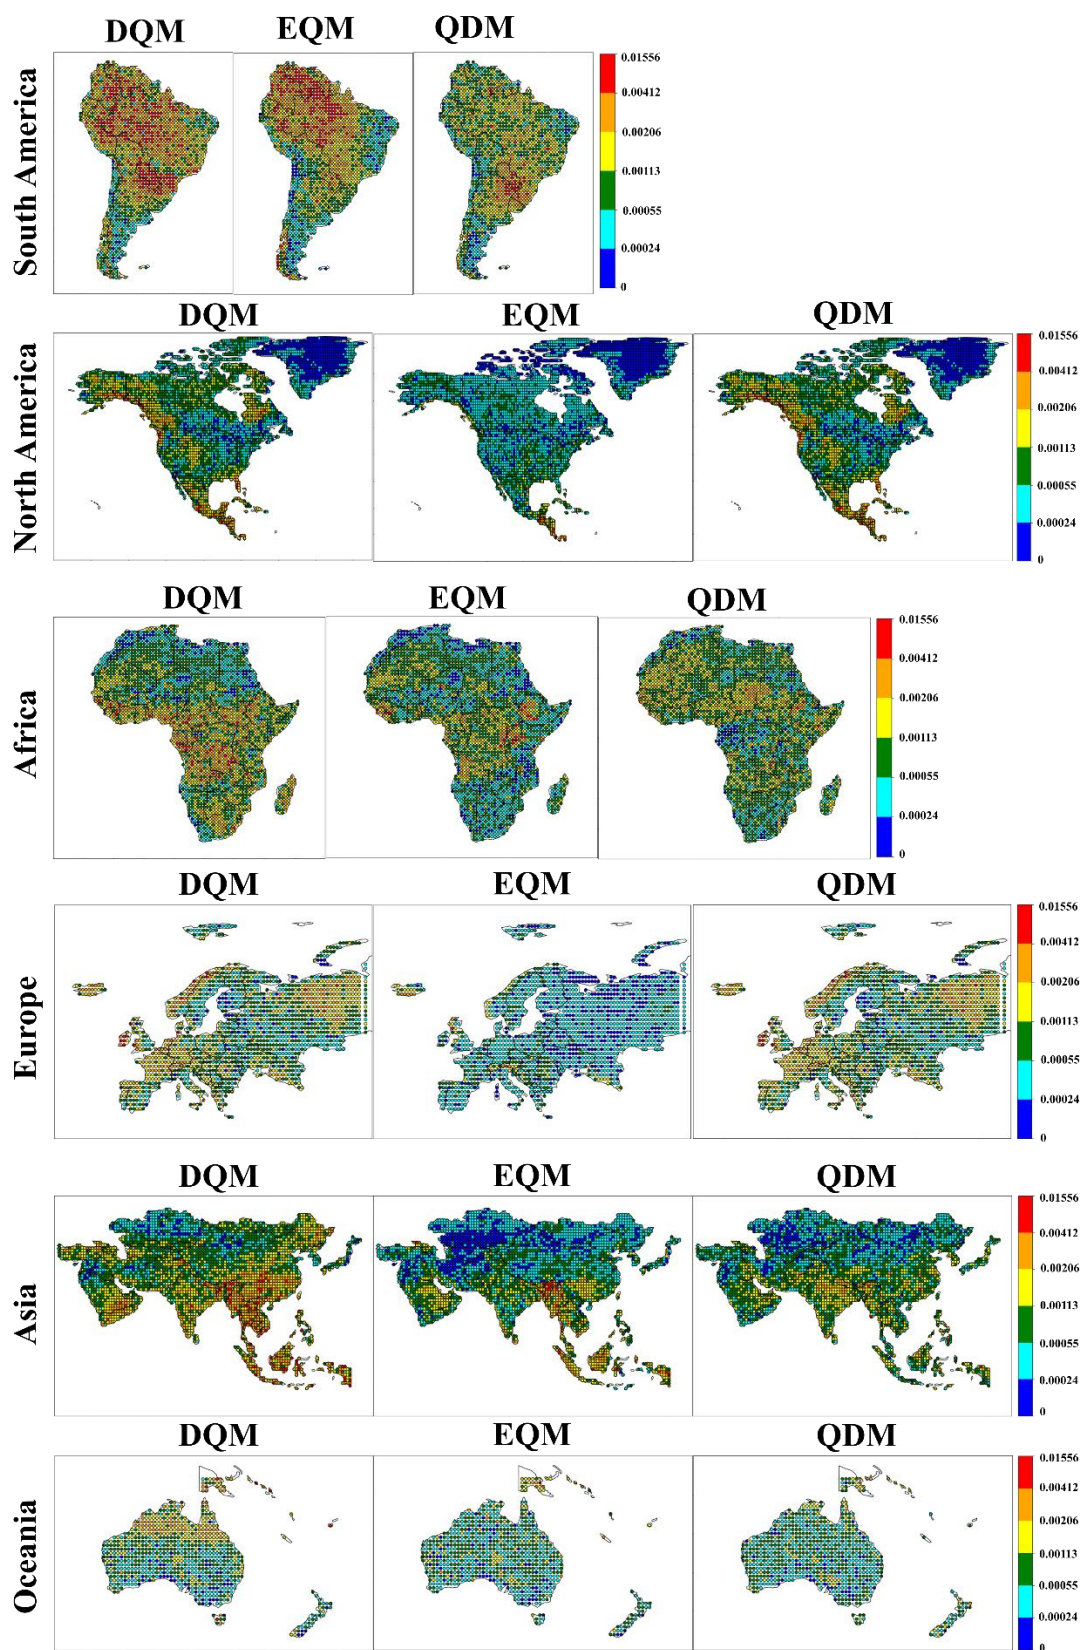

553

554 Figure 12. Spatial distribution of weight variance across continents for bias corrected CMIP6

555 GCMs using BMA



556 Figure 13 shows the distribution of GCM weight variances calculated using BMA across six  
 557 continents, presented as boxplots. Overall, EQM has the smallest weight variance, and QDM  
 558 has the second smallest weight variance on all continents except South America. In contrast,  
 559 in South America, QDM has the smallest weight variance, and EQM has the second smallest.  
 560 DQM consistently has the largest weight variance across all continents, indicating the highest  
 561 model uncertainty.  
 562

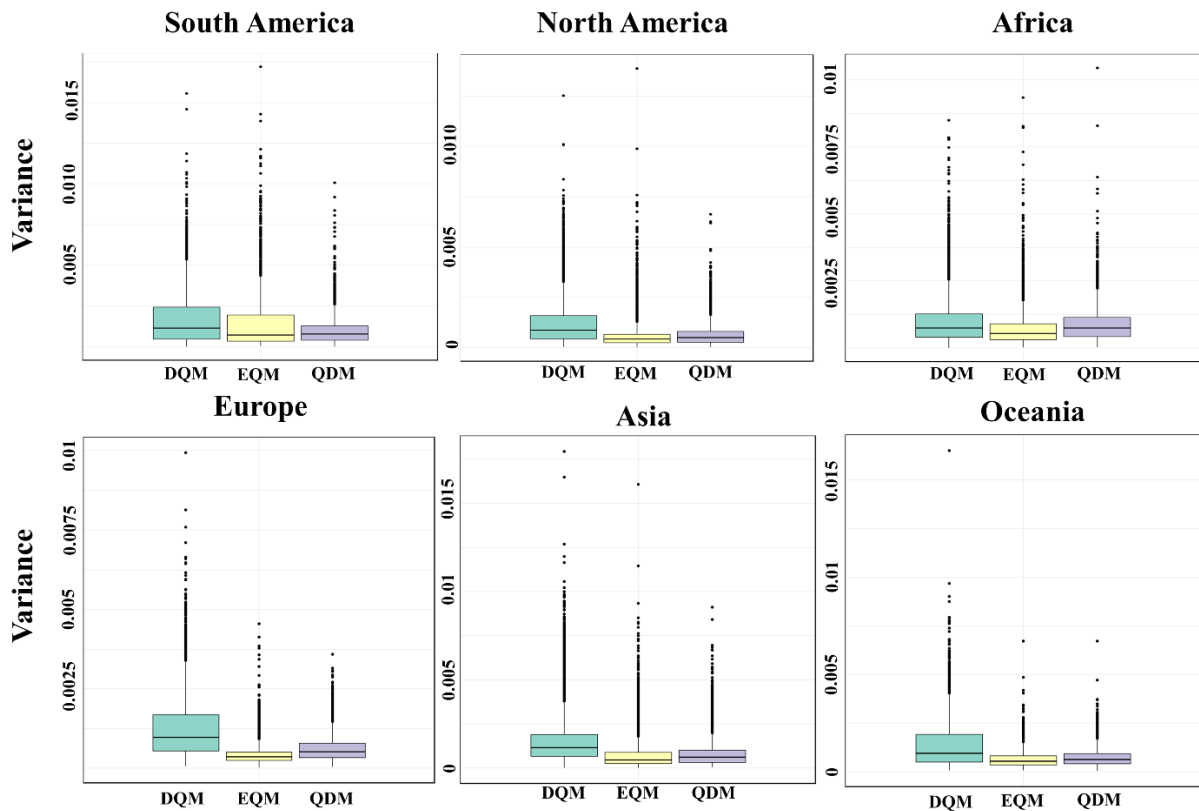

563  
 564 Figure 13. Weight variance for bias correction methods across six continents using box plots.  
 565

### 566 3.3.2 Uncertainty by ensemble prediction

567 A daily precipitation ensemble for the historical period was generated using BMA on 11  
 568 CMIP6 GCMs, and the standard deviation of daily precipitation by continent is presented as  
 569 shown in Figure 14. Overall, the ensemble predicted using EQM provided stable precipitation  
 570 projection with low standard deviations across most continents. The QDM ensemble showed  
 571 similar results to EQM for most continents except Oceania, but the standard deviations were  
 572 slightly higher. On the other hand, the ensemble using DQM exhibited higher standard  
 573 deviations than the other methods for all continents and had the largest prediction uncertainty.

574 In Oceania, the ensembles predicted by the three methods showed similar results. However,  
575 the prediction uncertainty was estimated to be lower in the order of EQM, DQM, and QDM  
576 due to slight differences.

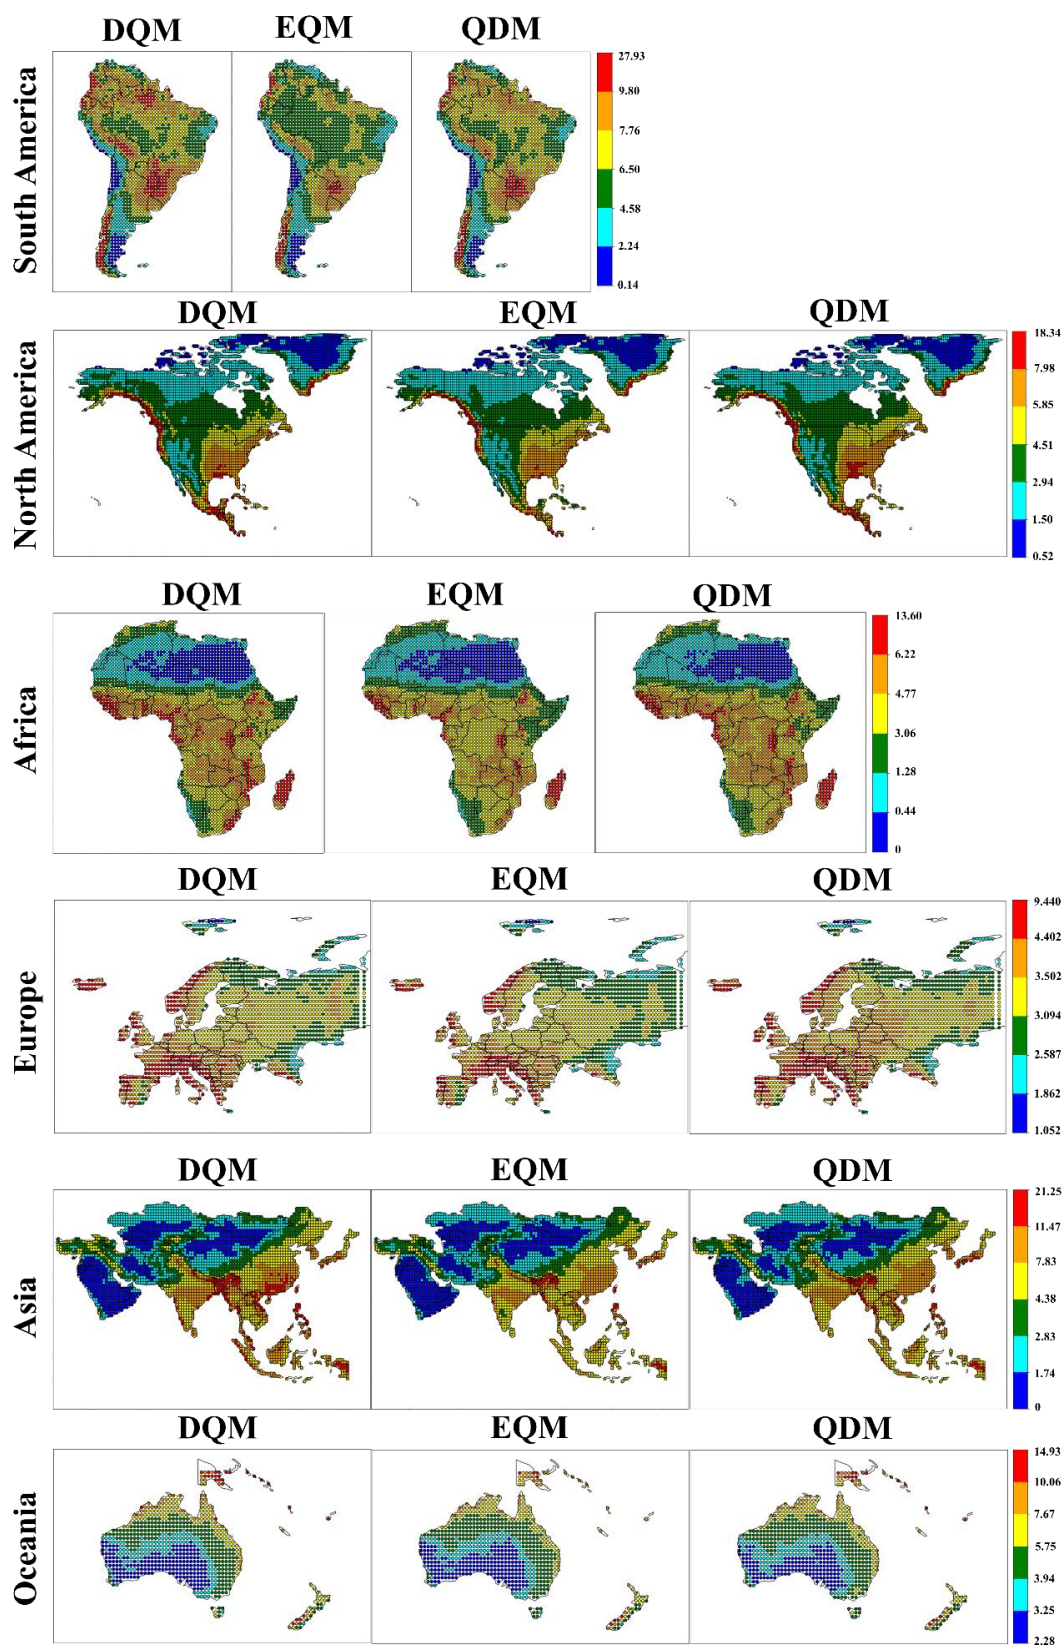

577

578 Figure 14. Spatial distribution of standard deviation for daily precipitation across continents

579 for bias corrected CMIP6 GCMs using BMA

580  
581  
582  
583  
584  
585  
586  
587  
588

Figure 15 shows the standard deviation of daily precipitation for the ensemble forecasted by BMA using three methods, DQM, EQM, and QDM, in a boxplot for each continent. Overall, the EQM ensemble showed the lowest standard deviation across all continents, providing the most stable daily precipitation forecasts. The QDM ensemble showed slightly higher standard deviations than EQM for most continents, but there was no significant difference between the two methods. In contrast, the DQM ensemble showed the highest standard deviation and the largest prediction uncertainty.

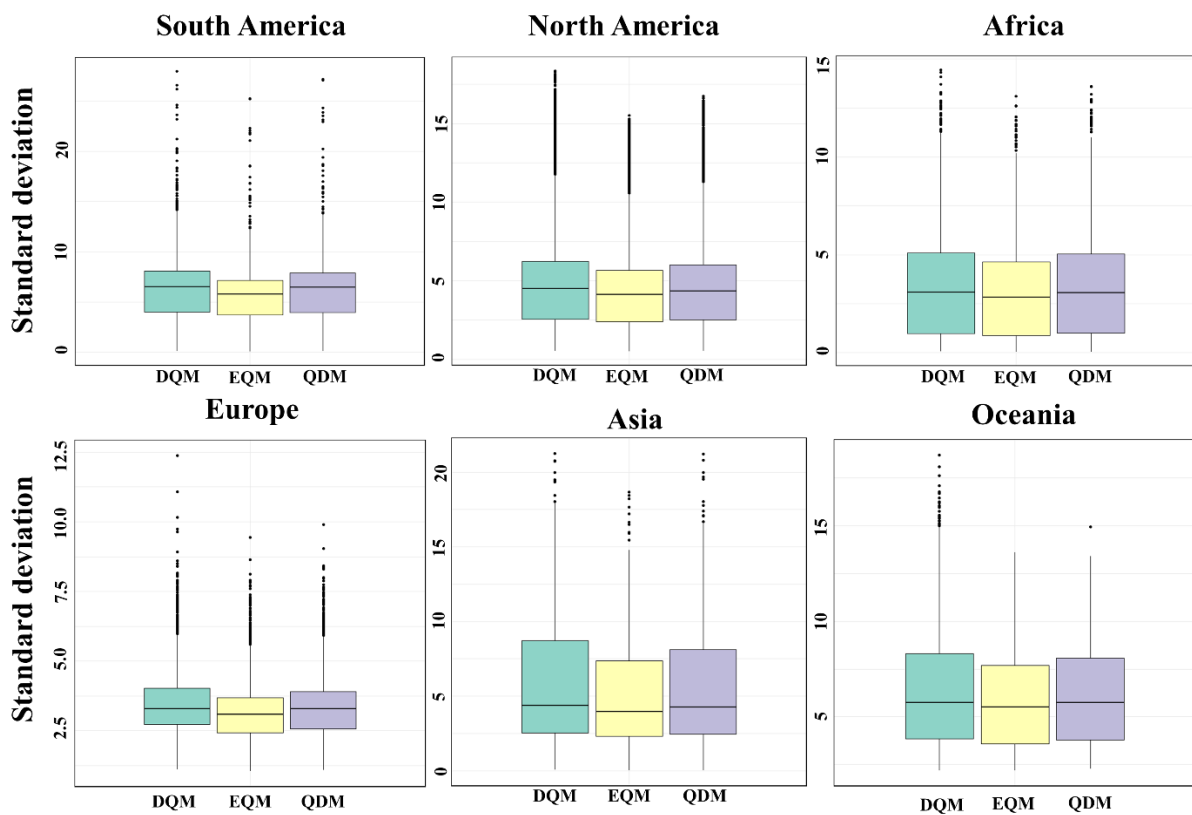

589  
590  
591  
592

Figure 15. Spatial distribution of standard deviation for daily precipitation across continents for bias corrected CMIP6 GCMs using BMA

### 593 3.4 Evaluation of bias correction methods using CI

#### 594 3.4.1 Results of CI by each weighting case

595 This study compared three QM methods by generating a CI based on three cases of weighting  
596 values that considered both model performance and uncertainty. Figures 16, S8, and S9 show

597 the comprehensive indices calculated by applying equal weights and weights emphasizing  
598 performance and uncertainty, respectively.

599 EQM showed the highest CI across all continents when equal weights were applied. However,  
600 the index was lower in southern Europe and southeastern North America, but it calculated high  
601 values in most other regions. QDM showed high index values in some regions, although they  
602 were lower than those of EQM. For example, the CI results were high in the northern and  
603 western parts of North America and the central part of Europe. On the other hand, DQM was  
604 generally unsuitable in most regions but showed a relatively high index in Oceania.

605 When weights that emphasized performance were applied, DQM showed a high index in the  
606 central part of South America but low performance in most continents. Nevertheless, DQM  
607 showed a better index than QDM in some parts of Oceania. EQM showed the best index across  
608 most continents. While QDM was less suitable than EQM, it was still evaluated as a useful  
609 method in some continents.

610 Even when applying weights that increased the emphasis on uncertainty, similar results were  
611 obtained with the other weighting values. In particular, EQM was evaluated as the most suitable  
612 model across all continents, while DQM showed the opposite results.

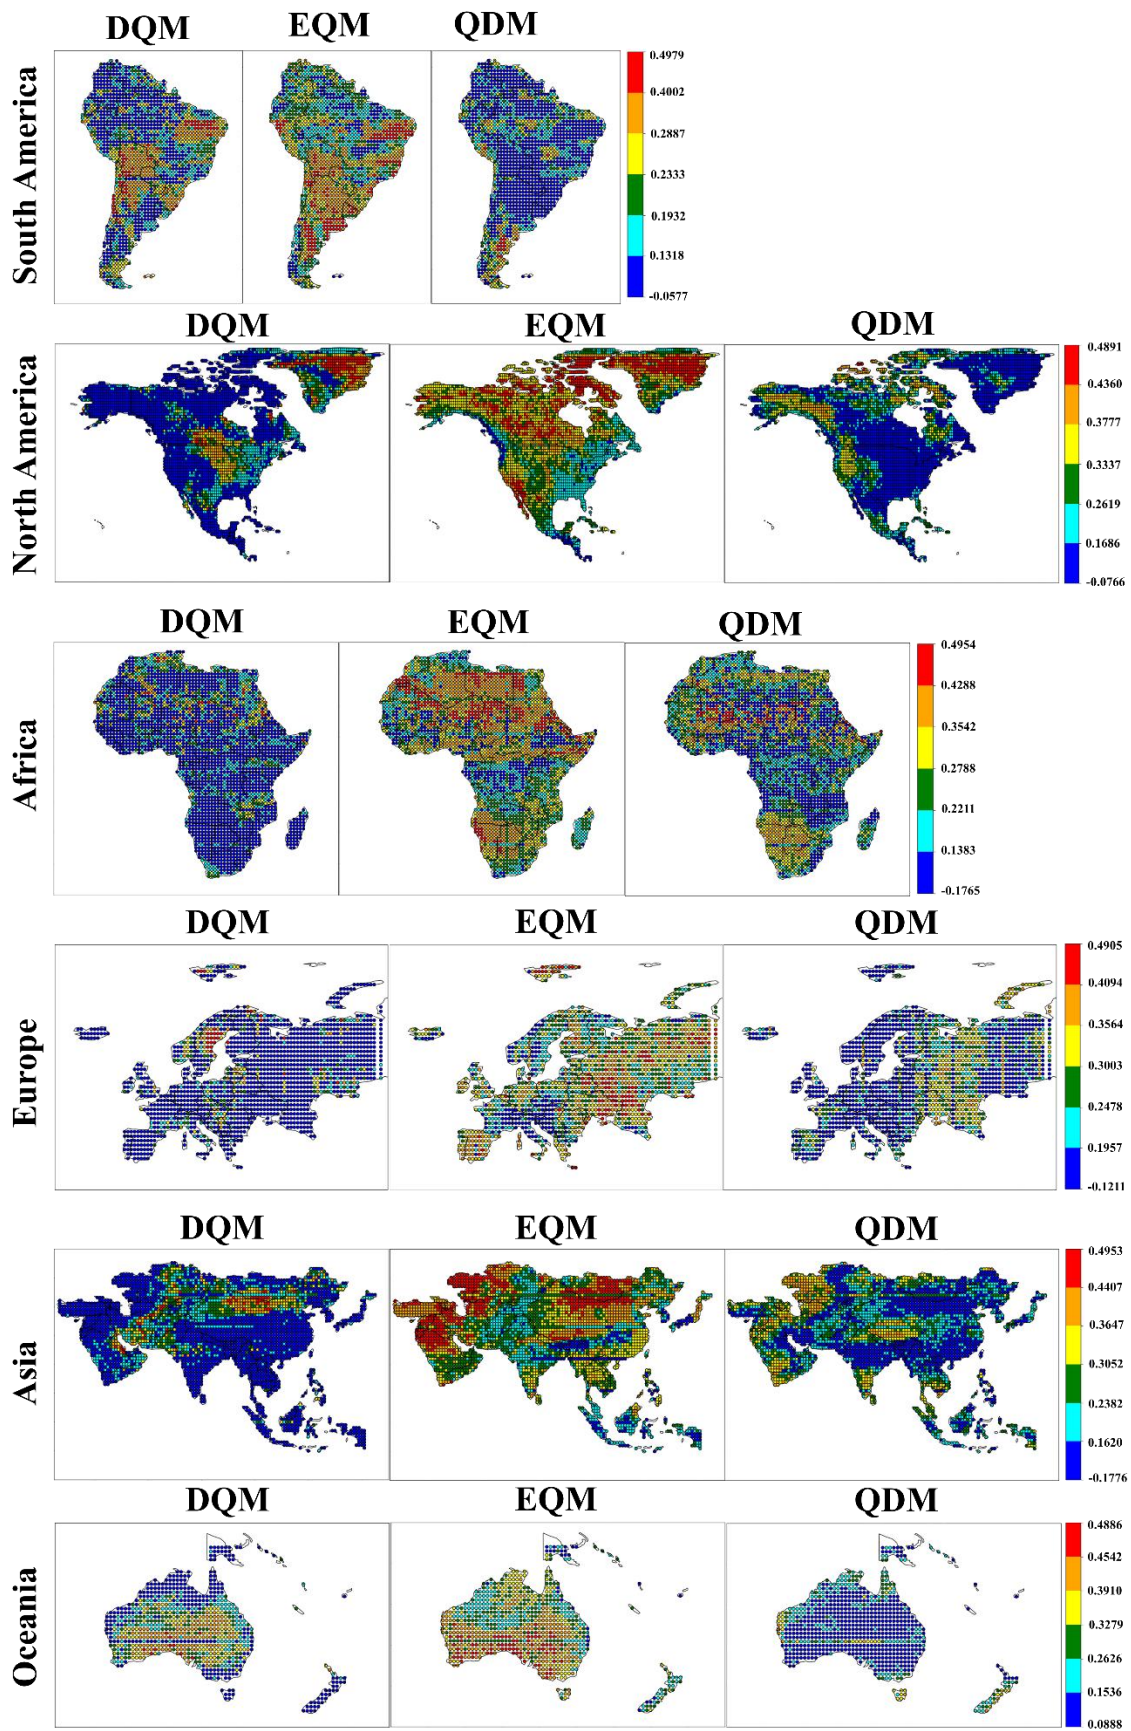



614 Figure 16. Spatial distribution of comprehensive indices for bias correction methods with equal  
 615 weights ( $\alpha: 0.5, \beta: 0.5$ ) across continents

616

617 Figure 17 presents a comparison of the comprehensive indices for three QM methods with  
 618 different weights for each continent using box plots. Overall, all methods showed higher  
 619 indices than the other weighting values in the values that emphasized more weight on  
 620 performance. In all weighted values, DQM showed the lowest indices in all continents except  
 621 for South America and Oceania, where it was slightly higher or similar to QDM. EQM showed  
 622 the best composite indices in all continents, outperforming performance and uncertainty. QDM  
 623 showed high comprehensive indices in most continents, and the gap with EQM narrowed  
 624 significantly in the weighting values that emphasized performance more. Nevertheless, QDM  
 625 overall had lower comprehensive indices than EQM.

626

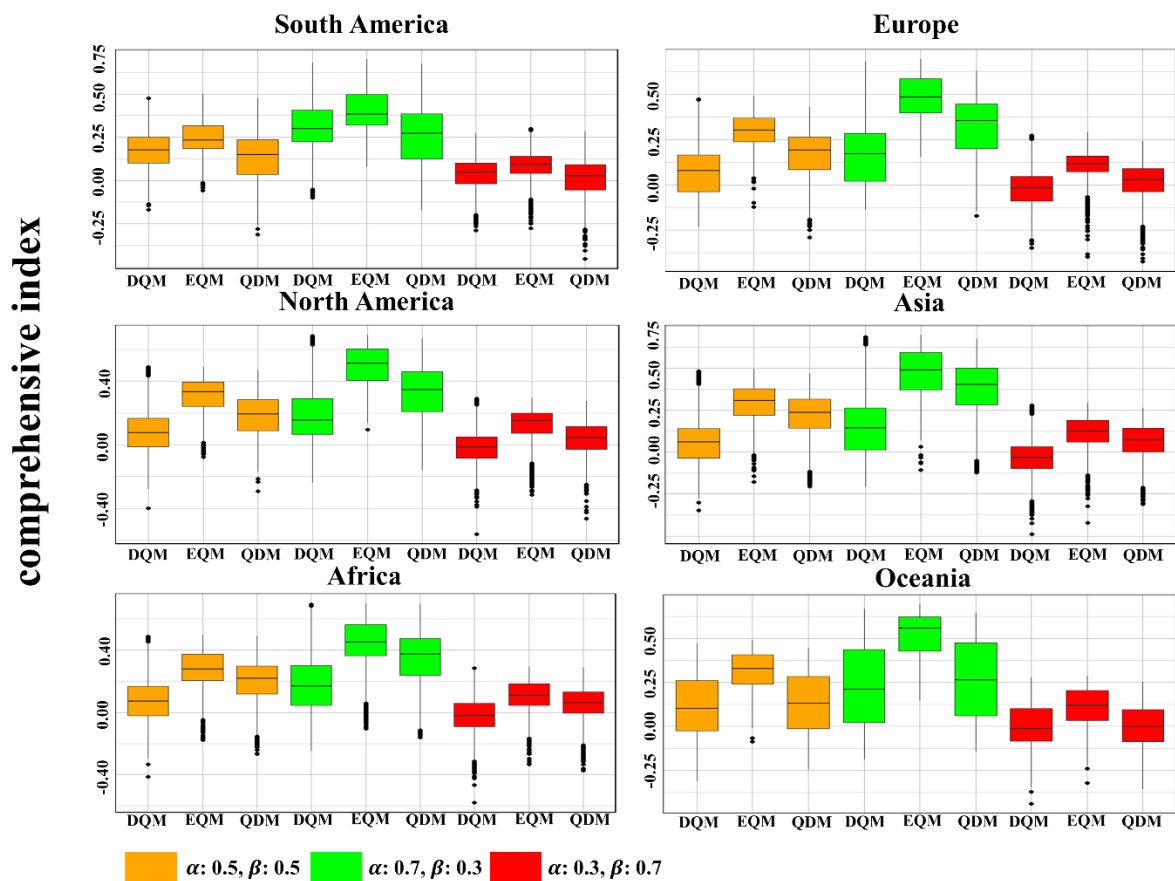

627

628 Figure 17. CI for three bias correction methods across continents with varying weights on  
 629 performance and uncertainty

630

631 **3.4.2 Selection of best bias correction method**

632 Based on the CI, this study selected the best bias correction method for each continent. Figure  
633 18 shows how the best bias correction method was selected for each continent by applying  
634 various weighting values of the CI. Overall, EQM was selected as the best correction method  
635 for most continents in all weighting values and was selected more than other methods in North  
636 America, Europe, Asia, and Oceania. DQM was selected the least in most continents except  
637 for South America and Oceania, and the number of selected grids tended to decrease as the  
638 weighting for uncertainty increased. **QDM was selected as the best bias correction method in**  
639 **western North America, southern and eastern Africa, and northern Europe.** In addition, QDM  
640 was selected the most in Southeast Asia in all weighting values.



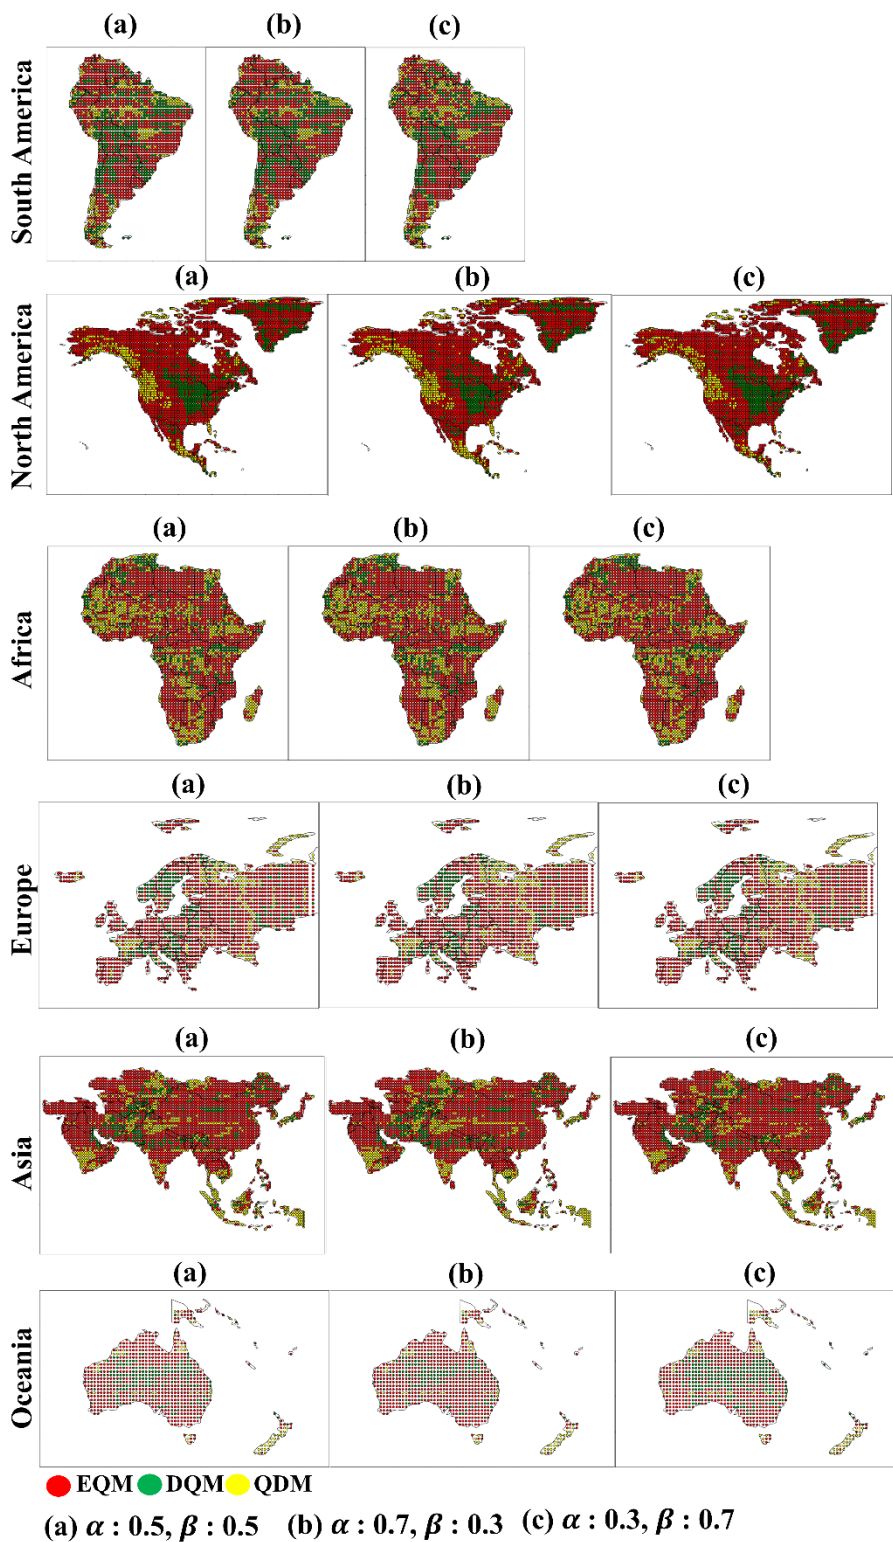

641

642 Figure 18. Selection of best bias correction methods across continents based on CI depending

643 on weighting values.

644

645 Figure 19 shows the number of selected grids for the best bias correction method across  
 646 continents based on three weighting values. Overall, EQM was the most frequently selected  
 647 method across all weighting values, demonstrating superior performance across all continents  
 648 compared to the other methods. Interestingly, as the weight for uncertainty increased, the  
 649 number of grids where EQM was selected also increased, while the number decreased as the  
 650 weight for performance increased. In contrast, QDM was chosen as the second-best method on  
 651 most continents, except for South America and Oceania. The number of selected grids for  
 652 QDM slightly increased as the performance weight increased. DQM was the least selected  
 653 method across most continents, indicating that it was the least suitable overall.  
 654

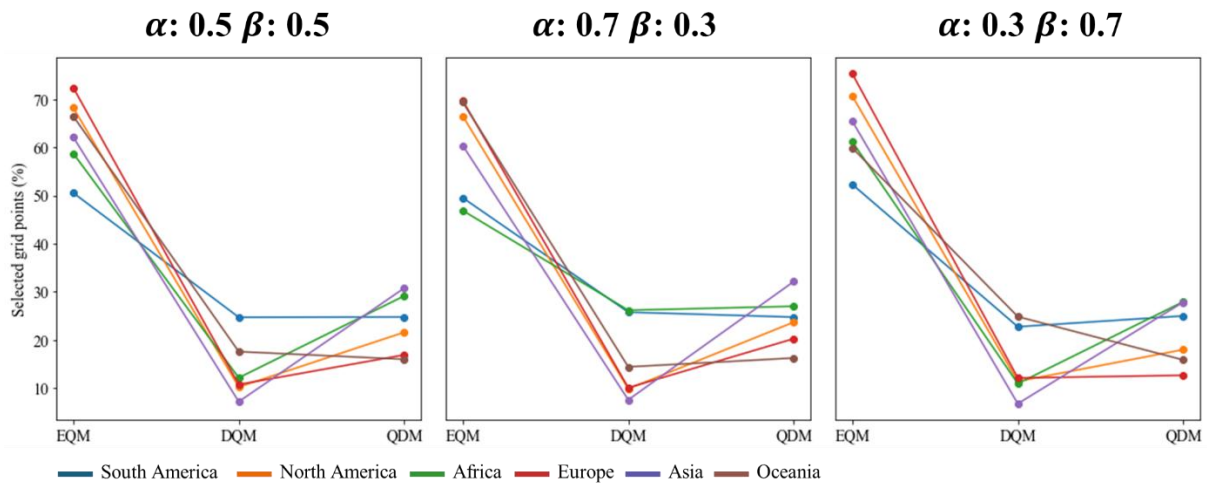

655  
 656 Figure 19. Ratios of selected grids for best bias correction methods across continents based on  
 657 different weighting values  
 658

#### 659 4. Discussion

660 Bias correction methods are widely used in correcting GCM outputs, and previous studies have  
 661 compared the performance of various methods (Homsí et al., 2019; Saranya and Vinish, 2021).  
 662 Among these, Quantile Mapping (QM) has consistently shown superior performance compared  
 663 to other methods, making it a widely used approach for bias correction. In particular, QDM,  
 664 EQM, and DQM, which are the focus of this study, are frequently employed in research  
 665 exploring and applying climate change projections based on GCM outputs (Cannon et al., 2015;  
 666 Switanek et al., 2016; Song et al., 2022a). Analyzing the strengths and limitations of these three  
 667 methods will provide valuable insights for climate researchers, enabling them to choose the  
 668 most suitable bias correction method for specific regions. In this context, this study further

669 evaluates the performance of QDM, EQM, and DQM, especially for daily precipitation, and  
670 investigates how these methods perform across different regions. Unlike previous studies that  
671 focused on the performance of bias correction methods (Song et al., 2024a; Teutschbein and  
672 Seibert, 2012; Smitha et al., 2018), this study suggests a CI that integrates the performance and  
673 uncertainty metrics. This approach enhances the robustness of bias correction method selection  
674 and provides a more holistic evaluation framework. This section discusses the strengths and  
675 weaknesses of each method from various perspectives to provide a more balanced assessment.  
676

#### 677 **4.1 Evaluation of bias correction methods performance**

678 The daily precipitation corrected by the three QM methods outperformed the raw GCM data  
679 (see Figure 1). **All three methods, as evidenced by the Taylor diagram, demonstrated overall  
680 stronger performance than the raw GCM and consistently produced good results across various  
681 regions. Nonetheless, the performance of the bias-corrected GCMs clearly differs. This  
682 highlights the need to use multiple performance metrics to fully understand the strengths and  
683 weaknesses of the three QM methods, as relying on a single analysis or macroscopic  
684 perspective can overlook important details.** From this perspective, many studies have  
685 emphasized the application of a multifaceted analysis in selecting bias correction methods  
686 (Homsí et al., 2019; Cannon et al., 2015; Berg et al., 2022; Song et al., 2023). The spatial  
687 distribution of correction performance, as discussed in Section 3.1.2, varies significantly by  
688 continent. Figures 2 to 7 reveal that the evaluated metrics differ across continents, underscoring  
689 the importance of region-specific correction methods. This finding aligns with Song et al.  
690 (2023), highlighting the importance of selecting appropriate correction methods based on the  
691 precipitation distribution at observation sites. Moreover, studies such as Homsí et al. (2019)  
692 and Saranya and Vinish (2021) also emphasize the variability in bias correction performance  
693 depending on the regional climate and data characteristics, reinforcing the need for tailored  
694 approaches. Of course, the three QM methods showed high performance across most continents,  
695 effectively correcting the biases in daily precipitation from GCMs. However, the corrected  
696 daily precipitation varies subtly among the three methods, with these differences becoming  
697 more pronounced in extreme events or specific evaluation metrics. For example, the three QM  
698 methods tend to perform less effectively in regions with high precipitation, but their  
699 performance also varies by grid (e.g., southern India in Asia: RMSE; central Oceania: Pbias  
700 and EVS; central Europe: Pbias, MdAE, and KGE). While EQM performs well across most

701 continents, DQM and QDM show superior results in specific regions. Similar results were  
702 made by Cannon et al. (2015), which highlighted differences in the performance of bias  
703 correction methods, particularly in handling extreme precipitation events. QDM's error-related  
704 metrics (South America: RMSE, MAE, and MSLE) are nearly identical to EQM's, yet QDM  
705 outperforms EQM regarding MDAE on more grids. These findings suggest that a more nuanced  
706 and detailed analysis of precipitation corrected by GCMs is necessary, aligning with the  
707 conclusions of Gudmundsson et al. (2012), which emphasize that the effectiveness of bias  
708 correction methods can vary significantly depending on local climate characteristics,  
709 highlighting the importance of selecting appropriate methods for each region. These results  
710 suggest a more detailed precipitation analysis from corrected GCMs is needed.

711 This study compared the three QM methods for daily precipitation events above the 95th  
712 percentile (extreme precipitation) using the GEV distribution, as shown in Figure 10. The  
713 results indicate that DQM tends to correct more extreme precipitation events than QDM,  
714 aligning with previous findings that DQM captures a broader range of extremes. The unique  
715 characteristics of DQM caused these results. DQM overestimated the corrected extreme  
716 precipitation due to the relative variability in the data introduced through detrending, and the  
717 subsequent reintroduction of the long-term mean during the correction step widened the range  
718 of extreme precipitation, leading to overestimation compared to the reference data in areas with  
719 high variability. At the same time, QDM and EQM take a more conservative approach (as noted  
720 in previous studies such as Cannon et al., 2015). These findings suggest that EQM and QDM  
721 may be more suitable in regions vulnerable to floods and extreme weather events that require  
722 a more balanced and cautious approach. However, when comparing the differences in GEV  
723 distributions, there was no significant difference between methods in regions like Oceania and  
724 Europe (see Figure 9). These results imply that EQM can better handle extreme values or  
725 outliers in the data by directly comparing and correcting past and future distributions. In  
726 particular, EQM is consistent with previous studies in that it more accurately corrects observed  
727 distributions in non-stationary and highly variable climate variables, such as precipitation  
728 (Thiemeßl et al., 2012; Maraun, 2013; Gudmundsson et al., 2012). These positive aspects are  
729 mainly due to EQM's ability to align the empirical ECDFs of reference and model data across  
730 all quantiles, allowing it to correct biases with high precision at both central tendencies and  
731 extremes. Although there are significant advantages in observing the results of the correction  
732 method in detail from various perspectives, presenting these results without integrating them

733 into a reasonable framework can increase confusion and uncertainty in climate change research  
734 (Wu et al., 2022). Therefore, it is essential to introduce a structured framework such as MCDA  
735 to provide a single integrated result.

736

#### 737 **4.2 Uncertainties of model and ensemble prediction in bias correction methods**

738 In climate modeling, quantifying uncertainty is essential to assess the reliability of bias-  
739 corrected precipitation data. This study applied BMA to quantify the uncertainty of three QM  
740 methods on a continental basis, addressing both model-specific and ensemble prediction  
741 uncertainties. Similar to the findings by Cannon et al. (2015), this analysis demonstrates how  
742 different bias correction methods yield varying uncertainty levels based on the underlying  
743 climate models. Notably, EQM showed the lowest weight variance across most continents,  
744 which means that the inter-model uncertainty for 11 GCMs corrected by EQM is lower than  
745 that of the other QM methods. The low uncertainty associated with EQM aligns with previous  
746 studies like Themeßl et al. (2012), which found that EQM consistently reduced discrepancies  
747 between modeled and observed data across regions. EQM's ability to manage extreme  
748 precipitation and anomalous values based on observed distributions contributes to its reliability,  
749 a feature also emphasized by Gudmundsson et al. (2012). On the other hand, DQM showed the  
750 highest weight variance across all continents, indicating more significant uncertainty when  
751 applied to various GCMs. This uncertainty was particularly pronounced in regions with  
752 complex climate conditions, such as Southeast Asia, East Africa, and the Alps in Europe. These  
753 results align with Berg et al. (2022), who highlighted DQM's limitations in capturing long-term  
754 climate trends and extreme events. The higher uncertainty associated with DQM suggests that,  
755 while its detrending process is effective in correcting the mean, it may struggle in regions  
756 dominated by nonlinear climate patterns, as it does not sufficiently account for all quantiles in  
757 the distribution, particularly extremes, as noted by Cannon et al. (2015). QDM, though showing  
758 lower weight variance than DQM, still demonstrated higher uncertainty than EQM in regions  
759 with diverse climate characteristics. These results are consistent with the study of Tong et al.  
760 (2021), suggesting that QDM performs better under moderate precipitation scenarios. However,  
761 the uncertainty may increase under highly variable or extreme weather conditions. Furthermore,  
762 this study extended the uncertainty analysis to ensemble predictions, calculating the standard  
763 deviation of daily precipitation for each continent using BMA. The EQM-based ensemble  
764 consistently exhibited low standard deviations across all continents, indicating that EQM offers

765 the most stable and reliable precipitation predictions. This finding echoes the conclusions  
766 drawn by Teng et al. (2015), where EQM provided more accurate and less uncertain projections.  
767 In contrast, DQM presented the most significant prediction uncertainty, reinforcing the need  
768 for caution when applying DQM in studies that require high-confidence data. These results  
769 emphasize the importance of weighing performance and uncertainty when choosing a suitable  
770 bias correction method. EQM's consistent performance in reducing uncertainty across model-  
771 specific and ensemble forecasts highlights its robustness as a preferred choice for climate  
772 research. However, the substantial uncertainty associated with DQM suggests that its use  
773 should be limited to regions where its detrending process can be beneficial. Overall, these  
774 findings stress the critical role of uncertainty quantification in climate change impact  
775 assessments and underscore the need for selecting bias correction methods based on a  
776 comprehensive evaluation of both performance and uncertainty.

777

#### 778 **4.3 Integrated assessment of bias correction methods**

779 This study selected the optimal QM method for each continent based on the CI, which considers  
780 uncertainty and performance. The critical point is that uncertainty is decisive when selecting a  
781 bias correction method. As shown in Figure 19, the optimal correction method varies depending  
782 on the continent, and the selected method also changes depending on the weight. These results  
783 suggest that uncertainty still exists, as Berg et al. (2022) pointed out, and that uncertainty must  
784 be considered when selecting the optimal method. In other words, even if the QM method has  
785 high performance, it is difficult to make a reasonable selection if the uncertainty contained in  
786 the method is significant. Overall, EQM showed the highest CI value in all continents, which  
787 means that it provides the most balanced results in terms of performance and uncertainty. These  
788 results are consistent with previous studies (Lafon et al., 2013; Teutschbein and Seibert, 2012;  
789 Teng et al., 2015) that showed high precipitation correction accuracy and excellent  
790 performance, especially under complex climate conditions. QDM was evaluated highly in some  
791 regions but performed worse than EQM overall. Berg et al. (2022) also pointed out that QDM  
792 is superior in general climate conditions but may perform worse in extreme climate situations,  
793 suggesting that this may increase the uncertainty of QDM in extreme climates. DQM was  
794 evaluated as an unsuitable method in most regions due to low CI values, which is consistent  
795 with the limitations of DQM mentioned in Cannon et al. (2015) and Berg et al. (2022). It was  
796 confirmed that DQM performs relatively well in dry climates but may perform worse in various

797 climate conditions. In addition, some differences were observed with the results based on  
798 TOPSIS. For example, DQM was selected more than QDM in South America, but when the  
799 uncertainty weight was applied, QDM was selected more. Conversely, in Oceania, QDM was  
800 selected more than DQM, but when the uncertainty weight was increased to 0.7, DQM was  
801 selected more. These results are consistent with those of Lafferty and Srivier (2023), showing  
802 that when significant uncertainty exists, uncertainty can be greater despite high bias correction  
803 performance.

804

## 805 **5. Conclusion**

806 This study corrected and compared historical daily precipitation from 11 CMIP6 GCMs using  
807 three QM methods. Eleven statistical metrics were used to evaluate the precipitation  
808 performance corrected by three QM methods, and TOPSIS was applied to select performance-  
809 based priorities. BMA was applied to quantify model-specific and ensemble prediction  
810 uncertainties. Additionally, suitable QM methods were selected and compared using a CI that  
811 integrates TOPSIS performance scores with BMA uncertainty metrics. The conclusions of this  
812 study are as follows:

- 813 1. EQM showed the highest overall index across all continents, indicating that it provides  
814 the most balanced approach in terms of performance and uncertainty.
- 815 2. DQM effectively reproduced the dry climate in North Africa and parts of Central and  
816 Southwest Asia but showed the highest uncertainty across all continents. These results  
817 suggest that DQM may lose some long-term trend information, making it less reliable  
818 in regions prone to extreme weather events.
- 819 3. QDM performed better in certain regions, such as Southeast Asia, and was selected  
820 more often than DQM when uncertainty was given greater weight. QDM may be a  
821 promising alternative in areas where uncertainty plays a significant role.
- 822 4. Selecting an appropriate QM is required for high performance, and significant  
823 uncertainty can complicate rational decision-making. Therefore, a multifaceted  
824 approach considering performance and uncertainty is essential in climate modeling.

825 **In conclusion, EQM has emerged as the preferred method due to its balanced performance, but**  
826 **this study emphasizes the importance of regional assessment and careful consideration of**  
827 **uncertainty when selecting a QM method. Furthermore, EQM is the most balanced method**  
828 **regarding performance and uncertainty and will likely be preferred in future climate modeling**



829 studies. However, there may be more suitable QM methods depending on the region, and a  
830 comprehensive evaluation with various weights is needed. Therefore, when establishing  
831 climate change response strategies or policy decisions, it is essential to take a multifaceted  
832 approach that considers uncertainty together rather than relying on a single indicator or  
833 performance alone. It will enable more reliable predictions and better decision-making. Future  
834 research should integrate greenhouse gas scenarios to improve the accuracy of climate  
835 predictions and provide a more comprehensive understanding of future climate risks.

836

### 837 **Code and data availability**

838 Codes for benchmarking the xclim of python package are available from  
839 <https://doi.org/10.5281/zenodo.10685050> (Bourgault et al., 2024). Furthermore, the CI  
840 proposed in this study, along with the TOPSIS and BMA used within it, is available at  
841 <https://doi.org/10.5281/zenodo.14351816> (Song, 2024b). The data used in this study are  
842 publicly available from multiple sources. CMIP6 General Circulation Models (GCMs) outputs  
843 were obtained from the Earth System Grid Federation (ESGF) data portal at [https://esgf-](https://esgf-node.llnl.gov/search/cmip6/)  
844 [node.llnl.gov/search/cmip6/](https://esgf-node.llnl.gov/search/cmip6/). Users can select data types such as climate variables, time series,  
845 and experiment ID, which can be downloaded as NC files. Furthermore, CMIP6 GCMs output  
846 can also be accessed in Eyring et al. (2016) The ERA5 reanalysis dataset used in this study is  
847 available through the Copernicus Data Store (CDS) provided by ECMWF  
848 ([https://cds.climate.copernicus.eu/cdsapp#!/dataset/reanalysis-era5-single-](https://cds.climate.copernicus.eu/cdsapp#!/dataset/reanalysis-era5-single-levels?tab=overview)  
849 [levels?tab=overview](https://cds.climate.copernicus.eu/cdsapp#!/dataset/reanalysis-era5-single-levels?tab=overview)). ERA5 is available at <https://doi.org/10.24381/cds.bd0915c6> (Hersbach  
850 et al., 2023). The daily precipitation datasets from CMIP6 GCM and ERA5 used in this study  
851 are available at <https://doi.org/10.6084/m9.figshare.27999167.v5> (Song, 2024c).

852

### 853 **Author contributions**

854 Young Hoon Song: Conceptualization, Methodology, Data curation, Funding acquisition,  
855 Visualization, Writing – original draft, Writing – review & editing. Eun Sung Chung: Formal  
856 analysis, Funding acquisition, Methodology, Project administration, Supervision, Validation,  
857 Writing-review & editing

858

### 859 **Declaration of Competing Interests**

860 The authors declare that they have no known competing financial interests or personal  
861 relationships that could have appeared to influence the work reported in this paper.

862

### 863 **Acknowledgement**

864 This study was supported by National Research Foundation of Korea (NRF) (RS-2023-  
865 00246767\_2; 2021R1A2C200569914)

866

### 867 **Reference**

- 868 1. Abdelmoaty, H.M., and Papalexiou, S.M.: Changes of Extreme Precipitation in  
869 CMIP6 Projections: Should We Use Stationary or Nonstationary Models? *J. Clim.*  
870 36(9), 2999-3014, <https://doi.org/10.1175/JCLI-D-22-0467.1>, 2023.
- 871 2. Ansari, R., Casanueva, A., Liaqat, M.U., and Grossi, G.: Evaluation of bias  
872 correction methods for a multivariate drought index: case study of the Upper Jhelum  
873 Basin. *GMD* 16(7), 2055-2076, <https://doi.org/10.5194/gmd-16-2055-2023>, 2023.
- 874 3. Berg P., Bosshard, T., Yang, W., and Zimmermann, K.: MIIdASv0.2.1 – Multi-scale  
875 bias AdjuStment. *GMD* 15, 6165-6180, <https://doi.org/10.5194/gmd-15-6165-2022>,  
876 2022
- 877 4. Bourgault, P., Huard, D., Smith, T.J., Logan, T., Aoun, A., Lavoie, J., Dupuis, É.,  
878 Rondeau-Genesse, G., Alegre, R., Barnes, C., Beaupré Laperrière, A., Biner, S.,  
879 Caron, D., Ehbrecht, C., Fyke, J., Keel, T., Labonté, M.P., Lierhammer, L., Low,  
880 J.F., Quinn, J., Roy, P., Squire, D., Stephens, Ag., Tanguy, M., Whelan, C., Braun,  
881 M., Castro, D.: *xclim: xarray-based climate data analytics (0.48.1)*. Zenodo [Code],  
882 <https://doi.org/10.5281/zenodo.10685050>, 2024.
- 883 5. Cannon, A. J., Sobie, S. R., and Murdock, T.Q.: Bias correction of GCM  
884 precipitation by quantile mapping: How well do methods preserve changes in  
885 quantiles and extremes? *J. Clim.* 28(17), 6938-6959, <https://doi.org/10.1175/JCLI-D-14-00754.1>, 2015.
- 887 6. Cannon, A.J.: Multivariate quantile mapping bias correction: an N-dimensional  
888 probability density function transform for climate model simulations of multiple  
889 variables. *Clim. Dyn.* 50, 31–49. <https://doi.org/10.1007/s00382-017-3580-6>, 2018.
- 890 7. Chae, S. T., Chung, E. S., and Jiang, J.: Robust siting of permeable pavement in  
891 highly urbanized watersheds considering climate change using a combination of

- 892 fuzzy-TOPSIS and the VIKOR method. *Water Resour. Manag.* 36(3), 951–969,  
893 <https://doi.org/10.1007/s11269-022-03062-y>, 2022.
- 894 8. Chua, Z.W., Kuleshov, Y., Watkins, A.B., Choy, S., and Sun, C.: A Comparison of  
895 Various Correction and Blending Techniques for Creating an Improved Satellite-  
896 Gauge Rainfall Dataset over Australia. *Remote Sens.* 14(2), 261,  
897 <https://doi.org/10.3390/rs14020261>, 2022.
- 898 9. Chung, E. S., and Kim, Y.J.: Development of fuzzy multi-criteria approach to  
899 prioritize locations of treated wastewater use considering climate change scenarios.  
900 *JEM* 146, 505–516, <https://doi.org/10.1016/j.jenvman.2014.08.013>, 2014.
- 901 10. Cox, P., and Stephenson, D.: A changing climate for prediction. *Science* 317(5835),  
902 207–208, <https://www.science.org/doi/10.1126/science.1145956>, 2007.
- 903 11. Deser, C., Phillips, A., Bourdette, V., and Teng, H.: Uncertainty in climate change  
904 projections: the role of internal variability. *Clim. Dyn.* 38, 527–546,  
905 <https://doi.org/10.1007/s00382-010-0977-x>, 2012
- 906 12. Déqué, M.: Frequency of precipitation and temperature extremes over France in an  
907 anthropogenic scenario: Model results and statistical correction according to  
908 observed values. *Glob. Planet. Change.* 57(1-2), 16-26,  
909 <https://doi.org/10.1016/j.gloplacha.2006.11.030>, 2007.
- 910 13. Ehret, U., Zehe, E., Wulfmeyer, V., Warrach-Sagi, K., and Liebert, J.: HESS  
911 Opinions "Should we apply bias correction to global and regional climate model  
912 data?". *HESS* 16(9), 3391-3404, <https://doi.org/10.5194/hess-16-3391-2012>, 2012.
- 913 14. Enayati, M., Bozorg-Haddad, O., Bazrafshan, J., Hejabi, S., and Chu, X.: Bias  
914 correction capabilities of quantile mapping methods for rainfall and temperature  
915 variables. *Water and Climate change* 12(2), 401-419,  
916 <https://doi.org/10.2166/wcc.2020.261>, 2021.
- 917 15. Evin, G., Ribes, A., and Corre, L.: Assessing CMIP6 uncertainties at global warming  
918 levels. *Clim Dyn.* <https://doi.org/10.1007/s00382-024-07323-x>, 2024.
- 919 16. Eyring, V., Bony, S., Meehl, G., Senior, C., Stevens, B., Stouffer, R., and Taylor, K.:  
920 **Overview of the Coupled Model Intercomparison Project Phase 6 (CMIP6)**  
921 **experimental design and organization. *Geoscientific Model Development*, 9(5),**  
922 **1937–1958. 2016. <https://doi.org/10.5194/gmd-9-1937-2016>**
- 923 17. Galton, F.: Regression Towards Mediocrity in Hereditary Stature. *The Journal of the*

- 924 Anthropological Institute of Great Britain and Ireland 15, 246-263,  
925 <https://doi.org/10.2307/2841583>, 1886.
- 926 18. Giorgi, F., and Mearns, L.O.: Calculation of average, uncertainty range, and  
927 reliability of regional climate changes from AOGCM simulations via the “reliability  
928 ensemble averaging” (REA) method, *J. Clim.* 15, 1141–1158,  
929 [https://doi.org/10.1175/1520-0442\(2002\)015<1141:COAURA>2.0.CO;2](https://doi.org/10.1175/1520-0442(2002)015<1141:COAURA>2.0.CO;2), 2000.
- 930 19. Gupta, H.V., Kling, H., Yilmaz, K.K., and Martinez, G.F.: Decomposition of the  
931 mean squared error and NSE performance criteria: Implications for improving  
932 hydrological modelling. *J. Hydrol.* 377(1–2), 80–91,  
933 <https://doi.org/10.1016/j.jhydrol.2009.08.003>, 2009
- 934 20. Gudmundsson, L., Bremnes, J.B., Haugen, J.E., and Engen-Skaugen, T.: Technical  
935 Note: Downscaling RCM precipitation to the station scale using statistical  
936 transformations – a comparison of methods. *HESS* 16(9), 3383–3390,  
937 <https://doi.org/10.5194/hess-16-3383-2012>, 2012.
- 938 21. Hamed, M.M., Nashwan, M.S., Shahid, S., Wang, X.J., Ismail, T.B., Dewan, A., and  
939 Asaduzzaman, M.d: Future Köppen-Geiger climate zones over Southeast Asia using  
940 CMIP6 Multimodel Ensemble. *Atmos. Res.* 283(1), 106560,  
941 <https://doi.org/10.1016/j.atmosres.2022.106560>, 2023.
- 942 22. Hersbach, H., Bell, B., Berrisford, P., Hirahara, S., Horányi, A., Muñoz-Sabater, J.,  
943 Nicolas, J., Peubey, C., Radu, R., Schepers, D., Simmons, A., Soci, C., Abdalla, S.,  
944 Abellan, X., Balsamo, G., Bechtold, P., Biavati, G., Bidlot, J., Bonavita, M., Chiara,  
945 G., Dahlgren, P., Dee, D., Diamantakis, M., Dragani, R., Flemming, J., Forbes, R.,  
946 Fuentes, M., Geer, A., Haimberger, L., Healy, S., Hogan, R. J., Hólm, E., Janisková,  
947 M., Keeley, S., Laloyaux, P., Lopez, P., Lupu, C., Radnoti, G., Rosnay, P., Rozum,  
948 I., Vamborg, F., Villaume, S., and Thépaut, J.: The ERA5 global reanalysis, *Q. J.*  
949 *Roy. Meteor. Soc.*, 146, 1999–2049, <https://doi.org/10.1002/qj.3803>, 2020.
- 950 23. Hersbach, H., Bell, B., Berrisford, P., Biavati, G., Horányi, A., Muñoz Sabater, J.,  
951 Nicolas, J., Peubey, C., Radu, R., Rozum, I., Schepers, D., Simmons, A., Soci, C.,  
952 Dee, D., and Thépaut, J.-N.: ERA5 hourly data on pressure levels from 1940 to  
953 present, Copernicus Climate Change Service (C3S) Climate Data Store (CDS),  
954 <https://doi.org/10.24381/cds.bd0915c6>, 2023.
- 955 24. Homsí, R., Shiru, M. S., Shahid, S., Ismail, T., Harun, S. B., Al-Ansari, N., and

- 956 Yaseen, Z.M: Precipitation projection using a CMIP5 GCM ensemble model: a  
957 regional investigation of Syria. *Eng. Appl. Comput. Fluid Mech.* 14(1), 90–106,  
958 <https://doi.org/10.1080/19942060.2019.1683076>, 2019.
- 959 25. Hoeting J.A., Madigan D., Raftery A.E., and Volinsky C.T.: Bayesian model  
960 averaging: A tutorial (with discussion). *Stat. Sci.* 214, 382-417,  
961 <https://doi.org/10.1214/ss/1009212519>, 1999.
- 962 26. Hosking, J.R.M., Wallis, J.R., and Wood, E.F.: Estimation of the generalized  
963 extreme value distribution by the method of probability weighted moments.  
964 *Technometrics* 27, 251–261, <https://doi.org/10.1080/00401706.1985.10488049>,  
965 1985.
- 966 27. Hosking, J.R.M.: L-moments: Analysis and estimation of distributions using linear  
967 combinations of order statistics. *J. R. Stat.* 52, 105–124,  
968 <https://doi.org/10.1111/j.2517-6161.1990.tb01775.x>, 1990.
- 969 28. Hwang, C. L., and Yoon, K.: Multiple attribute decision making: Methods and  
970 applications. Springer-Verlag. <https://doi.org/10.1007/978-3-642-48318-9>. 1981.
- 971 29. IPCC: Climate Change 2021: The Physical Science Basis. Contribution of Working  
972 Group I to the Sixth Assessment Report of the Intergovernmental Panel on Climate  
973 Change, edited by: Masson-Delmotte, V., Zhai, P., Pirani, A., Connors, S. L., Péan,  
974 C., Berger, S., Caud, N., Chen, Y., Goldfarb, L., Gomis, M. I., Huang, M., Leitzell,  
975 K., Lonnoy, E., Matthews, J. B. R., Maycock, T. K., Waterfield, T., Yelekçi, O., Yu,  
976 R., and Zhou, B., Cambridge University Press,  
977 <https://doi.org/10.1017/9781009157896>, 2021.
- 978 30. IPCC: Climate Change 2022: Impacts, Adaptation, and Vulnerability. Contribution  
979 of Working Group II to the Sixth Assessment Report of the Intergovernmental Panel  
980 on Climate Change, edited by: Pörtner, H.-O., Roberts, D. C., Tignor, M.,  
981 Poloczanska, E. S., Mintenbeck, K., Alegría, A., Craig, M., Langsdorf, S., Löschke,  
982 S., Möller, V., Okem, A., and Rama, B., Cambridge University Press,  
983 <https://doi.org/10.1017/9781009325844>, 2022.
- 984 31. Ishizaki, N.N., Shiogama, H., Hanasaki, N., Takahashi, K., and Nakaegawa, T.:  
985 Evaluation of the spatial characteristics of climate scenarios based on statistical and  
986 dynamical downscaling for impact assessments in Japan. *Int. J. Climatol.* 43(2),  
987 1179-1192, <https://doi.org/10.1002/joc.7903>, 2022.

- 988 32. Jobst, A.M., Kingston, D.G., Cullen, N.J., and Schmid, J.: Intercomparison of  
989 different uncertainty sources in hydrological climate change projections for an alpine  
990 catchment (upper Clutha River, New Zealand). *HESS* 22, 3125-3142,  
991 <https://doi.org/10.5194/hess-22-3125-2018>, 2018.
- 992 33. Lafferty, D.C., and Sriver, R.L.: Downscaling and bias-correction contribute  
993 considerable uncertainty to local climate projections in CMIP6. *npj Clim Atmos*  
994 *Sci* 6, 158, <https://doi.org/10.1038/s41612-023-00486-0>, 2023.
- 995 34. Lafon, T., Dadson, S., Buys, G., and Prudhomme, C.: Bias correction of daily  
996 precipitation simulated by a regional climate model: a comparison of methods. *Int. J.*  
997 *Climatol.* 33, 1367-1381, <http://dx.doi.org/10.1002/joc.3518>, 2013.
- 998 35. Lin, J.: Divergence measures based on the Shannon entropy. *IEEE Transactions on*  
999 *Information Theory* 37(1), 145–151, <https://doi.org/10.1109/18.61115>, 1991.
- 1000 36. Maraun, D.: Bias correction, quantile mapping, and downscaling: Revisiting the  
1001 inflation issue. *J. Clim.* 26(6), 2137-2143, [https://doi.org/10.1175/JCLI-D-12-](https://doi.org/10.1175/JCLI-D-12-00821.1)  
1002 [00821.1](https://doi.org/10.1175/JCLI-D-12-00821.1), 2013.
- 1003 37. Nair, M.M.A., Rajesh, N., Sahai, A.K., and Lakshmi Kumar, T.V.: Quantification of  
1004 uncertainties in projections of extreme daily precipitation simulated by CMIP6  
1005 GCMs over homogeneous regions of India. *Int. J. Climatol.* 43(15), 7365-7380,  
1006 <https://doi.org/10.1002/joc.8269>, 2023.
- 1007 38. Nash, J.E., and Sutcliffe, J.V.: River flow forecasting through conceptual models part  
1008 I—A discussion of principles. *J. Hydrol.* 10, 282–290, [https://doi.org/10.1016/0022-](https://doi.org/10.1016/0022-1694(70)90255-6)  
1009 [1694\(70\)90255-6](https://doi.org/10.1016/0022-1694(70)90255-6)Return to ref 1970 in article, 1970.
- 1010 39. Pathak, R., Dasari, H.P., Ashok, K., and Hoteit, I., Effects of multi-observations  
1011 uncertainty and models similarity on climate change projections. *npj clim. atmos. sci.*  
1012 6, 144, <https://doi.org/10.1038/s41612-023-00473-5>, 2023.
- 1013 40. Petrova, I.Y., Miralles, D.G., Brient, F., Donat, M.G., Min, S.K., Kim, Y.H., and  
1014 Bador, M.: Observation-constrained projections reveal longer-than-expected dry  
1015 spells. *Nature* 633, 594–600, <https://doi.org/10.1038/s41586-024-07887-y>, 2024.
- 1016 41. Piani, C., Weedon, G. P., Best, M., Gomes, S. M., Viterbo, P., Hagemann, S., and  
1017 Haerter, J.O.: Statistical bias correction of global simulated daily precipitation and  
1018 temperature for the application of hydrological models. *J. Hydrol.* 395(3-4), 199-215,  
1019 <https://doi.org/10.1016/j.jhydrol.2010.10.024>, 2010.

- 1020 42. Rahimi, R., Tavakol-Davani, H., and Nasser, M.: An Uncertainty-Based Regional  
1021 Comparative Analysis on the Performance of Different Bias Correction Methods in  
1022 Statistical Downscaling of Precipitation. *Water Resour. Manag.* 35, 2503–2518,  
1023 <https://doi.org/10.1007/s11269-021-02844-0>, 2021.
- 1024 43. Rajulapati, C.R., and Papalexiou, S.M.: Precipitation Bias Correction: A Novel  
1025 Semi-parametric Quantile Mapping Method. *Earth Space Sci.* 10(4),  
1026 e2023EA002823, <https://doi.org/10.1029/2023EA002823>, 2023.
- 1027 44. Roca, R., Alexander, L. V., Potter, G., Bador, M., Jucá, R., Contractor, S.,  
1028 Bosilovich, M. G., and Cloché, S.: FROGS: a daily  $1^\circ \times 1^\circ$  gridded precipitation  
1029 database of rain gauge, satellite and reanalysis products, *Earth Syst. Sci. Data*, 11,  
1030 1017–1035, <https://doi.org/10.5194/essd-11-1017-2019>, 2019.
- 1031 45. Roca, R., and Fiolleau, T.: Extreme precipitation in the tropics is closely associated  
1032 with long-lived convective systems. *Commun Earth Environ* 1(18),  
1033 <https://doi.org/10.1038/s43247-020-00015-4>, 2020.
- 1034 46. Saranya, M.S., and Vinish, V.N.: Evaluation and selection of CORDEX-SA datasets  
1035 and bias correction methods for a hydrological impact study in a humid tropical river  
1036 basin, Kerala. *Water Climate Change* 12(8), 3688-3713,  
1037 <https://doi.org/10.2166/wcc.2021.139>, 2021.
- 1038 47. Shanmugam, M., Lim, S., Hosan, M.L. Shrestha, S., Babel, M.S., and Viridis, S.G.P.:  
1039 Lapse rate-adjusted bias correction for CMIP6 GCM precipitation data: An  
1040 application to the Monsoon Asia Region. *Environ Monit Assess.* 196, 49,  
1041 <https://doi.org/10.1007/s10661-023-12187-5>, 2024.
- 1042 48. Smitha, P.S., Narasimhan, B., Sudheer K.P., and Annamalai, H.: An improved bias  
1043 correction method of daily rainfall data using a sliding window technique for climate  
1044 change impact assessment. *J. Hydrol.* 556, 100-118.  
1045 <https://doi.org/10.1016/j.jhydrol.2017.11.010>, 2018
- 1046 49. Song, J. Y., and Chung, E.S.: Robustness, uncertainty, and sensitivity analyses of  
1047 TOPSIS method to climate change vulnerability: Case of flood damage. *Water*  
1048 *Resour. Manag.*, 30(13), 4751–4771, <https://doi.org/10.1007/s11269-016-1451-2>,  
1049 2016.
- 1050 50. Song, Y.H., Shahid, S., and Chung, E.S.: Differences in multi-model ensembles of  
1051 CMIP5 and CMIP6 projections for future droughts in South Korea. *Int. J. Climatol.*



- 1052 42(5), 2688-2716, <https://doi.org/10.1002/joc.7386>, 2022a.
- 1053 51. Song, Y.H., Chung, E.S., and Shahid, S.: The New Bias Correction Method for Daily  
1054 Extremes Precipitation over South Korea using CMIP6 GCMs. *Water Resour.*  
1055 *Manag.* 36, 5977–5997, <https://doi.org/10.1007/s11269-022-03338-3>, 2022b.
- 1056 52. Song, Y.H., Chung, E.S., and Shahid, S.: Uncertainties in evapotranspiration  
1057 projections associated with estimation methods and CMIP6 GCMs for South Korea.  
1058 *Sci. Total Environ.* 825, 153953, <https://doi.org/10.1016/j.scitotenv.2022.153953>,  
1059 2023.
- 1060 53. Song, Y.H., Chung, E.S., and Shahid, S.: Global Future Climate Signal by Latitudes  
1061 Using CMIP6 GCMs. *Earths Future* 12(3), e2022EF003183,  
1062 <https://doi.org/10.1029/2022EF003183>, 2024a.
- 1063 54. Song, Y.H.: *Comprehensive Index and Performance-Related Code, Zenodo [Code]*,  
1064 <https://zenodo.org/records/14351816>. 2024b
- 1065 55. Song, Y.H.: *Historical Daily Precipitation Data of CMIP6 GCMs and ERA5,*  
1066 *Figshare [Dataset]*, <https://doi.org/10.6084/m9.figshare.27999167.v5>. 2024c
- 1067 56. Switanek, M.B., Troch, P.A., Castro, C.L., Leuprecht, A., Chang, H.I., Mukherjee,  
1068 R., and Demaria E.M.C.: Scaled distribution mapping: a bias correction method that  
1069 preserves raw climate model projected changes. *HESS* 21(6), 2649-2666,  
1070 <https://doi.org/10.5194/hess-21-2649-2017>, 2017.
- 1071 57. Tanimu, B., Bello, A.A.D., Abdullahi, S.A. Ajibike, M.A., Yaseen, Z.M.,  
1072 Kamruzzaman, M., Muhammad, M.K.I., and Shahid, S.: Comparison of conventional  
1073 and machine learning methods for bias correcting CMIP6 rainfall and temperature in  
1074 Nigeria. *Theor. Appl. Climatol.* 155, 4423–4452, [https://doi.org/10.1007/s00704-](https://doi.org/10.1007/s00704-024-04888-9)  
1075 [024-04888-9](https://doi.org/10.1007/s00704-024-04888-9), 2024.
- 1076 58. Teutschbein, C., and Seibert, J.: Bias correction of regional climate model  
1077 simulations for 575 hydrological climate-change impact studies: Review and  
1078 evaluation of different 576 methods. *J. Hydrol.* 16, 12-29,  
1079 <http://dx.doi.org/10.1016/j.jhydrol.2012.05.052>, 2012.
- 1080 59. Teng, J., Potter, N. J., Chiew, F. H. S., Zhang, L., Wang, B., Vaze, J., and Evans,  
1081 J.P.: 2015. How does bias correction of regional climate model precipitation affect  
1082 modelled runoff? *HESS* 19, 711–728, <https://doi.org/10.5194/hess-19-711-2015>,  
1083 2015.

- 1084 60. Themeßl, M.J., Gobiet, A., and Heinrich, G.: Empirical-statistical downscaling and  
1085 error correction of daily precipitation from regional climate models. *Int. J. Climatol.*  
1086 31(10), 1530-1544, <https://doi.org/10.1002/joc.2168>, 2012.
- 1087 61. Tong, Y., Gao, X., Han, Z., Xu, Y., and Giorgi, F.: Bias correction of temperature  
1088 and precipitation over China for RCM simulations using the QM and QDM methods.  
1089 *Clim. Dyn.* 57, 1425-1443, <https://doi.org/10.1007/s00382-020-05447-4>, 2021.
- 1090 62. Yip, S., Ferro, C.A.T., Stephenson, D.B., and Hawkins, E.: A simple, coherent  
1091 framework for partitioning uncertainty in climate predictions. *J. Clim.* 24(17), 4634–  
1092 4643, <https://doi.org/10.1175/2011JCLI4085.1>, 2011.
- 1093 63. Woldemeskel, F. M., Sharma, A. Sivakumar, B., and Mehrotra, R.: A framework to  
1094 quantify GCM uncertainties for use in impact assessment studies. *J. Clim.* 519,  
1095 1453–1465, <https://doi.org/10.1016/j.jhydrol.2014.09.025>, 2014.
- 1096 64. Wood, R.R., Lehner, F., Pendergrass, A.G., Schlunegger, S.: Changes in  
1097 precipitation variability across time scales in multiple global climate model large  
1098 ensembles. *Environ. Res. Lett.* 16 084022. [https://doi.org/10.1088/1748-](https://doi.org/10.1088/1748-9326/ac10dd)  
1099 [9326/ac10dd](https://doi.org/10.1088/1748-9326/ac10dd), 2021.
- 1100 65. Wu, Y., Miao, C., Fan, X., Gou, J., Zhang, Q., and Zheng, H.: Quantifying the  
1101 uncertainty sources of future climate projections and narrowing uncertainties with  
1102 Bias Correction Techniques. *Earths Future*, 10(11), e2022EF002963, 2022.
- 1103 66. Zhang, S., Zhou, Z., Peng, P., and Xu, C.: A New Framework for Estimating and  
1104 Decomposing the Uncertainty of Climate Projections. *J. Clim.* 37(2), 365-384,  
1105 <https://doi.org/10.1175/JCLI-D-23-0064.1>, 2024.
- 1106
